1

2       **Reparative macrophages regulate fibrosis by attenuating apoptosis and**  
3                                   **senescence of fibroblasts**

4

5

6

7       Manabu Shiraishi<sup>1,2</sup>, Atsushi Yamaguchi<sup>1</sup> and Ken Suzuki<sup>2</sup>

8

9

10       <sup>1</sup>Department of Cardiovascular Surgery, Saitama Medical Center, Jichi Medical University, Saitama  
11       330-0834, Japan.

12       <sup>2</sup>William Harvey Research Institute, Barts and The London School of Medicine and Dentistry, Queen  
13       Mary University of London, London EC1M 6BQ, United Kingdom.

14

15

16

17       **Address correspondence to:**

18       Manabu Shiraishi, Department of Cardiovascular Surgery, Saitama Medical Center, Jichi Medical  
19       University, Saitama 330-0834, Japan,.

20       Tel: +81-48-647-2111; E-mail: manabu@omiya.jichi.ac.jp

21

22       Character count: 11797

23

24 **Abstract**

25 Appropriate fibrotic tissue formation after myocardial infarction (MI) is crucial to maintain the heart  
26 structure. Reparative or M2-like macrophages play a vital role in fibrosis by activating cardiac  
27 fibroblasts after MI. This study investigated the molecular and cellular mechanisms through which  
28 post-MI fibrosis is formed by focusing on the role of the M2-like macrophage subset and examined  
29 how to control fibrosis formation. We found that cardiac fibroblasts in the infarcted mouse heart  
30 showed apoptosis and senescence, both of which are associated with the fibrotic process. Moreover,  
31 some of the molecular mechanism underlying fibrotic tissue formation in the infarcted myocardium  
32 was attenuation of apoptosis and senescence of fibroblasts by M2-like macrophage-derived  
33 neuregulin 1 (Nrg1)/epidermal growth factor receptor (ErbB) signaling. *In vitro* and *in vivo*  
34 experiments showed that selective Nrg1 receptor inhibition exacerbated senescence of cardiac  
35 fibroblasts, which resulted in excessive progression of fibrosis. These results highlight previously  
36 unidentified anti-apoptotic and anti-senescence effects of the Nrg1/ErbB signaling system on cardiac  
37 fibroblasts after MI.

38

39 **Key words:**

40 apoptosis / fibroblast / fibrosis / macrophage / myocardial infarction / senescence

41

42

43 **Introduction**

44

45 Myocardial infarction (MI) is a leading cause of mortality and disability. Even survivors of acute MI  
46 frequently develop heart failure because of adverse ventricular remodeling (Dickstein, Cohen-Solal et  
47 al., 2008, Zhu, Li et al., 2013). Because the human heart has an insufficient regenerative ability,  
48 connective tissue formation is essential to maintain integrity and rigidity of the heart. However, the  
49 mechanism by which cardiac fibrosis is regulated post-MI is not fully understood.

50 MI causes permanent loss of hundreds of millions of cardiomyocytes (Gemberling, Karra et al.,  
51 2015). Studies have shown that even non-cardiomyocytes, including fibroblasts, disappear in large  
52 quantities through apoptosis in the infarcted area and that senescence-associated defects occur in  
53 cardiac repair post-MI (Gould, Taffet et al., 2002, Takemura, Ohno et al., 1998). Apoptosis plays an  
54 important role in the disappearance of infiltrated immune cells and interstitial cardiac cells after MI  
55 (Takemura et al., 1998). Because senescence and apoptosis of both cardiomyocytes and fibroblasts are  
56 deeply involved in the pathophysiology of left ventricular adverse remodeling and cardiac rupture  
57 after MI (Shih, Lee et al., 2011), determining the molecular mechanisms through which senescence  
58 and apoptosis are regulated during the tissue repair process after MI is important. Senescence and  
59 apoptosis are processes of growth arrest in response to cellular stress and damage, and they limit  
60 proliferation of mammalian cells (Munoz-Espin & Serrano, 2014, Sharpless & Sherr, 2015).  
61 Senescent cells show a complex phenotype characterized by cell cycle arrest mediated through p16  
62 and p53/p21 pathways, and a unique secretory phenotype known as the senescence-associated  
63 secretory phenotype (SASP) (Coppe, Desprez et al., 2010). Cell cycle arrest plays a central role in the  
64 senescent phenotype of adult cardiomyocytes and induction of cell cycle reentry of adult  
65 cardiomyocytes promotes cardiac repair post-MI (Alam, Haile et al., 2019). Anti-apoptotic substances  
66 and Fas receptor competitive inhibitors suppress cardiomyocyte apoptosis, which decrease the infarct  
67 size and improve cardiac functions after MI (Hayakawa, Takemura et al., 2003). Previous studies  
68 have shown that even non-cardiomyocytes, including fibroblasts, undergo apoptosis in the infarcted  
69 area (Gould et al., 2002, Takemura et al., 1998). Therefore, senescence and/or apoptosis of cardiac  
70 fibroblasts may be involved in the tissue repair process after MI. A recent study found that senescent

71 cardiac fibroblasts, in which expression of major senescence regulator p53 was significantly  
72 upregulated, had markedly accumulated in the heart after MI, p53-mediated fibroblast senescence  
73 limited cardiac collagen production, and inhibition of p53 increased reparative fibrosis. Knockdown  
74 of endogenous p53 by small interfering RNA and increased expression of p53 protein by adenoviral  
75 transduction are useful methods to investigate the specific contribution of p53-mediated cardiac  
76 collagen production to the post-MI heart (Zhu et al., 2013). However, these methods have limited  
77 capabilities to identify the cellular and molecular mechanisms by which a particular subset of immune  
78 cells is responsible for regulation of fibroblast senescence and collagen production. To some extent,  
79 senescence of fibroblasts restricts fibrosis, but the long-term presence of this condition is deleterious  
80 to the tissue repair process (Childs, Li et al., 2018). Proper fibrosis after MI is crucial to maintain the  
81 heart structure, but excessive fibrosis eventually leads to heart failure. Therefore, adjusting the  
82 balance between profibrotic and anti-fibrotic environments is important for a successful regenerative  
83 outcome. To understand the tissue repair process of fibrosis, it is necessary to clarify intercellular  
84 communication between senescent and apoptotic fibroblasts and surrounding cells.

85 Recent studies have shown that macrophages are essential for regeneration of the neonatal mouse  
86 heart (Aurora, Porrello et al., 2014). We have previously shown that reparative or M2-like  
87 macrophages play a pivotal role in fibrotic tissue formation post-MI through promotion of  
88 proliferation and activation of cardiac fibroblasts (Shiraishi, Shintani et al., 2016). However, the  
89 molecular mechanism used by M2-like macrophages in the anti-senescence and anti-fibrotic  
90 environment after MI remains unknown. We hypothesized that M2-like macrophages play a vital role  
91 in attenuating apoptosis and senescence that cause excessive fibrosis of cardiac fibroblasts.

92 Neuregulin 1 (Nrg1) is one of the neuregulin genes (*Nrg1–Nrg4*) that belong to the epidermal  
93 growth factor family (Fuller, Sivarajah et al., 2008, Meyer, Yamaai et al., 1997) and Nrg1/epidermal  
94 growth factor receptor (ErbB) signaling systems play essential roles in protection and proliferation of  
95 cardiomyocytes in response to injury (Bersell, Arab et al., 2009, Hedhli, Huang et al., 2011, Lemmens,  
96 Doggen et al., 2007, Polizzotti, Ganapathy et al., 2015, Yutzey, 2015). Although the association  
97 between Nrg1 and protection of cardiomyocytes has been studied for several decades (Bersell et al.,  
98 2009, Hedhli et al., 2011, Lemmens et al., 2007, Polizzotti et al., 2015, Yutzey, 2015), the roles of

99 Nrg1 in protecting cardiac fibroblasts and post-MI regeneration have not been fully established. A  
100 recent study has shown that Nrg1 enhanced cellular proliferation and viability, which was linked to  
101 Nrg1/ErbB4 signaling activity, in normal human cardiac ventricular fibroblasts (Kirabo, Ryzhov et al.,  
102 2017). However, under *in vivo* post-MI conditions, the relationship between M2-like  
103 macrophage-derived Nrg1/ErbB4 signaling activity and anti-senescence and anti-apoptotic effects in  
104 cardiac fibroblasts have not been identified. Another study has indicated that Nrg1 exerted  
105 anti-fibrotic effects in a mouse model of angiotensin II-induced myocardial hypertrophy, which were  
106 explained by the anti-fibrotic effect of Nrg1 linked to the anti-inflammatory activity Nrg1/ErbB4  
107 signaling in macrophages (Vermeulen, Hervent et al., 2017). Furthermore, Nrg1-loaded  
108 poly-microparticles were used in a previous study to induce macrophage polarization toward an  
109 anti-inflammatory phenotype, which prevented macrophages from transitioning toward the  
110 inflammatory phenotype and enhanced cardiac repair after MI (Pascual-Gil, Abizanda et al., 2019).  
111 These studies investigated the contribution of Nrg1/ErbB4 signaling in macrophages and macrophage  
112 polarization toward an anti-inflammatory phenotype to assist cardiac tissue repair, but the significance  
113 of Nrg1/ErbB4 signaling activity in cardiac fibroblasts for anti-fibrotic effects has not been clarified.  
114 Therefore, it is important to accumulate more convincing evidence to determine the precise roles of  
115 M2-like macrophage-derived Nrg1 after MI in senescence, apoptosis, and the fibrotic phenotype of  
116 fibroblasts using a more appropriate model, which will also facilitate dissecting the underlying  
117 mechanism. Therefore, this study investigated the molecular and cellular mechanism by which  
118 post-MI fibrosis is formed with a focus on the role of the M2-like macrophage subset and examined  
119 how to control fibrosis formation. Our findings may help to clarify the pathophysiology of fibrosis  
120 after MI and form the basis for development of new therapeutic methods focused on senescence and  
121 apoptosis of cardiac fibroblasts.

122

## 123 **Results**

124

### 125 ***Cardiac fibroblasts undergo apoptosis and senescence after MI***

126 We investigated cellular senescence and apoptosis in post-MI fibrosis of an MI mouse model  
127 established coronary artery ligation. Obvious fibrotic tissue formation and increased myocardial  
128 expression of fibrosis-associated genes (i.e., alpha-smooth muscle actin [ $\alpha$ SMA], *Coll1a1*, and *Col3a1*)  
129 were observed in the infarct area as early as day 7 post-MI (Fig EV1A and B). This change was  
130 associated with an increase in thymocyte antigen 1 (Thy1)<sup>+</sup> fibroblasts and Thy1<sup>+</sup> $\alpha$ SMA<sup>+</sup>  
131 myofibroblasts in the infarct area (Fig EV1C and D) with a peak at day 7 post-MI. Approximately  
132 40% and 15% of Thy1<sup>+</sup> fibroblasts were positive for cleaved caspase 3 in the infarct area on days 7  
133 and 28 after MI, respectively, which suggested robust apoptosis of cardiac fibroblasts. Cleaved  
134 caspase 3-positive cardiac fibroblasts were rarely found in the non-infarcted remote area (Fig 1A).  
135 Simultaneously, senescence-associated  $\beta$ -galactosidase (SA- $\beta$ -gal)-positive cells were found in the  
136 same infarct area. These cells showed a spindle shape with many cytoplasmic processes, which  
137 suggested that they were fibroblasts (Fig 1B). Additionally, myocardial expression of  
138 senescence-associated genes (i.e., *SA- $\beta$ -gal*, *p16*, *p53*, and *p21*) (Krizhanovsky, Yon et al., 2008,  
139 Munoz-Espin & Serrano, 2014, Sharpless & Sherr, 2015, van Deursen, 2014, Zhu et al., 2013) was  
140 upregulated in the infarct area compared with the non-infarcted remote area (Fig 1C). Increased  
141 apoptosis and senescence of fibroblasts and other types of cardiac cells had exacerbated myocardial  
142 inflammation post-MI (Fig EV1E). Taken together, these results suggest that apoptosis and  
143 senescence occur in cardiac fibroblasts during fibrotic tissue formation in the post-MI heart.

144

145 ***Nrg1 is upregulated in the infarcted myocardium, while cardiac fibroblasts express Nrg1 receptors***

146 Quantitative reverse transcription-polymerase chain reaction (qRT-PCR) showed that *Nrg1* was  
147 upregulated in the infarct area of the mouse heart with a peak on day 7 post-MI (Fig 2A).

148 Immunohistochemistry (IHC) showed that most Thy1<sup>+</sup> cardiac fibroblasts that had accumulated in  
149 infarcted and remote areas were stimulated to express ErbB2 and ErbB4 that are coreceptors of Nrg1  
150 (Lemmens et al., 2007, Olayioye, Neve et al., 2000, Uray, Connelly et al., 2002) (Fig 2B). These  
151 results suggest that Nrg1 is involved in the proliferation and viability of cardiac fibroblasts after MI.

152

153 ***M2-like macrophages accumulate in the infarct area and express Nrg1***

154 M2-like macrophages play a major role in fibrotic tissue formation post-MI (Shiraishi et al., 2016).  
155 IHC showed that CD206<sup>+</sup> M2-like macrophages had accumulated in the infarct area with a peak at  
156 day 7 post-MI (Fig 3A). We found that the left ventricular myocardium of adult mice contained  
157 CD11b<sup>+</sup>F4/80<sup>+</sup> macrophages, more than 90% of which were positive for CD206. Conversely, the  
158 majority of CD206<sup>+</sup> cardiac cells were positive for both F4/80 and CD11b in both normal and post-MI  
159 hearts in our previous study (Shiraishi et al., 2016). We further confirmed that CD206<sup>+</sup> cells were also  
160 positive for F4/80 in intact and MI hearts (Fig 3B). Interestingly, this change in M2-like macrophages  
161 post-MI corresponded to a change in the occurrence of cardiac fibroblasts post-MI (Fig EV1C).  
162 Microarray analysis showed that CD206<sup>+</sup>F4/80<sup>+</sup>CD11b<sup>+</sup> M2-like macrophages collected from hearts  
163 on day 7 after MI had a different molecular signature than those from intact hearts (Fig EV2A). A  
164 range of anti-inflammatory and reparative genes were upregulated in CD206<sup>+</sup>F4/80<sup>+</sup>CD11b<sup>+</sup> M2-like  
165 macrophages from MI hearts compared with intact hearts (Supplemental Figure 2B; full data are  
166 available in the Gene Expression Omnibus [GEO] database; GSE69879). Importantly, gene ontology  
167 analysis showed that M2-like macrophages collected from hearts on day 7 after MI were associated  
168 with regulation of apoptosis and cell death (Fig EV2C). Considering the differences in gene  
169 expression of cardiac CD206<sup>+</sup>F4/80<sup>+</sup>CD11b<sup>+</sup> M2-like macrophages before and after MI, we focused  
170 on the increased *Nrg1* expression level in CD206<sup>+</sup>F4/80<sup>+</sup>CD11b<sup>+</sup> cardiac M2-like macrophages after  
171 MI (Fig 3C), which was confirmed by qRT-PCR and IHC (Fig 3D and E). By searching for genes  
172 related to proliferation and viability in the genetic information obtained from HomoloGene  
173 (<https://www.ncbi.nlm.nih.gov/homologene>), we hypothesized that *Nrg1* might be a critical mediator  
174 of anti-senescence and anti-apoptosis activation in cardiac fibroblasts. These data suggest that cardiac  
175 M2-like macrophages are a source of upregulated *Nrg1* post-MI.

176

177 ***Bone marrow-derived macrophages attenuate H<sub>2</sub>O<sub>2</sub>-induced apoptosis and senescence of cardiac***  
178 ***fibroblasts via Nrg1 secretion***

179 We next investigated the role of macrophages in regulating senescence and apoptosis in *in vitro*  
180 coculture of cardiac fibroblasts with bone marrow-derived macrophages (BMDMs) using a Boyden  
181 Chamber system in which cells were able to be independently stained or genetically analyzed without

182 mixing with each other (Shiraishi et al., 2016, Suzuki, Arumugam et al., 2014) (Fig EV3A). H<sub>2</sub>O<sub>2</sub> was  
183 used to induce apoptosis and senescence of fibroblasts (Fig EV3B and C). BMDMs cultured in the  
184 presence of H<sub>2</sub>O<sub>2</sub> showed an M2-like macrophage phenotype (Fig EV4A and B). Similar to *in vivo*  
185 findings after MI (Figs 2B, 3D and E), we observed increased expression of *Nrg1* in BMDMs and  
186 *ErbB2* and *ErbB4* in H<sub>2</sub>O<sub>2</sub>-treated cardiac fibroblasts (Fig EV5A–C). Such gene expression was  
187 upregulated in response to H<sub>2</sub>O<sub>2</sub>. Phase-contrast microscopy showed that fibroblasts treated with H<sub>2</sub>O<sub>2</sub>  
188 had an enlarged, flattened, senescent morphology, which became a spindle-shaped healthy form after  
189 coculture with BMDMs. Senescent fibroblasts treated with an anti-ErbB4 antibody (Ab), which is a  
190 competitive inhibitor of Nrg1, displayed the same gross morphology as senescent fibroblasts treated  
191 with H<sub>2</sub>O<sub>2</sub>. Recombinant Nrg1 similarly returned the gross morphology of senescent fibroblasts  
192 treated with H<sub>2</sub>O<sub>2</sub> to a spindle-shaped healthy form (Fig 4A). SA-β-gal staining showed that  
193 approximately 20% of fibroblasts treated with H<sub>2</sub>O<sub>2</sub> became positive for SA-β-gal. This change was  
194 significantly attenuated by coculture with BMDMs, whereas addition of the anti-ErbB Ab eliminated  
195 this anti-senescence effect of BMDMs. Furthermore, administration of recombinant Nrg1 suppressed  
196 H<sub>2</sub>O<sub>2</sub>-induced senescence of fibroblasts (Fig 4B). The ratio of cleaved caspase 3<sup>+</sup> apoptotic cells  
197 among cardiac fibroblasts was also significantly increased by H<sub>2</sub>O<sub>2</sub> stimulation (Fig 4C). Coculture  
198 with BMDMs markedly attenuated this apoptotic change in fibroblasts. The anti-apoptotic effect of  
199 BMDMs was attenuated by addition of the anti-ErbB Ab, whereas administration of recombinant  
200 Nrg1 suppressed H<sub>2</sub>O<sub>2</sub>-induced apoptosis of fibroblasts. Immunolabeling of Ki67 showed that the  
201 proliferative property of cardiac fibroblasts was significantly attenuated by H<sub>2</sub>O<sub>2</sub> stimulation (Fig 4D).  
202 Coculture with BMDMs markedly improved these cellular activities in fibroblasts. The effects of  
203 BMDMs were attenuated by addition of the anti-ErbB Ab, whereas administration of recombinant  
204 Nrg1 suppressed H<sub>2</sub>O<sub>2</sub>-induced functional deterioration of fibroblasts. H<sub>2</sub>O<sub>2</sub> stimulation reduced the  
205 proliferative activity of cardiac fibroblasts, which was rescued by coculture with BMDMs. This effect  
206 of BMDMs was eliminated by addition of the anti-ErbB Ab. Recombinant Nrg1 administration  
207 showed a strong ability to increase proliferation of fibroblasts. These results collectively suggest that  
208 M2-like macrophages reduce apoptosis and senescence of fibroblasts through secretion of Nrg1.  
209



210 ***BMDMs promote activation of fibroblasts and collagen synthesis***

211 Immunocytological staining showed that, although independent H<sub>2</sub>O<sub>2</sub> treatment did not affect  
212 conversion of cardiac fibroblasts into  $\alpha$ SMA<sup>+</sup> myofibroblasts, coculture with BMDMs and H<sub>2</sub>O<sub>2</sub>  
213 stimulation activated fibroblasts. Furthermore, addition of the anti-ErbB Ab enhanced this  
214 BMDM-induced activation of fibroblasts. Moreover, addition of recombinant Nrg1 did not affect  
215 conversion of cardiac fibroblasts (Fig 5A). Changes in synthesis of types I and III collagen in  
216 fibroblasts in response to H<sub>2</sub>O<sub>2</sub>, BMDMs, and Nrg1 were associated with that of  $\alpha$ SMA expression  
217 (Fig 5B and C). These results suggest that BMDMs, which have an M2-like phenotype (Fig EV4A  
218 and B), induce activation of fibroblasts to convert into myofibroblasts and this activation is  
219 accelerated with progression of fibroblast senescence. Osteopontin (*Spp1*) is a major mediator of  
220 M2-like macrophage-induced cardiac fibroblast activation (Shiraishi et al., 2016). *Spp1* expression  
221 was increased in BMDMs in response to H<sub>2</sub>O<sub>2</sub> (Fig EV6A). Conversely, other profibrotic factors,  
222 including *Tgfb1* and *Pdgfa* (Shinde & Frangogiannis, 2014, van den Borne, Diez et al., 2010), were  
223 not upregulated in M2-like macrophages (Fig EV6B).

224

225 ***Phosphatidylinositol 3-kinase/protein kinase B signaling is associated with BMDM-attenuated***  
226 ***apoptosis and senescence of cardiac fibroblasts through Nrg1***

227 We next investigated the potential mechanism underlying attenuation of apoptosis of cardiac  
228 fibroblasts and senescence by BMDM-derived Nrg1. The phosphatidylinositol 3-kinase  
229 (PI3K)/protein kinase B (Akt) signaling pathway is downstream of the ErbB pathway. Western blot  
230 analysis showed that coculture with BMDMs increased PI3K/Akt activation in fibroblasts, but this  
231 was attenuated by addition of the anti-ErbB Ab. Recombinant Nrg1 administration also activated the  
232 PI3K/Akt pathway in fibroblasts (Fig 6A). To determine the possible relationship between  
233 senescence-associated p16/p53/p21 and Nrg1/ErbB/PI3K/Akt signaling pathways, we examined  
234 mRNA expression levels of senescence-associated genes (*p53*, *p21*, *p16*, and *SA- $\beta$ -gal*) (Fig 6B), cell  
235 cycle-associated genes (cyclin-dependent kinase 4 [*Cdk4*], cyclin-dependent kinase 6 [*Cdk6*],

236 cyclin-dependent kinase 2 [*Cdk2*], and *Ki-67*) (Fig 6C), a p53 suppressor gene (murine double minute  
237 2 [*MDM2*]) (Fig 6D), a cell survival-associated gene (mechanistic target of rapamycin [*mTOR*]) (Fig  
238 6E), and SASP-associated gene (interleukin-6 [*IL-6*]) (Fig 6F). Expression of senescence-associated  
239 genes (*p16* and *p21*) and an SASP-associated gene (*IL-6*) was significantly higher and expression of  
240 cell cycle-associated genes (*Cdk4*, *Cdk6*, *Cdk2*, and *Ki-67*) and a cell survival-associated gene  
241 (*mTOR*) was markedly lower in fibroblasts treated with H<sub>2</sub>O<sub>2</sub> compared with controls. Importantly,  
242 these changes in gene expression, including progression of senescence and inflammation, and  
243 suppression of the cell cycle recovered to those of controls after coculture with BMDMs. Addition of  
244 the anti-ErbB Ab resulted in gene expression similar to that induced by H<sub>2</sub>O<sub>2</sub> treatment. Moreover,  
245 expression of senescence-associated genes (*p53*, *p16*, and *p21*) was significantly suppressed and  
246 expression of cell cycle-associated genes (*Cdk4*, *Cdk6*, *Cdk2*, and *Ki-67*) was enhanced by  
247 recombinant Nrg1 in fibroblasts treated with H<sub>2</sub>O<sub>2</sub>. In terms of other related genes, BMDMs enhanced  
248 expression of the p53 suppressor gene *MDM2*. These results suggest that the Nrg1/ErbB system  
249 operates downstream of PI3K/Akt signaling activation and exerts a suppressive effect on cell cycle  
250 arrest, senescence, and apoptosis. Simultaneously, this signaling activity is likely to increase cellular  
251 proliferation and survival (Fig 6G).

### 253 ***In vivo inhibition of Nrg1 signaling exacerbates fibrosis***

254 We used trastuzumab to clarify the role of Nrg1 in suppressing senescence and apoptosis of cardiac  
255 fibroblasts post-MI *in vivo*. Trastuzumab is an anti-human epidermal growth factor receptor type 2  
256 (HER2) monoclonal antibody that binds to the extracellular juxtamembrane domain of HER2.  
257 Trastuzumab is an effective treatment for HER2/neu<sup>+</sup> tumors in animals and humans (ElZarrad,  
258 Mukhopadhyay et al., 2013, Park, Jiang et al., 2010). We hypothesized that trastuzumab  
259 administration would eliminate the anti-apoptotic and anti-senescence effects of Nrg1 and therefore  
260 increase the number of senescent cardiac fibroblasts. On the basis of the *in vitro* coculture model, we  
261 also hypothesized that trastuzumab administration would encourage the progression of senescence  
262 and apoptosis of cardiac fibroblasts, which increase fibrotic scar formation in the infarcted

263 myocardium. We found that intraperitoneal trastuzumab injections did not affect mRNA expression in  
264 the intact heart (Fig EV7A–D).

265 Mice underwent surgery to induce MI and received intraperitoneal injections of either trastuzumab  
266 or vehicle only (Fig EV8A). Trastuzumab did not affect post-MI mortality or body weight (Fig EV8B  
267 and C). Gene expression profiles in the infarcted myocardium suggested that senescence and  
268 apoptosis were augmented by trastuzumab administration in the infarct area (Fig 7A–C). These  
269 changes in gene expression corresponded to an increase in apoptotic fibroblasts and senescent cardiac  
270 cells in the infarct area (Fig 7D and E). Additionally, trastuzumab administration increased fibrotic  
271 tissue formation in the infarct area (Fig 8A). In fact, Thy-1<sup>+</sup> fibroblasts were increased in this area  
272 (Fig 8B). The number of  $\alpha$ SMA<sup>+</sup>Thy1<sup>+</sup> myofibroblasts was also increased in association with  
273 upregulation of  *$\alpha$ SMA*, *Colla1*, and *Col3a1* in the infarcted myocardium (Fig 8B and C). Increased  
274 inflammation (Fig 9A) and increased M2-like macrophages in this area (Fig 9B) may explain these  
275 findings. Trastuzumab administration might have increased senescence and apoptosis of fibroblasts  
276 and other types of cardiac cells, which exacerbated myocardial inflammation post-MI. This led to  
277 accumulation of M2-like macrophages. Such augmented inflammatory signals or an increase in the  
278 number of M2-like macrophages could accelerate proliferation of cardiac fibroblasts, while increased  
279 M2-like macrophages could promote activation of fibroblasts to convert into myofibroblasts.  
280 Subsequently, trastuzumab administration might have exacerbated fibrotic tissue formation.  
281 Interestingly, trastuzumab administration induced apoptosis- and senescence-associated gene  
282 expression in the remote area (Fig EV9A–E) in which direct ischemic damage hardly occurred  
283 post-MI. This corresponded to increased inflammation (Fig EV11A). These changes augmented the  
284 accumulation of M2-like macrophages and cardiac fibroblasts in the remote myocardium (Figs  
285 EV10B and 11A). Conversion of fibroblasts into myofibroblasts and fibrosis-associated gene  
286 expression were also induced (Fig EV12A and B). Consequently, fibrosis occurred even in the remote  
287 area (Fig EV12). These results suggest that trastuzumab augments apoptosis and senescence of  
288 cardiac fibroblasts post-MI, which results in excessive fibrosis, even in the non-infarcted remote area.

289

290 **Discussion**

291

292       Despite the enormous clinical importance of cellular and molecular processes underlying the  
293 formation of post-MI fibrosis, they are not well understood. To precisely determine the roles of  
294 cardiac M2-like macrophages in apoptosis and senescence of fibroblasts, we analyzed an *in vitro*  
295 experimental model in which H<sub>2</sub>O<sub>2</sub>-induced senescent cardiac fibroblasts were cocultured with  
296 BMDMs. This *in vitro* model reflects the *in vivo* conditions of post-MI because senescent cells attract  
297 macrophages under pathological conditions (Sasaki, Miyakoshi et al., 2010). The model allowed us to  
298 determine the precise interaction between M2-like macrophages and senescent cardiac fibroblasts.  
299 Briefly, the possible mechanism is that activation of the macrophage-derived Nrg1/ErbB/PI3K/Akt  
300 signaling pathway suppresses senescence and apoptosis of injured cardiac fibroblasts, which inhibits  
301 excessive collagen synthesis. ErbB is also expressed on the surface of macrophages and  
302 myeloid-specific ErbB gene deletion exacerbates myocardial fibrosis (Vermeulen et al., 2017).  
303 Furthermore, Nrg1-induced macrophage polarization from an inflammatory phenotype toward an  
304 anti-inflammatory phenotype enhances cardiac repair after MI (Pascual-Gil et al., 2019). Therefore, a  
305 concern might be the possibility that ErbB signaling in BMDMs was simultaneously affected when  
306 the anti-ErbB Ab was added to the culture medium in our coculture experiments. Our depletion  
307 method using the anti-ErbB Ab has limited specificity for cardiac fibroblasts. This method depletes  
308 Nrg1/ErbB signaling in both fibroblasts and BMDMs. Thus, exacerbated phenotypic changes in  
309 senescence and apoptosis were not caused by specific inhibition of Nrg1/ErbB signaling in fibroblasts.  
310 However, in the H<sub>2</sub>O<sub>2</sub>+Nrg1 group, only recombinant Nrg1 was added to the medium. Therefore, this  
311 group excluded the effects of Nrg1/ErbB signaling suppression in BMDMs by the anti-ErbB Ab and  
312 the results of senescence, the apoptotic phenotype, and gene expression were similar to the  
313 H<sub>2</sub>O<sub>2</sub>+BMDM group (Figs 4A–C and 6A, B). Therefore, our data suggested that Nrg1/ErbB signaling  
314 activity in fibroblasts had a greater effect on anti-senescence and anti-apoptotic effects in fibroblasts  
315 compared with Nrg1/ErbB signaling activity related to anti-inflammation in macrophages.

316       Nrg1 is a cytokine that belongs to a family of proteins structurally related to epidermal growth  
317 factor and plays essential roles in protection and proliferation of cardiomyocytes in response to injury  
318 (Bersell et al., 2009, Hedhli et al., 2011, Lemmens et al., 2007, Polizzotti et al., 2015, Yutzey, 2015).

319 Nrg1 is synthesized in endothelial cells near cardiomyocytes (Lemmens et al., 2007). We observed  
320 that *Nrg1* was expressed in M2-like macrophages and that it had a specific function to rescue  
321 post-MI-induced senescent and apoptotic cardiac fibroblasts. Cardiac fibroblasts expressed  
322 ErbB2/ErbB4 in the damaged myocardium on days 7 and 28 post-MI. Nrg1 binds to the ErbB4  
323 receptor. After heterodimerization with phosphorylated ErbB2, signaling pathways that are activated  
324 downstream of ErbB2/ErbB4 signals link to the Ras-mitogen-activated protein kinase pathway and  
325 PI3K/Akt pathways (Lemmens et al., 2007). The hypertrophic response to Nrg1 is mainly dependent  
326 on Ras, whereas the anti-apoptotic and cell proliferation effects are likely to be dependent on Akt  
327 (Baliga, Pimental et al., 1999, Gelb & Tartaglia, 2011, Kuramochi, Cote et al., 2004). Therefore, Nrg1  
328 may attenuate expression of senescence-associated genes *p53*, *p21*, and *p16* through PI3K/Akt  
329 pathways. In our study, we observed a transient increase in *p53*, *p21*, and *p16* expression in the  
330 infarcted myocardium and cultured fibroblasts. Zhu *et al.* reported that MI promotes accumulation of  
331 senescent cardiac fibroblasts in the heart and *p53* expression (Zhu et al., 2013). Increased p53 activity  
332 in response to diverse pathological stresses, such as MI, induces apoptosis (Long, Boluyt et al., 1997,  
333 Polyak, Xia et al., 1997). Stress-induced *p53* expression increases *p21* expression in response to DNA  
334 damage and induces reversible proliferative arrest that provides time for DNA repair and facilitates  
335 survival of cells (Deng, Zhang et al., 1995, Wang, Elson et al., 1997). Previous studies have shown  
336 that p21 binds to and inhibits CDK2-mediated inactivation of retinoblastoma, which subsequently  
337 prevents entry into the S phase of the cell cycle (Childs, Durik et al., 2015, Munoz-Espin & Serrano,  
338 2014). Furthermore, p21 is important to initiate senescence in some settings, but its expression does  
339 not persist in senescent cells (Alcorta, Xiong et al., 1996, Stein, Drullinger et al., 1999).  
340 Simultaneously, increased *p16* expression is found in infarcted tissue. Irreversible proliferative arrest  
341 can be induced by p16 that inhibits two cycle-dependent kinases, CDK4 and CDK6 (Munoz-Espin &  
342 Serrano, 2014, Serrano, Lin et al., 1997). Therefore, a change in expression of these genes (i.e., *p53*,  
343 *p21*, and *p16*) in cardiac cells *in vivo* and cardiac fibroblasts *in vitro* suggests that Nrg1 is a crucial  
344 factor that controls reversible and irreversible senescence of cardiac cells after MI.

345 Previous reports have shown that trastuzumab efficiently stops or slows the growth of ErbB2<sup>+</sup> cells  
346 *in vitro* and inhibits the ability of cells to repair damaged DNA (ElZarrad et al., 2013, Park et al.,

347 2010). Our study showed that trastuzumab injection further increased senescence and apoptosis in the  
348 infarcted myocardium. As inflammation worsens, M2-like macrophages from bone marrow  
349 accumulate at the site of damaged tissue (Ikeda, Asano et al., 2018). In our study, progression of  
350 senescence and apoptosis in cardiac fibroblasts and exacerbation of inflammation induced by  
351 trastuzumab increased the accumulation of M2-like macrophages, which promoted activation of  
352 fibroblasts and excessive fibrosis. These results are consistent with our previous report indicating that  
353 interleukin 4-mediated M2-like macrophage activation induces conversion of fibroblasts into  
354 myofibroblasts for progression of fibrosis (Shiraishi et al., 2016). Osteopontin is a major mediator of  
355 M2-like macrophage-induced activation of cardiac fibroblasts (Shiraishi et al., 2016). Although we  
356 analyzed mRNA gene expression in tissue sections of the heart and not in single cells, increased  
357 expression levels of senescence-associated genes were considered to reflect senescence of fibroblasts  
358 to a certain extent. These results corresponded to *in vitro* observations using the anti-ErbB Ab.  
359 Addition of the anti-ErbB Ab further increased senescence and apoptosis. This exacerbation of  
360 senescence and apoptosis induced by the anti-ErbB Ab promoted activation of fibroblasts cocultured  
361 with BMDMs, which augmented collagen synthesis.

362 Interestingly, senescence and SASP-associated gene expression peaked slightly later in the remote  
363 area than in the infarct area. One possible pathological mechanism of the non-infarcted remote area is  
364 assumed to be indirect damage via SASP rather than direct cytotoxicity due to ischemia. Senescent  
365 cells autonomously induce senescence-like gene expression in their surrounding non-senescent cells  
366 through SASP (Acosta, Banito et al., 2013). Increased SASP in the infarct area might not simply  
367 affect senescence and apoptosis of cells in the infarct area, but also have a harmful influence on  
368 non-senescent cells in the remote area. All of these data suggest that trastuzumab-induced  
369 exacerbation of fibrosis is mainly mediated by progression of senescence and apoptosis in cardiac  
370 fibroblasts.

371 Nrg1 has been repeatedly reported to play important roles in injured cardiomyocytes (Bersell et al.,  
372 2009, Hedhli et al., 2011, Lemmens et al., 2007, Polizzotti et al., 2015, Yutzey, 2015). Injecting Nrg1  
373 in adult mice induces cardiomyocyte cell-cycle activity and promotes myocardial regeneration,  
374 leading to improved function after myocardial infarction (Bersell et al., 2009). Nrg1 significantly

375 decreases apoptosis of adult cardiomyocytes under hypoxia-reoxygenation conditions (Hedhli et al.,  
376 2011). *Nrg1* also has Akt-dependent anti-apoptotic effects on cardiomyocyte growth and survival  
377 (Lemmens et al., 2007). Administration of recombinant *Nrg1* improves myocardial functions and  
378 reduces the prevalence of transmural scars after MI (Polizzotti et al., 2015). However, its role in  
379 cardiac fibroblasts in this context has not been well studied. Our data provide new biological insights  
380 into the molecular mechanisms by which M2-like macrophages regulate post-MI tissue repair by  
381 affecting senescence, apoptosis, and proliferation of fibroblasts. This inherent reparative function  
382 allows senescent cardiac fibroblasts to recover to a certain degree. Conversely, incomplete rescue of  
383 fibroblasts from senescence might lead to undesired fibrosis. We present new *in vitro* evidence  
384 suggesting that M2-like macrophages play a vital role in attenuating senescent and apoptotic  
385 fibroblasts through *Nrg1*/ErbB/PI3K/Akt signaling pathways. This contributes to various processes  
386 that are critical to mediate many aspects of cellular functions including cell growth and survival (Yu  
387 & Cui, 2016). However, further mechanistic studies are required to understand the signaling pathways  
388 downstream of these factors and the clear role of *Nrg1* using both cardiac fibroblast-specific  
389 conditional *ErbB2*/*ErbB4*-knockout mice and macrophage-specific conditional *Nrg1*-knockout mice.  
390 Although this study focused on *Nrg1*-induced anti-apoptosis and anti-senescence of cardiac  
391 fibroblasts, M2-like macrophages are likely to mediate supplementary benefits in cardiac repair  
392 post-MI. These benefits may include reduced inflammation, activation of fibroblasts, and neovascular  
393 formation as shown in our previous study (Shiraishi et al., 2016). To develop potential therapies  
394 mediated by M2-like macrophages, future studies will also need to determine how the gene that  
395 encodes *Nrg1* is switched on by MI and identify other molecules that regulate apoptosis, senescence,  
396 and proliferation of cardiac fibroblasts. Better understanding of the molecular mechanism in the  
397 healing process of MI and subsequent remodeling may reveal new treatment options.

398 In conclusion, our data provide evidence that the *Nrg1*/ErbB/PI3K/Akt signaling system critically  
399 regulates senescence and apoptosis of cardiac fibroblasts in the infarcted adult murine heart. This  
400 process might play a vital role in repair of the infarcted myocardium by regulating collagen synthesis  
401 (Fig 10). Therefore, this tissue repair mechanism controls the degree of rigidity and contraction of the  
402 infarcted heart, thereby determining the prognosis post-MI. Targeted activation of M2-like

403 macrophages might enhance this endogenous repair mechanism in senescent cardiac fibroblasts,  
404 which indicates that this approach may be a new therapeutic treatment for MI.

405

## 406 **Methods**

407

408 **Animals.** Eight- to 10-week-old mice were used in the experiments. C57BL/6 mice were purchased  
409 from Tokyo Laboratory Animals Science Co., Ltd. The mice were maintained in a specific  
410 pathogen-free room in our animal facility with a 12-hour light/dark cycle and free access to food and  
411 water. *In vitro* and *in vivo* experiments were performed in a blinded manner.

412 ***In vivo treatments.*** Mice were treated with three i.p. injections of 100 µg Trastuzumab (Bio X Cell;  
413 catalog BE0277) on the fourth, fifth, and sixth days after induction of myocardial infarction (MI).  
414 Samples were collected on the seventh, 12<sup>th</sup>, and 28<sup>th</sup> days after induction of MI.

415 ***Preparation of bone marrow-derived macrophages (BMDMs).*** Mouse BMDMs were prepared from  
416 the femurs and tibiae of 8-week-old wildtype (WT) mice as described previously (Shiraishi et al.,  
417 2016). Bone marrow mononuclear cells were collected by centrifugation on Ficoll-Paque (GE  
418 Healthcare) and were cultivated overnight in a CO<sub>2</sub> incubator in Dulbecco's modified Eagle's medium  
419 (DMEM; Sigma-Aldrich) containing 10% fetal bovine serum (FBS), 50 U/mL penicillin, 50 µg/mL  
420 streptomycin, and 10 ng/mL granulocyte-macrophage colony stimulating factor (R&D Systems;  
421 415-ML). Unattached or weakly attached cells were collected and transferred to new dishes and  
422 cultivated for an additional 5 days. The cells were then prepared for coculture experiments.

423 ***Coculture of cardiac fibroblasts and BMDMs in a Boyden chamber.*** Cardiac fibroblasts ( $2 \times 10^4$ )  
424 were plated on a 0.1% gelatin-coated 6-well dish (Thermo Scientific) and cultured for 48 hours in  
425 DMEM containing 10% FBS, 50 U/mL penicillin, and 50 µg/ mL streptomycin. Cardiac fibroblasts  
426 were damaged by 1 hour of treatment with 100 µM hydrogen peroxide (Sigma), as described  
427 previously (Bladier, Wolvetang et al., 1997) with some modifications. Then, the damaged fibroblasts  
428 were maintained in DMEM containing 10% FBS, 50 U/mL penicillin, and 50 µg/mL streptomycin.  
429 BMDMs ( $2 \times 10^4$ ) were seeded on polycarbonate membrane inserts (0.4 µm pore size; Thermo



430 Scientific) that were placed in wells containing fibroblasts. An anti-ErbB4 Ab (10 µg/mL; Thermo  
431 Scientific; catalog MA5-13016) was added to the culture medium at the beginning of the coculture.  
432 **Induction of myocardial infarction (MI).** MI was induced in mice by ligating the left coronary artery  
433 under 2.0% isoflurane anesthesia and mechanical ventilation as described previously (Tano, Narita et  
434 al., 2014). Successful establishment of MI was confirmed by changes in the color and motion of the  
435 left ventricular walls. The survival rate and body weight change after MI were monitored daily.  
436 **Isolation of heart cells.** Mouse heart cells were isolated as described previously (Shintani, Kapoor et  
437 al., 2013). Immediately after cervical dislocation, the aorta was clamped and cold Hank's balanced  
438 salt solution (HBSS; Sigma-Aldrich) was injected into the left ventricular cavity. The isolated hearts  
439 were cut into 1 mm<sup>3</sup> pieces, digested with 0.05% collagenase II (Sigma-Aldrich) at 37 °C for 15  
440 minutes and then filtered through a 40-µm cell strainer (BD Falcon). The remnant heart tissues were  
441 digested again with a fresh digestion solution and similarly filtered. This cycle was repeated five  
442 times. The suspension obtained at each cycle was combined and subjected to flow cytometric analyses  
443 or fluorescence-activated cell sorting (FACS) after erythrocytes were depleted with Red Cell Lysis  
444 Buffer (BioLegend) in accordance with the manufacturer's protocol.  
445 **Flow cytometry and FACS.** The isolated cells were resuspended in FACS buffer (HBSS with 2 mM  
446 EDTA and 0.5% BSA) and preincubated with an anti-mouse CD16/CD32 Ab (rat, 1:100 dilution;  
447 eBioscience; catalog 14-0161) to block Fc receptors. Dead cells and debris were excluded by forward  
448 scatter/side scatter and DAPI staining (1:1,000 dilution; Sigma-Aldrich). To determine phenotypes,  
449 the cells were stained with the following Abs for 3 hours at 4 °C: APC-conjugated anti-CD11b Ab  
450 (rat, 1:100 dilution; eBioscience; catalog 17-0112); phycoerythrin (PE)-conjugated anti-F4/80 Ab (rat,  
451 1:20 dilution; eBioscience; catalog 12-4801), and Alexa Fluor 488-conjugated anti-CD206 Ab (rat,  
452 1:50 dilution; BioLegend; catalog 141709). Cell sorting was performed with a FACSAria II (BD  
453 Biosciences).  
454 **Isolation of cardiac fibroblasts.** Cardiac fibroblasts were isolated from Wistar rats (Charles River  
455 Laboratories) as described previously (Leicht, Greipel et al., 2000) with some modifications. The  
456 isolated rat heart was cut into 1 mm<sup>3</sup> pieces that were plated evenly in 0.1% gelatin-coated 10-cm  
457 dishes without contacting each other. Each fragment was covered by a droplet of DMEM containing

458 10% FBS, 50 U/ mL penicillin, and 50 µg/mL streptomycin and incubated for 24 hours at 37 °C in a  
459 CO<sub>2</sub> incubator. Then, sufficient medium was added to cover the entire bottom of the culture dish, and  
460 the culture was incubated for an additional 24 hours. After this period, sufficient medium was added  
461 to completely cover the heart fragments and the culture was continued for an additional 5 days. When  
462 fibroblast outgrowth was observed, the cells were collected by trypsinization. The fibroblasts were  
463 maintained in DMEM containing 10% FBS, 50 U/mL penicillin, and 50 µg/mL streptomycin in 0.1%  
464 gelatin-coated culture flasks. The cells were used at passage 3 or 4.

465 ***RNA extraction and real-time polymerase chain reaction (PCR).*** Total RNA was extracted from  
466 cells or heart tissue with a Gene Jet PCR purification Kit (Thermo Scientific) and quantified with a  
467 Nano-Drop 8000 spectrophotometer (Thermo Scientific). cDNA was synthesized using 25 and 150 ng  
468 total RNAs from M2-macrophages and heart tissues, respectively, with a High-capacity cDNA  
469 Reverse Transcription Kit (Applied Biosystems). Real-time PCR was performed by a QuantStudio  
470 (Applied Biosystems) with SYBR Premix Ex Taq II (Takara Bio) under the following conditions:  
471 95 °C for 30 seconds followed by 40 cycles at 95 °C for 5 seconds and 60 °C for 30 seconds. Gene  
472 expression levels were normalized to *Gapdh* expression. The primers are shown in Supplemental  
473 Table 1.

474 ***Microarray analysis.*** Total RNA of CD206<sup>+</sup>F4/80<sup>+</sup>CD11b<sup>+</sup> M2-like macrophages was isolated as  
475 described above from the heart and peritoneal cavity, amplified with the RNA Amplification System  
476 (NuGEN), and subjected to the Illumina bead array platform with a Mouse WG-6 v2.0 Expression  
477 BeadChip (Illumina). Two independent biological replicates were prepared for each group category.  
478 Median per chip normalization was performed in each array. We analyzed only genes whose signal  
479 intensity was above 90 in one of the biological duplicates. A two-fold change cutoff was used to  
480 identify differentially expressed genes.

481 ***Immunohistochemistry.*** Immediately after cervical dislocation, the aorta of the mouse was clamped  
482 and ice-cold PBS was injected into the left ventricular cavity. The mouse heart was then perfused with  
483 ice-cold 4% paraformaldehyde in PBS. The heart was removed, cut at the midpoint along the short  
484 axis of left ventricle, embedded in optimal cutting temperature compound (VWR International), and  
485 frozen in isopentane chilled in liquid nitrogen. Frozen tissue sections (8 µm thick) were prepared and

486 non-specific antibody-binding sites were pre-blocked with blocking buffer (PBS containing 5% goat  
487 serum). Then, primary antibodies were applied overnight at 4 °C. After rinsing three times for 15  
488 minutes in PBS, the sections were incubated with appropriate fluorophore-conjugated secondary  
489 antibodies and 4',6-diamidino-2-phenylindole (DAPI) (Sigma-Aldrich, D9542) in blocking buffer  
490 for 1 hour at room temperature. Stained sections were mounted with DAKO Fluorescence Mounting  
491 Medium (Agilent, S302380-2). The primary and secondary antibodies used in this study are shown in  
492 Supplemental Table 2.

493 ***Picrosirius red staining.*** Frozen tissue sections (8 µm thick) were incubated in 1.5%  
494 phosphomolybdic acid for 60 minutes, 0.1% Picrosirius Red for 15 minutes, and then a 0.5% acetic  
495 acid solution for 3 minutes. After dehydration by adding increasing concentrations of ethanol to  
496 xylene, the sections were mounted with DPX mounting medium (VWR International). The infarct  
497 area was defined as the area with loss of more than 90% cardiomyocytes.

498 ***Masson trichrome staining.*** Frozen tissue sections (8 µm thick) were prepared as described above  
499 and stained using a Trichrome Stain Kit (Scy Tek Laboratories) in accordance with the  
500 manufacturer's instructions.

501 ***Immunocytochemistry.*** Cells were fixed in 4% paraformaldehyde/PBS for 5 minutes at room  
502 temperature. Apart from cells used for surface antigen staining, cells were incubated in PBS  
503 containing 0.1% of Triton X-100 for 5 minutes at room temperature. Non-specific antibody binding  
504 sites were pre-blocked with PBS containing 5% goat serum for 30 minutes at room temperature. Then,  
505 primary antibodies were applied to the cells for 1 hour at room temperature. The primary antibodies  
506 were as follows: anti-vimentin (1:100, Abcam, ab24525), anti-cleaved caspase 3 (1:100, Cell  
507 Signaling, 9661), anti-Ki-67 (1:100, eBioscience, 14-5698), and anti-αSMA (1:00, Abcam, ab5694).  
508 After rinsing, the cells were incubated with fluorophore-conjugated secondary antibodies (1:300,  
509 Alexa Fluor 488- or 594-conjugated polyclonal, Invitrogen) and DAPI in blocking buffer for 1 hour at  
510 room temperature.

511 ***Imaging and analysis.*** Digital images were acquired under an All-in-One microscope (BZ-8000;  
512 KEYENCE). Image analyses were performed by importing images as TIFF files into ImageJ software  
513 (National Institute of Health). To quantify fibrin formation, the fibrin area was quantified as the

514 percentage of the fibrin-positive area in the whole image. Images were acquired at five independent  
515 regions and analyzed. The color threshold function of ImageJ was applied to measure macrophages,  
516 fibroblasts, the fibrin clot area, and cell size of cultured fibroblasts.

517 **Immunoblotting.** For western blot analysis, tissue was frozen, crushed, and then lysed in T-PER  
518 Tissue Protein Extraction Regent (Thermo Scientific, 78510) in accordance with the manufacturer's  
519 protocol. The protein concentration was measured with the Nano-Drop 8000 spectrophotometer and  
520 lysates containing 50 µg protein each were separated by PAGE, transferred onto a polyvinylidene  
521 difluoride membrane, and then analyzed by immunoblotting using the primary and second  
522 antibodies shown in the Supplemental Table 3. Protein bands were visualized with a Super Signal  
523 West Pico Substrate (Thermo Scientific, 34077) in accordance with the manufacturer's instructions.

524 **Statistics.** All statistical tests were performed with GraphPad Prism software version 8 (GraphPad  
525 Software). Data represent the mean ± SEM. For comparisons between multiple groups,  
526 repeated-measures analysis of variance (ANOVA) or one- or two-way ANOVA was performed,  
527 followed by Bonferroni's post-hoc test. Two groups were compared with the two-tailed, unpaired  
528 Student's *t*-test. Cardiac rupture rates were compared by the  $\chi^2$  test and survival curves were  
529 compared by the log-rank test.

530

#### 531 **Data availability**

532

533 Microarray data: Gene Expression Omnibus GSE69879

534 (<https://www.ncbi.nlm.nih.gov/geo/query/acc.cgi?acc=GSE69879>)

535

#### 536 **Acknowledgments**

537

538 This project was funded by the Uehara Memorial Foundation, SENSHIN Medical Research  
539 Foundation, a Grant-in-Aid for Scientific Research (C), the Mochida Memorial Foundation for  
540 Medical and Pharmaceutical Research, Takeda Science Foundation, and Public Trust Surgery

541 Research Fund. We thank Ellen Knapp, PhD, and Mitchell Arico from Edanz Group  
542 (<https://en-author-services.edanz.com/ac>) for editing a draft of this manuscript.

543

#### 544 **Author contributions**

545

546 MS and KS conceived and designed the study. MS conducted most of the experiments and  
547 acquired the data with support from AY and KS. All authors participated in the analysis and  
548 interpretation of the data. MS and KS primarily wrote and edited the manuscript with input from all  
549 other authors.

550

#### 551 **Conflict of interest statement**

552 The authors have declared that no conflicts of interest exist.

553

#### 554 **References**

555 Acosta JC, Banito A, Wuestefeld T, Georgilis A, Janich P, Morton JP, Athineos D, Kang TW,  
556 Lasitschka F, Andrulis M, Pascual G, Morris KJ, Khan S, Jin H, Dharmalingam G, Snijders AP,  
557 Carroll T, Capper D, Pritchard C, Inman GJ et al. (2013) A complex secretory program  
558 orchestrated by the inflammasome controls paracrine senescence. *Nat Cell Biol* 15: 978-90  
559 Alam P, Haile B, Arif M, Pandey R, Rokvic M, Nieman M, Maliken BD, Paul A, Wang YG,  
560 Sadayappan S, Ahmed RPH, Kanisicak O (2019) Inhibition of Senescence-Associated Genes  
561 Rb1 and Meis2 in Adult Cardiomyocytes Results in Cell Cycle Reentry and Cardiac Repair  
562 Post-Myocardial Infarction. *J Am Heart Assoc* 8: e012089  
563 Alcorta DA, Xiong Y, Phelps D, Hannon G, Beach D, Barrett JC (1996) Involvement of the  
564 cyclin-dependent kinase inhibitor p16 (INK4a) in replicative senescence of normal human  
565 fibroblasts. *Proc Natl Acad Sci U S A* 93: 13742-7  
566 Aurora AB, Porrello ER, Tan W, Mahmoud AI, Hill JA, Bassel-Duby R, Sadek HA, Olson EN  
567 (2014) Macrophages are required for neonatal heart regeneration. *J Clin Invest* 124: 1382-92  
568 Baliga RR, Pimental DR, Zhao YY, Simmons WW, Marchionni MA, Sawyer DB, Kelly RA  
569 (1999) NRG-1-induced cardiomyocyte hypertrophy. Role of PI-3-kinase, p70(S6K), and  
570 MEK-MAPK-RSK. *Am J Physiol* 277: H2026-37  
571 Bersell K, Arab S, Haring B, Kuhn B (2009) Neuregulin1/ErbB4 signaling induces  
572 cardiomyocyte proliferation and repair of heart injury. *Cell* 138: 257-70  
573 Bladier C, Wolvetang EJ, Hutchinson P, de Haan JB, Kola I (1997) Response of a primary  
574 human fibroblast cell line to H2O2: senescence-like growth arrest or apoptosis? *Cell Growth*  
575 *Differ* 8: 589-98  
576 Childs BG, Durik M, Baker DJ, van Deursen JM (2015) Cellular senescence in aging and  
577 age-related disease: from mechanisms to therapy. *Nat Med* 21: 1424-35

578 Childs BG, Li H, van Deursen JM (2018) Senescent cells: a therapeutic target for  
579 cardiovascular disease. *J Clin Invest* 128: 1217-1228  
580 Coppe JP, Desprez PY, Krtolica A, Campisi J (2010) The senescence-associated secretory  
581 phenotype: the dark side of tumor suppression. *Annu Rev Pathol* 5: 99-118  
582 Deng C, Zhang P, Harper JW, Elledge SJ, Leder P (1995) Mice lacking p21CIP1/WAF1  
583 undergo normal development, but are defective in G1 checkpoint control. *Cell* 82: 675-84  
584 Dickstein K, Cohen-Solal A, Filippatos G, McMurray JJ, Ponikowski P, Poole-Wilson PA,  
585 Stromberg A, van Veldhuisen DJ, Atar D, Hoes AW, Keren A, Mebazaa A, Nieminen M,  
586 Priori SG, Swedberg K, Guidelines ESCCfP (2008) ESC Guidelines for the diagnosis and  
587 treatment of acute and chronic heart failure 2008: the Task Force for the Diagnosis and  
588 Treatment of Acute and Chronic Heart Failure 2008 of the European Society of Cardiology.  
589 Developed in collaboration with the Heart Failure Association of the ESC (HFA) and endorsed  
590 by the European Society of Intensive Care Medicine (ESICM). *Eur Heart J* 29: 2388-442  
591 ElZarrad MK, Mukhopadhyay P, Mohan N, Hao E, Dokmanovic M, Hirsch DS, Shen Y,  
592 Pacher P, Wu WJ (2013) Trastuzumab alters the expression of genes essential for cardiac  
593 function and induces ultrastructural changes of cardiomyocytes in mice. *PLoS One* 8: e79543  
594 Fuller SJ, Sivarajah K, Sugden PH (2008) ErbB receptors, their ligands, and the consequences  
595 of their activation and inhibition in the myocardium. *J Mol Cell Cardiol* 44: 831-54  
596 Gelb BD, Tartaglia M (2011) RAS signaling pathway mutations and hypertrophic  
597 cardiomyopathy: getting into and out of the thick of it. *J Clin Invest* 121: 844-7  
598 Gemberling M, Karra R, Dickson AL, Poss KD (2015) Nrg1 is an injury-induced  
599 cardiomyocyte mitogen for the endogenous heart regeneration program in zebrafish. *Elife* 4  
600 Gould KE, Taffet GE, Michael LH, Christie RM, Konkol DL, Pocius JS, Zachariah JP,  
601 Chaupin DF, Daniel SL, Sandusky GE, Jr., Hartley CJ, Entman ML (2002) Heart failure and  
602 greater infarct expansion in middle-aged mice: a relevant model for postinfarction failure. *Am J*  
603 *Physiol Heart Circ Physiol* 282: H615-21  
604 Hayakawa K, Takemura G, Kanoh M, Li Y, Koda M, Kawase Y, Maruyama R, Okada H,  
605 Minatoguchi S, Fujiwara T, Fujiwara H (2003) Inhibition of granulation tissue cell apoptosis  
606 during the subacute stage of myocardial infarction improves cardiac remodeling and  
607 dysfunction at the chronic stage. *Circulation* 108: 104-9  
608 Hedhli N, Huang Q, Kalinowski A, Palmeri M, Hu X, Russell RR, Russell KS (2011)  
609 Endothelium-derived neuregulin protects the heart against ischemic injury. *Circulation* 123:  
610 2254-62  
611 Ikeda N, Asano K, Kikuchi K, Uchida Y, Ikegami H, Takagi R, Yotsumoto S, Shibuya T,  
612 Makino-Okamura C, Fukuyama H, Watanabe T, Ohmuraya M, Araki K, Nishitai G, Tanaka M  
613 (2018) Emergence of immunoregulatory Ym1(+)Ly6C(hi) monocytes during recovery phase  
614 of tissue injury. *Sci Immunol* 3  
615 Kirabo A, Ryzhov S, Gupte M, Sengsayadeth S, Gumina RJ, Sawyer DB, Galindo CL (2017)  
616 Neuregulin-1beta induces proliferation, survival and paracrine signaling in normal human  
617 cardiac ventricular fibroblasts. *J Mol Cell Cardiol* 105: 59-69  
618 Krizhanovsky V, Yon M, Dickins RA, Hearn S, Simon J, Miething C, Yee H, Zender L, Lowe  
619 SW (2008) Senescence of activated stellate cells limits liver fibrosis. *Cell* 134: 657-67  
620 Kuramochi Y, Cote GM, Guo X, Lebrasseur NK, Cui L, Liao R, Sawyer DB (2004) Cardiac  
621 endothelial cells regulate reactive oxygen species-induced cardiomyocyte apoptosis through  
622 neuregulin-1beta/erbB4 signaling. *J Biol Chem* 279: 51141-7  
623 Leicht M, Greipel N, Zimmer H (2000) Comitogenic effect of catecholamines on rat cardiac  
624 fibroblasts in culture. *Cardiovasc Res* 48: 274-84  
625 Lemmens K, Doggen K, De Keulenaer GW (2007) Role of neuregulin-1/ErbB signaling in  
626 cardiovascular physiology and disease: implications for therapy of heart failure. *Circulation*  
627 116: 954-60

628 Long X, Boluyt MO, Hipolito ML, Lundberg MS, Zheng JS, O'Neill L, Cirielli C, Lakatta EG,  
629 Crow MT (1997) p53 and the hypoxia-induced apoptosis of cultured neonatal rat cardiac  
630 myocytes. *J Clin Invest* 99: 2635-43  
631 Meyer D, Yamaai T, Garratt A, Riethmacher-Sonnenberg E, Kane D, Theill LE, Birchmeier C  
632 (1997) Isoform-specific expression and function of neuregulin. *Development* 124: 3575-86  
633 Munoz-Espin D, Serrano M (2014) Cellular senescence: from physiology to pathology. *Nat*  
634 *Rev Mol Cell Biol* 15: 482-96  
635 Olayioye MA, Neve RM, Lane HA, Hynes NE (2000) The ErbB signaling network: receptor  
636 heterodimerization in development and cancer. *EMBO J* 19: 3159-67  
637 Park S, Jiang Z, Mortenson ED, Deng L, Radkevich-Brown O, Yang X, Sattar H, Wang Y,  
638 Brown NK, Greene M, Liu Y, Tang J, Wang S, Fu YX (2010) The therapeutic effect of  
639 anti-HER2/neu antibody depends on both innate and adaptive immunity. *Cancer Cell* 18:  
640 160-70  
641 Pascual-Gil S, Abizanda G, Iglesias E, Garbayo E, Prosper F, Blanco-Prieto MJ (2019) NRG1  
642 PLGA MP locally induce macrophage polarisation toward a regenerative phenotype in the  
643 heart after acute myocardial infarction. *J Drug Target* 27: 573-581  
644 Polizzotti BD, Ganapathy B, Walsh S, Choudhury S, Ammanamanchi N, Bennett DG, dos  
645 Remedios CG, Haubner BJ, Penninger JM, Kuhn B (2015) Neuregulin stimulation of  
646 cardiomyocyte regeneration in mice and human myocardium reveals a therapeutic window. *Sci*  
647 *Transl Med* 7: 281ra45  
648 Polyak K, Xia Y, Zweier JL, Kinzler KW, Vogelstein B (1997) A model for p53-induced  
649 apoptosis. *Nature* 389: 300-5  
650 Sasaki M, Miyakoshi M, Sato Y, Nakanuma Y (2010) Modulation of the microenvironment by  
651 senescent biliary epithelial cells may be involved in the pathogenesis of primary biliary  
652 cirrhosis. *J Hepatol* 53: 318-25  
653 Serrano M, Lin AW, McCurrach ME, Beach D, Lowe SW (1997) Oncogenic ras provokes  
654 premature cell senescence associated with accumulation of p53 and p16INK4a. *Cell* 88:  
655 593-602  
656 Sharpless NE, Sherr CJ (2015) Forging a signature of in vivo senescence. *Nat Rev Cancer* 15:  
657 397-408  
658 Shih H, Lee B, Lee RJ, Boyle AJ (2011) The aging heart and post-infarction left ventricular  
659 remodeling. *J Am Coll Cardiol* 57: 9-17  
660 Shinde AV, Frangogiannis NG (2014) Fibroblasts in myocardial infarction: a role in  
661 inflammation and repair. *J Mol Cell Cardiol* 70: 74-82  
662 Shintani Y, Kapoor A, Kaneko M, Smolenski RT, D'Acquisto F, Coppin SR, Harada-Shoji N,  
663 Lee HJ, Thiemermann C, Takashima S, Yashiro K, Suzuki K (2013) TLR9 mediates cellular  
664 protection by modulating energy metabolism in cardiomyocytes and neurons. *Proc Natl Acad*  
665 *Sci U S A* 110: 5109-14  
666 Shiraishi M, Shintani Y, Shintani Y, Ishida H, Saba R, Yamaguchi A, Adachi H, Yashiro K,  
667 Suzuki K (2016) Alternatively activated macrophages determine repair of the infarcted adult  
668 murine heart. *J Clin Invest* 126: 2151-66  
669 Stein GH, Drullinger LF, Soulard A, Dulic V (1999) Differential roles for cyclin-dependent  
670 kinase inhibitors p21 and p16 in the mechanisms of senescence and differentiation in human  
671 fibroblasts. *Mol Cell Biol* 19: 2109-17  
672 Suzuki T, Arumugam P, Sakagami T, Lachmann N, Chalk C, Sallese A, Abe S, Trapnell C,  
673 Carey B, Moritz T, Malik P, Lutzko C, Wood RE, Trapnell BC (2014) Pulmonary macrophage  
674 transplantation therapy. *Nature* 514: 450-4  
675 Takemura G, Ohno M, Hayakawa Y, Misao J, Kanoh M, Ohno A, Uno Y, Minatoguchi S,  
676 Fujiwara T, Fujiwara H (1998) Role of apoptosis in the disappearance of infiltrated and  
677 proliferated interstitial cells after myocardial infarction. *Circ Res* 82: 1130-8

678 Tano N, Narita T, Kaneko M, Ikebe C, Coppens SR, Campbell NG, Shiraishi M, Shintani Y,  
679 Suzuki K (2014) Epicardial placement of mesenchymal stromal cell-sheets for the treatment of  
680 ischemic cardiomyopathy; in vivo proof-of-concept study. *Mol Ther* 22: 1864-71  
681 Uray IP, Connelly JH, Thomazy V, Shipley GL, Vaughn WK, Frazier OH, Taegtmeyer H,  
682 Davies PJ (2002) Left ventricular unloading alters receptor tyrosine kinase expression in the  
683 failing human heart. *J Heart Lung Transplant* 21: 771-82  
684 van den Borne SW, Diez J, Blankesteijn WM, Verjans J, Hofstra L, Narula J (2010)  
685 Myocardial remodeling after infarction: the role of myofibroblasts. *Nat Rev Cardiol* 7: 30-7  
686 van Deursen JM (2014) The role of senescent cells in ageing. *Nature* 509: 439-46  
687 Vermeulen Z, Hervent AS, Dugaucquier L, Vandekerckhove L, Rombouts M, Beyens M,  
688 Schrijvers DM, De Meyer GRY, Maudsley S, De Keulenaer GW, Segers VFM (2017)  
689 Inhibitory actions of the NRG-1/ErbB4 pathway in macrophages during tissue fibrosis in the  
690 heart, skin, and lung. *Am J Physiol Heart Circ Physiol* 313: H934-H945  
691 Wang YA, Elson A, Leder P (1997) Loss of p21 increases sensitivity to ionizing radiation and  
692 delays the onset of lymphoma in atm-deficient mice. *Proc Natl Acad Sci U S A* 94: 14590-5  
693 Yu JS, Cui W (2016) Proliferation, survival and metabolism: the role of PI3K/AKT/mTOR  
694 signalling in pluripotency and cell fate determination. *Development* 143: 3050-60  
695 Yutzey KE (2015) Regenerative biology: Neuregulin 1 makes heart muscle. *Nature* 520: 445-6  
696 Zhu F, Li Y, Zhang J, Piao C, Liu T, Li HH, Du J (2013) Senescent cardiac fibroblast is critical  
697 for cardiac fibrosis after myocardial infarction. *PLoS One* 8: e74535  
698

## 699 **Figure legends**

700

### 701 **Figure 1. Cardiac fibroblasts undergo apoptosis and senescence after MI.**

702 A. Double immunofluorescence staining of Thy1 and cleaved caspase 3 (CC-3) demonstrated that  
703 apoptosis of cardiac fibroblasts in the infarct area was exacerbated at post-myocardial infarction  
704 (MI) days 7 and 28 compared with the remote area. Scale bars: 100  $\mu$ m.  $n = 4$  in each group.  
705 B. SA- $\beta$ -gal staining demonstrated that spindle-shaped senescent fibroblasts had accumulated in the  
706 infarct area. Scale bars: 100  $\mu$ m.  
707 C. Quantitative reverse transcription-polymerase chain reaction analysis showed post-MI upregulation  
708 of senescence-associated genes in the infarct area at post-MI day 7 compared with the non-MI  
709 heart (day 0).  $n = 4$  in each group. Data represent the mean  $\pm$  SEM. \* $P < 0.05$ , \*\* $P < 0.01$ , \*\*\* $P <$   
710 0.005 versus the remote area; # $P < 0.05$ , ## $P < 0.01$ , ### $P < 0.005$  versus the non-MI heart; one-way  
711 ANOVA.

712

713 **Figure 2. *Nrg1* expression upregulates in the infarcted myocardium, while cardiac fibroblasts**  
714 **express *Nrg1* receptors.**



715 A. qRT-PCR analysis confirmed post-MI upregulation of *Nrg1*. Expression levels relative to the intact  
716 heart are presented.  $n = 4$  in each group.

717 B. Immunohistochemistry demonstrated that the ratios of ErbB2<sup>+</sup> and ErbB4<sup>+</sup> fibroblasts (percentage  
718 of Thy1<sup>+</sup>ErbB2/4<sup>+</sup> myofibroblasts/percentage of Thy1<sup>+</sup> fibroblasts) were markedly increased in the  
719 post-MI heart. Scale bars: 100  $\mu\text{m}$ .  $n = 4$  in each group. Data represent the mean  $\pm$  SEM. \* $P < 0.05$ ,  
720 \*\* $P < 0.01$ , \*\*\* $P < 0.005$  versus the remote area; # $P < 0.05$ , ## $P < 0.01$ , ### $P < 0.005$  versus the  
721 non-MI heart; one-way ANOVA.

722

723 **Figure 3. M2-like macrophages accumulate in the infarct and express *Nrg1*.**

724 A. Immunohistochemistry showed that accumulation of CD206<sup>+</sup> M2-like macrophages was increased  
725 in the infarcted area with a post-myocardial infarction (MI) peak on day 7. Scale bars: 100  $\mu\text{m}$ .  $n =$   
726 4 in each group. Data represent the mean  $\pm$  SEM. \* $P < 0.05$ , \*\* $P < 0.01$ , \*\*\* $P < 0.005$  versus the  
727 remote area; # $P < 0.05$ , ## $P < 0.01$ , ### $P < 0.005$  versus the non-MI heart; one-way ANOVA.

728 B. Flow cytometric analysis confirmed that CD206<sup>+</sup>F4/80<sup>+</sup>CD11b<sup>+</sup> M2-like macrophages were  
729 present in normal, non-myocardial infarction (non-MI), and day 7 post-MI hearts of adult  
730 C57BL/6 mice.  $n = 6$  in each group.

731 C. Microarray analysis demonstrated that M2 macrophages after myocardial infarction (M2: MI) had  
732 a different expression profile from that of M2: non-MI macrophages. Scatter plot revealed that 70  
733 genes were upregulated and 39 were downregulated in M2: MI macrophages compared with M2:  
734 non-MI macrophages. The upregulated genes included neuregulin 1 (*Nrg1*).

735 D. Quantitative reverse transcription-polymerase chain reaction analysis confirmed post-MI  
736 upregulation of *Nrg1* in CD206<sup>+</sup>F4/80<sup>+</sup>CD11b<sup>+</sup> cardiac M2-like macrophages [M2: MI].  $n = 4$  in  
737 each group. Data represent the mean  $\pm$  SEM. # $P < 0.05$ , ## $P < 0.01$ , ### $P < 0.005$  versus M2:  
738 non-MI macrophages; two-tailed, unpaired Student's *t*-test.

739 E. Double immunofluorescence staining of CD206<sup>+</sup> M2-like macrophages and neuregulin 1 (*Nrg1*)  
740 demonstrated *Nrg1* expression on the surface of CD206<sup>+</sup> M2-like macrophages. Scale bars: 100  
741  $\mu\text{m}$ .  $n = 4$  in each group.

742

743 **Figure 4. Bone marrow-derived macrophages attenuate  $H_2O_2$ -induced apoptosis and senescence of**  
744 **cardiac fibroblasts via *Nrg1* secretion.**

745 A. Representative images from phase-contrast microscopy. Treatment with a hydrogen peroxide  
746 ( $H_2O_2$ ) solution changed the spindle-shaped appearance to a significantly enlarged, flattened  
747 morphology. After addition of bone marrow-derived macrophages (BMDMs), fibroblasts returned  
748 to the spindle-shaped morphology. After addition of an anti-ErbB antibody (Ab), fibroblasts  
749 displayed the same gross morphology as senescent fibroblasts treated with  $H_2O_2$ . Recombinant  
750 neuregulin 1 (*Nrg1*) similarly changed the gross morphology to a spindle shape. Scale bars: 100  
751  $\mu\text{m}$ .  $n = 4$  in each group.

752 B. SA- $\beta$ -gal staining showed that senescence of fibroblasts was exacerbated in coculture with  $H_2O_2$ ,  
753 but not with  $H_2O_2$  and BMDMs. This suppression of senescence was attenuated by coculture with  
754 the anti-ErbB Ab. *Nrg1* suppressed fibroblast senescence. Scale bars: 100  $\mu\text{m}$ .  $n = 4$  in each group

755 C. Apoptosis of cardiac fibroblasts (ratio of cleaved caspase 3<sup>+</sup>DAPI<sup>+</sup> fibroblasts to DAPI<sup>+</sup>  
756 fibroblasts) was increased in coculture with  $H_2O_2$ , but decreased in cardiac fibroblasts cocultured  
757 with BMDMs. This decrease in apoptosis was eliminated by the anti-ErbB Ab. *Nrg1* suppressed  
758 apoptosis. Nuclei were counterstained with 4',6-diamidino-2-phenylindole (DAPI).  $n = 4$  in each  
759 group. Scale bars: 100  $\mu\text{m}$ .

760 D. Proliferation of cardiac fibroblasts (ratio of Ki-67<sup>+</sup> and DAPI<sup>+</sup> fibroblasts to DAPI<sup>+</sup> fibroblasts)  
761 was decreased in cocultures with  $H_2O_2$ , but increased in cardiac fibroblasts cocultured BMDMs.  
762 This increase in proliferation was eliminated by the anti-ErbB Ab. *Nrg1* accelerated proliferation.  
763 Nuclei were counterstained with DAPI. Scale bars: 50  $\mu\text{m}$ .  $n = 4$  in each group. Data represent the  
764 mean  $\pm$  SEM. <sup>#</sup> $P < 0.05$  versus control, <sup>\*</sup> $P < 0.05$  versus  $H_2O_2$ , <sup>‡</sup> $P < 0.05$  versus  $H_2O_2$ +BMDMs,  
765 <sup>†</sup> $P < 0.05$  versus  $H_2O_2$ +BMDMs+Ab, <sup>§</sup> $P < 0.05$  versus  $H_2O_2$ +*Nrg1*; one-way ANOVA.

766

767 **Figure 5. BMDMs promote fibroblast activation and collagen synthesis.**

768 A–C. Representative images of immunocytochemical staining for (A) vimentin and  $\alpha$ SMA, (B)  
769 vimentin and collagen I, and (C) vimentin and collagen III. The staining was performed at 48  
770 hours after the start of culture.

771 A. Activation of cardiac fibroblasts (ratio of vimentin<sup>+</sup> and  $\alpha$ SMA<sup>+</sup> myofibroblasts to vimentin<sup>+</sup>  
772 fibroblasts) was equal in cocultures with hydrogen peroxide (H<sub>2</sub>O<sub>2</sub>), but markedly increased in  
773 cardiac fibroblasts cocultured with bone marrow-derived macrophages (BMDMs). This increase in  
774 activation was accelerated by the anti-ErbB antibody (Ab). Addition of recombinant neuregulin 1  
775 (Nrg1) did not affect activation of cardiac fibroblasts. Scale bars: 100  $\mu$ m.  $n = 4$  in each group.

776 B. Collagen I synthesis was equal in cocultures with H<sub>2</sub>O<sub>2</sub>, but significantly increased in cardiac  
777 fibroblasts cocultured with BMDMs. This increase in production was enhanced by the anti-ErbB  
778 Ab. Addition of Nrg1 did not affect collagen I synthesis. Scale bars: 100  $\mu$ m.  $n = 4$  in each group.

779 C. Collagen III synthesis exhibited a similar tendency as collagen I synthesis. Scale bars: 100  $\mu$ m.  $n =$   
780 4 in each group. Data represent the mean  $\pm$  SEM. <sup>#</sup> $P < 0.05$  versus control, <sup>\*</sup> $P < 0.05$  versus H<sub>2</sub>O<sub>2</sub>,  
781 <sup>‡</sup> $P < 0.05$  versus H<sub>2</sub>O<sub>2</sub>+BMDMs, <sup>†</sup> $P < 0.05$  versus H<sub>2</sub>O<sub>2</sub>+BMDMs+Ab, <sup>§</sup> $P < 0.05$  versus  
782 H<sub>2</sub>O<sub>2</sub>+Nrg1; one-way ANOVA.

783

784 **Figure 6. PI3K/Akt signaling pathway is associated with BMDM-attenuated apoptosis and**  
785 **senescence of cardiac fibroblasts through Nrg1.**

786 A. Representative bands of PI3K, pPI3K, Akt, pAkt, and  $\beta$ -actin in cardiac fibroblasts at 48 hours  
787 after coculture with or without hydrogen peroxide (H<sub>2</sub>O<sub>2</sub>)/bone marrow-derived macrophages  
788 (BMDMs)/anti-ErbB antibody (Ab)/recombinant neuregulin 1 (Nrg1). Bar graph shows  
789 quantification of relative pPI3k/PI3k and pAkt/Akt. H<sub>2</sub>O<sub>2</sub> alone did not affect activation of  
790 PI3K/AKT signaling in fibroblasts. Addition of BMDMs significantly activated the signaling  
791 pathway and addition of the anti-ErbB Ab impaired the activation. Addition of Nrg1 re-stimulated  
792 the signaling pathway.  $n = 4$  in each group.

793 B. Quantitative reverse transcription-polymerase chain reaction analysis of cardiac fibroblasts at 48  
794 hours after coculture with or without H<sub>2</sub>O<sub>2</sub>/BMDMs/anti-ErbB Ab/Nrg1. The expression levels of

795 senescence-associated genes (*p53*, *p21*, *p16*, and *SA-β-gal*) were increased in cocultures with H<sub>2</sub>O<sub>2</sub>  
796 with a time lapse, but decreased in cocultures with BMDMs. Addition of the anti-ErbB Ab  
797 increased such expression and addition of Nrg1 suppressed it. *n* = 4 in each group.

798 C. Expression levels of cell cycle-associated genes (*Cdk4*, *Cdk6*, *Cdk2*, and *Ki-67*) were suppressed in  
799 cocultures with H<sub>2</sub>O<sub>2</sub>, but recovered in cocultures with BMDMs. Addition of the anti-ErbB Ab  
800 decreased such expression and addition of Nrg1 recovered the expression. *n* = 4 in each group.

801 D. Expression of the p53 suppressor gene (*MDM2*) was significantly increased in coculture with  
802 BMDMs. *n* = 4 in each group.

803 E. Expression levels of cell survival-associated gene (*mTOR*) were suppressed in cocultures with  
804 H<sub>2</sub>O<sub>2</sub>, but recovered in cocultures with BMDMs. Addition of the anti-ErbB Ab re-suppressed the  
805 expression and addition of Nrg1 increased it again.

806 F. Expression of senescence-associated secretory phenotype-associated gene (*IL-6*) was significantly  
807 increased in cocultures with BMDMs and after addition of the anti-ErbB Ab. *n* = 4 in each group.

808 Data represent the mean ± SEM. #*P* < 0.05 versus control, \**P* < 0.05 versus H<sub>2</sub>O<sub>2</sub>, †*P* < 0.05 versus  
809 H<sub>2</sub>O<sub>2</sub>+BMDMs, †*P* < 0.05 versus H<sub>2</sub>O<sub>2</sub>+BMDMs+Ab, §*P* < 0.05 versus H<sub>2</sub>O<sub>2</sub>+Nrg1; one-way  
810 ANOVA.

811 G. Schematic representation and overview of the Nrg1/PI3K/AKT pathway. Ischemia contributes to  
812 the development of cellular damage, which leads to senescence, cell cycle arrest, and apoptosis.  
813 Nrg1 binding to coreceptor ErbB2/ErbB4 leads to activation of PI3K/AKT and inactivation of p53  
814 and p21. Arrowheads indicate stimulation, whereas hammerheads represent inhibition.

815

816 **Figure 7. *In vivo* inhibition of Nrg1 signaling promotes apoptosis and senescence of cardiac**  
817 ***fibroblasts.***

818 A–C. Quantitative reverse transcription-polymerase chain reaction analysis showed post-myocardial  
819 infarction (MI) upregulation of (A) apoptosis-associated gene *Casp3* and (B and C)  
820 senescence-associated genes (*SA-β-gal*, *p53*, *p21*, and *p16*) in mice after intraperitoneal  
821 trastuzumab injection compared with controls. *n* = 4 in each group.

822 D. Double immunofluorescence staining of Thy1 and cleaved caspase 3 (CC-3) demonstrated that the  
823 ratio of apoptotic cardiac fibroblasts in the infarct area was increased in mice after intraperitoneal  
824 trastuzumab injection compared with controls at post-myocardial infarction (MI) days 7, 14, and  
825 28. Arrow shows Thy1<sup>+</sup>CC-3<sup>+</sup> cells. Scale bars: 100  $\mu$ m.  $n = 4$  in each group.  
826 E. SA- $\beta$ -gal staining demonstrated that senescence of cardiac cells in the infarct area was exacerbated  
827 in mice after intraperitoneal trastuzumab injection compared with controls at post-myocardial  
828 infarction (MI) days 7 and 14. Scale bars: 20  $\mu$ m.  $n = 4$  in each group. Data represent the mean  $\pm$   
829 SEM. \* $P < 0.05$ , \*\* $P < 0.01$ , \*\*\* $P < 0.005$  versus each group; # $P < 0.05$ , ## $P < 0.01$ , ### $P < 0.005$   
830 versus the non-MI heart; one-way ANOVA.

831

832 **Figure 8. *In vivo inhibition of Nrg1 signaling activates cardiac fibroblasts and exacerbates fibrosis.***

833 A. Masson trichrome staining demonstrated that deposition of collagen fibrils was increased in the  
834 post-MI infarct area with a time lapse. Intraperitoneal trastuzumab injection significantly increased  
835 collagen fibrils in the infarct area. Scale bars: 100  $\mu$ m.  $n = 4$  in each group.  
836 B. Double immunofluorescence staining of Thy1 and  $\alpha$ SMA showed increased accumulation and  
837 activation of cardiac fibroblasts in the infarct area in the trastuzumab group compared with the  
838 control group. Scale bars: 100  $\mu$ m.  $n = 4$  in each group.  
839 C. Quantitative reverse transcription-polymerase chain reaction (qRT-PCR) analysis showed post-MI  
840 upregulation of fibrosis-associated genes ( $\alpha$ SMA, *Coll1a1*, and *Col3a1*) in mice after intraperitoneal  
841 trastuzumab injection compared with controls.  $n = 4$  in each group. Data represent the mean  $\pm$   
842 SEM. \* $P < 0.05$ , \*\* $P < 0.01$ , \*\*\* $P < 0.005$  versus each group; # $P < 0.05$ , ## $P < 0.01$ , ### $P < 0.005$   
843 versus the non-MI heart; one-way ANOVA.

844

845 **Figure 9. *In vivo inhibition of Nrg1 signaling exacerbates myocardial inflammation and promotes***  
846 ***accumulation of M2-like macrophages.***

847 A. Quantitative reverse transcription-polymerase chain reaction analysis showed post-myocardial  
848 infarction (MI) upregulation of senescence-associated secretory phenotype-associated genes (CCl3,

849 *IL-6*, and *TNF*) in mice after intraperitoneal trastuzumab injection compared with controls.  $n = 4$  in  
850 each group.

851 B. Immunohistochemistry showed increased accumulation of CD206<sup>+</sup> M2-like macrophages in the  
852 infarct area with a post-myocardial infarction (MI) peak on day 7. Intraperitoneal trastuzumab  
853 injection significantly accelerated accumulation of CD206<sup>+</sup> M2-like macrophages in the infarct  
854 area. Scale bars: 100  $\mu$ m.  $n = 4$  in each group. Data represent the mean  $\pm$  SEM. \* $P < 0.05$ , \*\* $P <$   
855 0.01, \*\*\* $P < 0.005$  versus each group; # $P < 0.05$  ## $P < 0.01$ , ### $P < 0.005$  versus the non-MI heart;  
856 one-way ANOVA.

857

858 **Figure 10. Schematic illustration of the inter-relationship between M2-like macrophages and**  
859 **cardiac fibroblasts.**

860 Ischemic injury contributes to the development of cellular senescence and apoptosis. Senescent  
861 cells, including cardiac fibroblasts, show the senescence-associated secretory phenotype (SASP),  
862 which activate M2-like macrophages. M2-like macrophages suppress senescence and apoptosis of  
863 fibroblasts and simultaneously accelerate proliferation. Osteopontin-mediated induction of  
864 fibroblasts into myofibroblasts promotes fibrosis (11).

865

866 **Expanded View Figure legends**

867

868 **Expanded View Figure 1. Myocardial infarction promotes activation of cardiac fibroblasts and**  
869 **exacerbates inflammation.**

870 A. Masson trichrome staining showed that deposition of collagen fibrils was increased in the infarct  
871 area with a time lapse after myocardial infarction (MI). Scale bars: 100  $\mu$ m.  $n = 4$  in each group.

872 B. Quantitative reverse transcription-polymerase chain reaction analysis (qRT-PCR) analysis showed  
873 post-MI upregulation of fibrosis-associated genes in the infarct area at post-MI day 7 compared  
874 with the non-MI heart (day 0).  $n = 4$  in each group.

875 C. Immunohistochemistry showed that accumulation of Thy1<sup>+</sup> fibroblasts was increased in the infarct  
876 area with a post-myocardial infarction (MI) peak on day 7. Scale bars: 100  $\mu$ m.  $n=4$  in each group.

877 D. Activated cardiac fibroblasts (Thy1<sup>+</sup> and  $\alpha$ SMA<sup>+</sup> fibroblasts) were significantly increased in the  
878 infarct area with a post-MI peak on day 7. Scale bars: 100  $\mu$ m. n=4 in each group.

879 E. qRT-PCR analysis showed post-MI upregulation of inflammatory genes in the infarct area at  
880 post-MI day 7 compared with the non-MI heart (day 0).  $n = 4$  in each group. Data represent the  
881 mean  $\pm$  SEM. \* $P < 0.05$ , \*\* $P < 0.01$ , \*\*\* $P < 0.005$  versus the remote area; # $P < 0.05$ , ## $P < 0.01$ ,  
882 ### $P < 0.005$  versus the non-MI heart; one-way analysis of variance (ANOVA).

883

884 **Expanded View Figure 2. Cardiac M2-like macrophages strengthen their reparative ability.**

885 A. CD206<sup>+</sup>F4/80<sup>+</sup>CD11b<sup>+</sup> M2-like macrophages were isolated from intact hearts [non-MI (M2)] and  
886 day 7 post-MI hearts [MI (M2)] by fluorescence-activated cell sorting and subjected to microarray  
887 analysis. Macrophages from different origins showed distinct molecular signatures.

888 B. Signal intensity revealed that, among genes encoding secreted proteins, 13 were upregulated and  
889 three were downregulated in MI (M2) macrophages compared with non-MI (M2) macrophages.  
890 The upregulated genes included anti-inflammatory and anti-apoptotic genes as well as genes  
891 associated with cell survival and tissue repair.

892 C. Gene set enrichment analysis showed that CD206<sup>+</sup>F4/80<sup>+</sup>CD11b<sup>+</sup> M2-like macrophages in the  
893 post-MI heart were significantly relevant to regulation of cell survival.

894

895 **Expanded View Figure 3. H<sub>2</sub>O<sub>2</sub> induces apoptosis and senescence of cardiac fibroblasts.**

896 A. Schematic of the coculture protocol. Hydrogen peroxide (H<sub>2</sub>O<sub>2</sub>)-treated cardiac fibroblasts were  
897 cocultured with or without bone marrow-derived macrophages (BMDMs) in a Boyden chamber  
898 culture system. An anti-ErbB antibody (Ab) and/or recombinant neuregulin 1 (Nrg1) were added  
899 to the relevant groups. The anti-ErbB Ab was added at the beginning of the coculture with  
900 BMDMs.

901 B. Representative images of immunocytochemical staining for p16. Primary cardiac fibroblasts were  
902 cocultured with or without H<sub>2</sub>O<sub>2</sub>. Nuclei were counterstained with 4',6-diamidino-2-phenylindole  
903 (DAPI). Scale bars: 50  $\mu$ m.

904 C. Quantitative reverse transcription-polymerase chain reaction analysis confirmed increases in  
905 expression of *SA- $\beta$ -gal*, *p16*, and *p21* in cardiac fibroblasts cocultured with H<sub>2</sub>O<sub>2</sub>. *n* = 4 in each  
906 group. Data represent the mean  $\pm$  SEM. <sup>#</sup>*P* < 0.05, <sup>##</sup>*P* < 0.01, <sup>###</sup>*P* < 0.005 versus normal cardiac  
907 fibroblasts (control); two-tailed, unpaired Student's *t*-test.

908

909 **Expanded View Figure 4. Bone marrow-derived macrophages cocultured with H<sub>2</sub>O<sub>2</sub>-treated**  
910 **cardiac fibroblasts exhibit an M2-like macrophage phenotype.**

911 A. Representative images of immunocytochemical staining for CD68, CD14, F4/80, CD4, CD8, and  
912 CD31 in bone marrow-derived macrophages (BMDMs). Nuclei were counterstained with  
913 4',6-diamidino-2-phenylindole (DAPI). Scale bars: 50  $\mu$ m.

914 B. Quantitative reverse transcription-polymerase chain reaction analysis confirmed increases in  
915 expression of pan-macrophage marker genes (*F4/80* and *CD11b*) and M2-like macrophage marker  
916 genes (*CD206*, *Arg1*, and *Fizz1*) in BMDMs cocultured with H<sub>2</sub>O<sub>2</sub>-induced senescent fibroblasts.  
917 Conversely, expression of M1 macrophage markers (*CD11c* and *MHC-II*) was decreased. *n* = 4 in  
918 each group. Data represent the mean  $\pm$  SEM. <sup>#</sup>*P* < 0.05, <sup>##</sup>*P* < 0.01, <sup>###</sup>*P* < 0.005 versus BMDMs  
919 before coculture (control); two-tailed, unpaired Student's *t*-test.

920

921 **Expanded View Figure 5. *Nrg1* expression upregulates in bone marrow-derived macrophages,**  
922 **while cultured fibroblasts express *Nrg1* receptors.**

923 A. Quantitative reverse transcription-polymerase chain reaction (qRT-PCR) analysis confirmed an  
924 increase in expression of *Nrg1* in bone marrow-derived macrophages (BMDMs) cocultured with  
925 hydrogen peroxide (H<sub>2</sub>O<sub>2</sub>)-induced senescent fibroblasts (H<sub>2</sub>O<sub>2</sub>) compared with BMDMs  
926 cocultured with normal fibroblasts (control). *n* = 4 in each group.

927 B. qRT-PCR analysis confirmed increases in expression of *ErbB2* and *ErbB4* in fibroblasts cocultured  
928 with H<sub>2</sub>O<sub>2</sub> (H<sub>2</sub>O<sub>2</sub>) compared with normal fibroblasts (control). *n* = 4 in each group. Data represent  
929 the mean  $\pm$  SEM. <sup>#</sup>*P* < 0.05, <sup>##</sup>*P* < 0.01, <sup>###</sup>*P* < 0.005 versus control; two-tailed, unpaired Student's  
930 *t*-test.



931 C. Double immunofluorescence staining showed that H<sub>2</sub>O<sub>2</sub> enhanced expression of both ErbB2 and  
932 ErbB4 receptors. Nuclei were counterstained with DAPI. Scale bars: 10 μm.

933

934 **Expanded View Figure 6. Expression of fibroblast activation-associated gene *Spp1* increases in**  
935 ***BMDMs*.**

936 A and B. Quantitative reverse transcription-polymerase chain reaction analysis confirmed that  
937 expression of a fibroblast activation-associated gene (osteopontin [*Opn*]) (A) was increased in  
938 bone marrow-derived macrophages (BMDMs) cocultured with hydrogen peroxide (H<sub>2</sub>O<sub>2</sub>)-induced  
939 senescent fibroblasts. Conversely, the expression of other known fibroblast activation-associated  
940 genes (transforming growth factor-beta [*Tgfb*] and platelet-derived growth factor subunit A  
941 [*Pdgfa*]) (B) did not increase. *n* = 4 in each group. Data represent the mean ± SEM. <sup>#</sup>*P* < 0.05, <sup>##</sup>*P*  
942 < 0.01, <sup>###</sup>*P* < 0.005 versus BMDMs before coculture (control); two-tailed, unpaired Student's  
943 *t*-test.

944

945 **Expanded View Figure 7. Trastuzumab does not affect apoptosis, senescence, inflammation, or**  
946 ***fibroblast activation in the intact heart*.**

947 A–D. Quantitative reverse transcription-polymerase chain reaction analysis showed no changes in  
948 mRNA expression levels of (A) an apoptosis-associated gene (*Casp3*), (B) senescence-associated  
949 genes (*SA-β-gal*, *p53*, *p21*, and *p16*), (C) senescence-associated secretory phenotype-associated  
950 genes (*CCL3*, *IL-6*, and *TNF*), or (D) a fibroblast activation-associated gene (*αSMA*) and  
951 fibrosis-associated genes (*Colla1* and *Col3a1*) in mice after intraperitoneal trastuzumab injection  
952 compared with controls. *n* = 4 in each group.

953

954 **Expanded View Figure 8. Trastuzumab does not affect the survival rate or body weight after MI.**

955 A. Trastuzumab was injected on the fourth, fifth, and sixth day after induction of myocardial  
956 infarction (MI). Samples were collected on the seventh, 12<sup>th</sup>, and 28<sup>th</sup> day after induction of MI.  
957 B and C. Intraperitoneal trastuzumab injection did not affect the survival ratio or (C) change in body  
958 weight of MI mice. *n* = 12 in each group.

959

960 **Expanded View Figure 9. *In vivo inhibition of Nrg1 signaling promotes apoptosis and senescence***  
961 ***of cardiac fibroblasts even in the remote area.***

962 A–C. Quantitative reverse transcription-polymerase chain reaction analysis showed post-myocardial  
963 infarction (MI) upregulation of (A) an apoptosis-associated gene (*Casp3*) and (B and C)  
964 senescence-associated genes (*SA-β-gal* and *p53*) in mice after intraperitoneal trastuzumab injection  
965 compared with controls.  $n = 4$  in each group.

966 D. Double immunofluorescence staining of Thy1 and cleaved caspase 3 (CC-3) demonstrated that the  
967 ratio of apoptotic cardiac fibroblasts in the infarct area was increased in mice after intraperitoneal  
968 trastuzumab injection compared with controls at post-myocardial infarction (MI) days 7, 14, and  
969 28. Arrow shows Thy1<sup>+</sup>CC-3<sup>+</sup> cells. Scale bars: 100 μm.  $n = 4$  in each group.

970 E. SA-β-gal staining demonstrated that senescence of cardiac cells in the remote area was  
971 significantly exacerbated in mice after intraperitoneal trastuzumab injection compared with  
972 controls at post-myocardial infarction (MI) days 14 and 28. Scale bars: 20 μm.  $n = 4$  in each group.  
973 Data represent the mean ± SEM. \* $P < 0.05$ , \*\* $P < 0.01$ , \*\*\* $P < 0.005$  versus each group; # $P <$   
974  $0.05$ , ## $P < 0.01$ , ### $P < 0.005$  versus the non-MI heart; one-way ANOVA.

975

976 **Expanded View Figure 10. *In vivo inhibition of Nrg1 signaling exacerbates myocardial***  
977 ***inflammation and promotes accumulation of M2-like macrophages even in the remote area.***

978 A. Quantitative reverse transcription-polymerase chain reaction analysis showed post-myocardial  
979 infarction (MI) upregulation of senescence-associated secretory phenotype-associated genes (*CCl3*  
980 and *TNF*) in mice after intraperitoneal trastuzumab injection compared with controls.  $n = 4$  in each  
981 group.

982 B. Immunohistochemistry showed that intraperitoneal injection of the anti-human epidermal growth  
983 factor receptor type 2 (HER2) monoclonal antibody trastuzumab significantly accelerated  
984 accumulation of CD206<sup>+</sup> M2-like macrophages in the remote area with a post-myocardial  
985 infarction (MI) peak on day 14. Scale bars: 100 μm.  $n=4$  in each group. Data represent the mean ±

986 SEM. \* $P < 0.05$ , \*\* $P < 0.01$ , \*\*\* $P < 0.005$  versus each group; # $P < 0.05$ , ## $P < 0.01$ , ### $P < 0.005$   
987 versus the non-MI heart; one-way ANOVA.

988

989 **Expanded View Figure 11. *In vivo inhibition of Nrg1 signaling activates cardiac fibroblasts even***  
990 ***in the remote area.***

991 A. Double immunofluorescence staining of Thy1 and  $\alpha$ SMA showed increases in accumulation and  
992 activation of cardiac fibroblasts in the remote area of the trastuzumab (HER2) group compared  
993 with the control group. Scale bars: 100  $\mu\text{m}$ .  $n = 4$  in each group.

994 B. Quantitative reverse transcription-polymerase chain reaction analysis showed post-MI upregulation  
995 of fibrosis-associated genes (*Colla1* and *Col3a1*) in mice after intraperitoneal trastuzumab  
996 injection compared with controls.  $n = 4$  in each group. Data represent the mean  $\pm$  SEM. \* $P < 0.05$ ,  
997 \*\* $P < 0.01$ , \*\*\* $P < 0.005$  versus each group; # $P < 0.05$  ## $P < 0.01$ , ### $P < 0.005$  versus the non-MI  
998 heart; one-way ANOVA.

999

1000 **Expanded View Figure 12. *In vivo inhibition of Nrg1 signaling exacerbates fibrosis even in the***  
1001 ***remote area.***

1002 Masson trichrome staining showed that intraperitoneal trastuzumab injection significantly increased  
1003 collagen fibrils in the remote area. Scale bars: 100  $\mu\text{m}$ .  $n = 4$  in each group. Data represent the mean  $\pm$   
1004 SEM. \* $P < 0.05$ , \*\* $P < 0.01$ , \*\*\* $P < 0.005$  versus each group; # $P < 0.05$  ## $P < 0.01$ , ### $P < 0.005$   
1005 versus the non-MI heart; one-way ANOVA.

**Figure 1.**

**A**

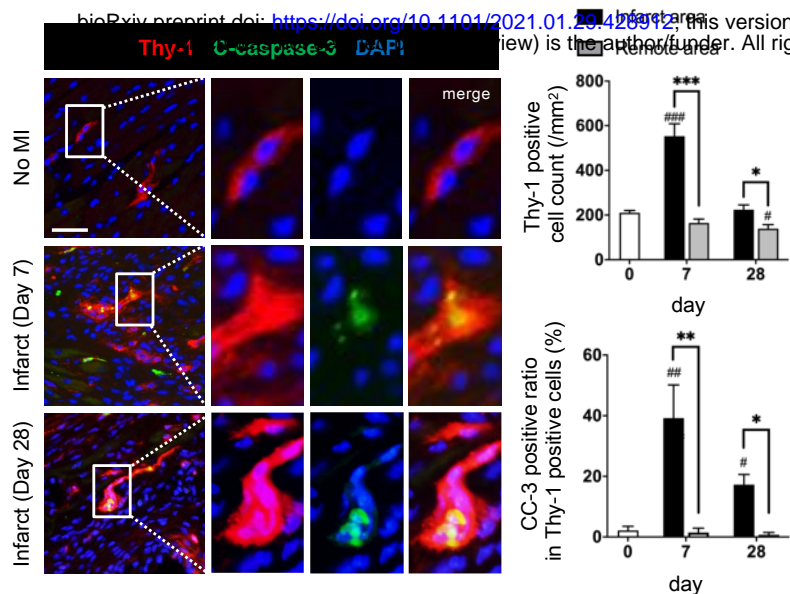

**B**

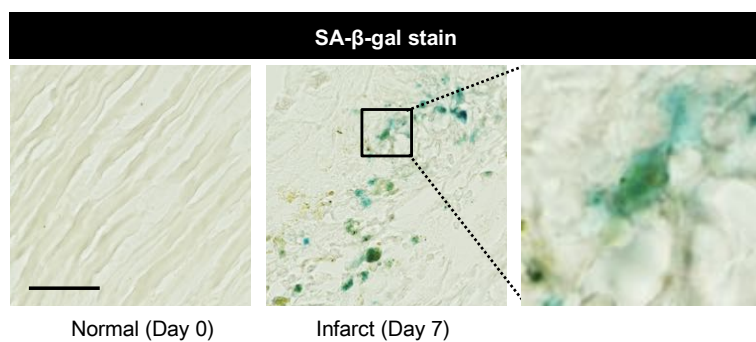

**C**

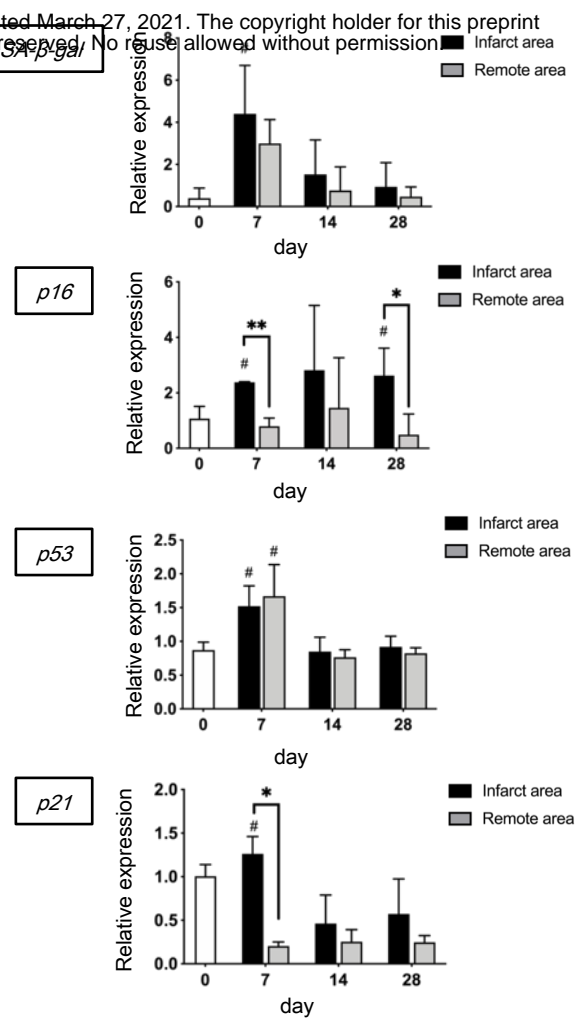

**Figure 2.**

**A**

bioRxiv preprint doi: <https://doi.org/10.1101/2021.01.29.428912>; this version posted March 27, 2021. The copyright holder for this preprint (which was not certified by peer review) is the author/funder. All rights reserved. No reuse allowed without permission.

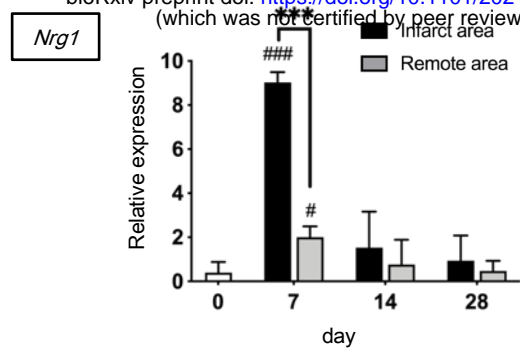

**B**

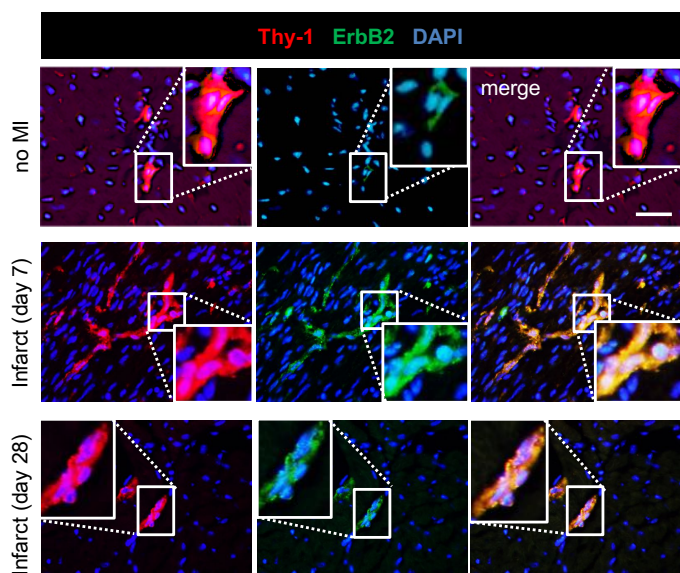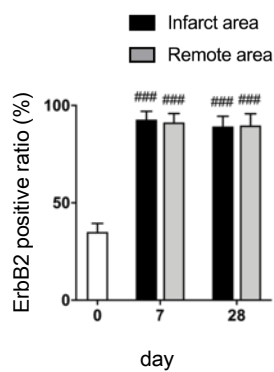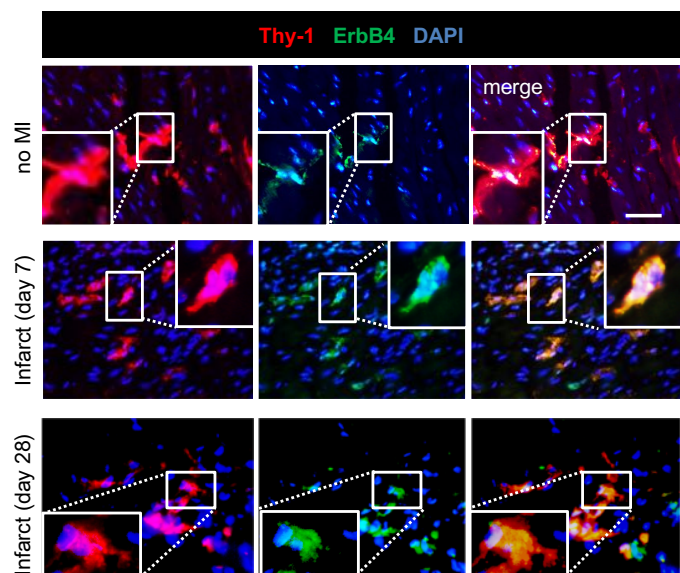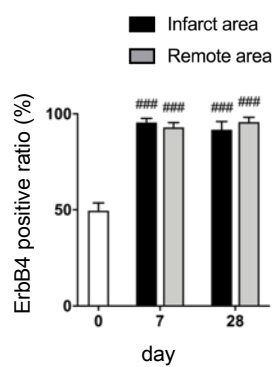

**Figure 3.**

**A**

bioRxiv preprint doi: <https://doi.org/10.1101/2021.01.29.428912>; this version posted March 27, 2021. The copyright holder for this preprint (which was not certified by peer review) is the author/funder. All rights reserved. No reuse allowed without permission.

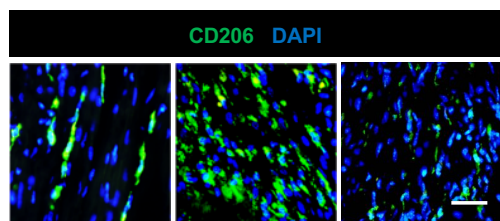

Normal (Day 0)    Infarct (Day 7)    Infarct (Day 28)

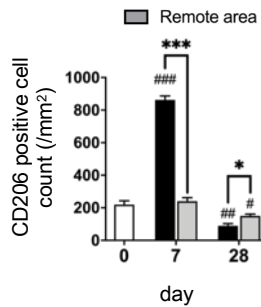

**B**

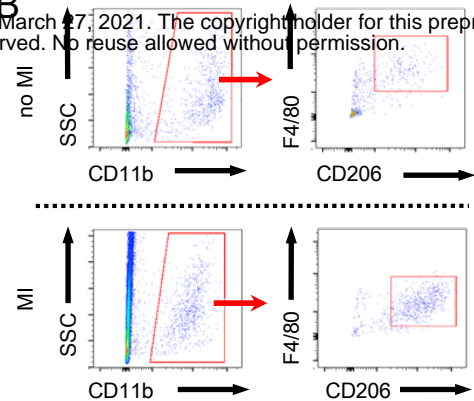

**C**

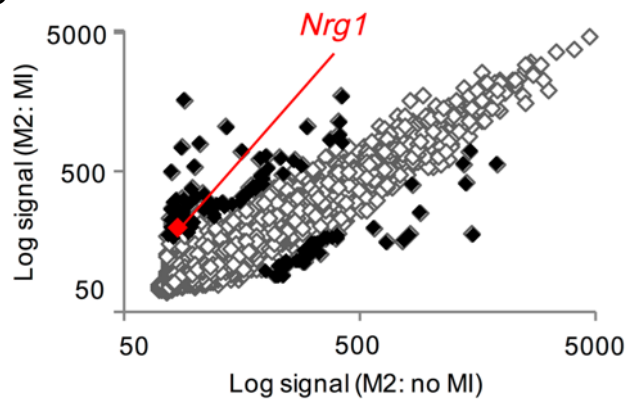

**D**

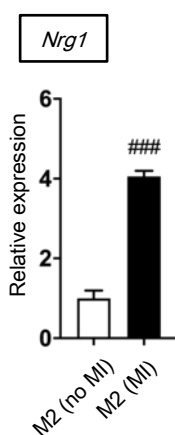

**E**

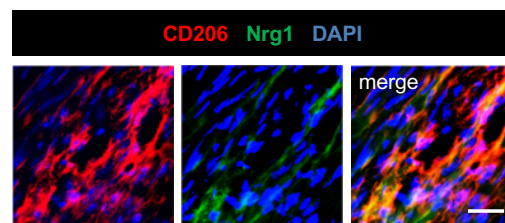

**Figure 4.**

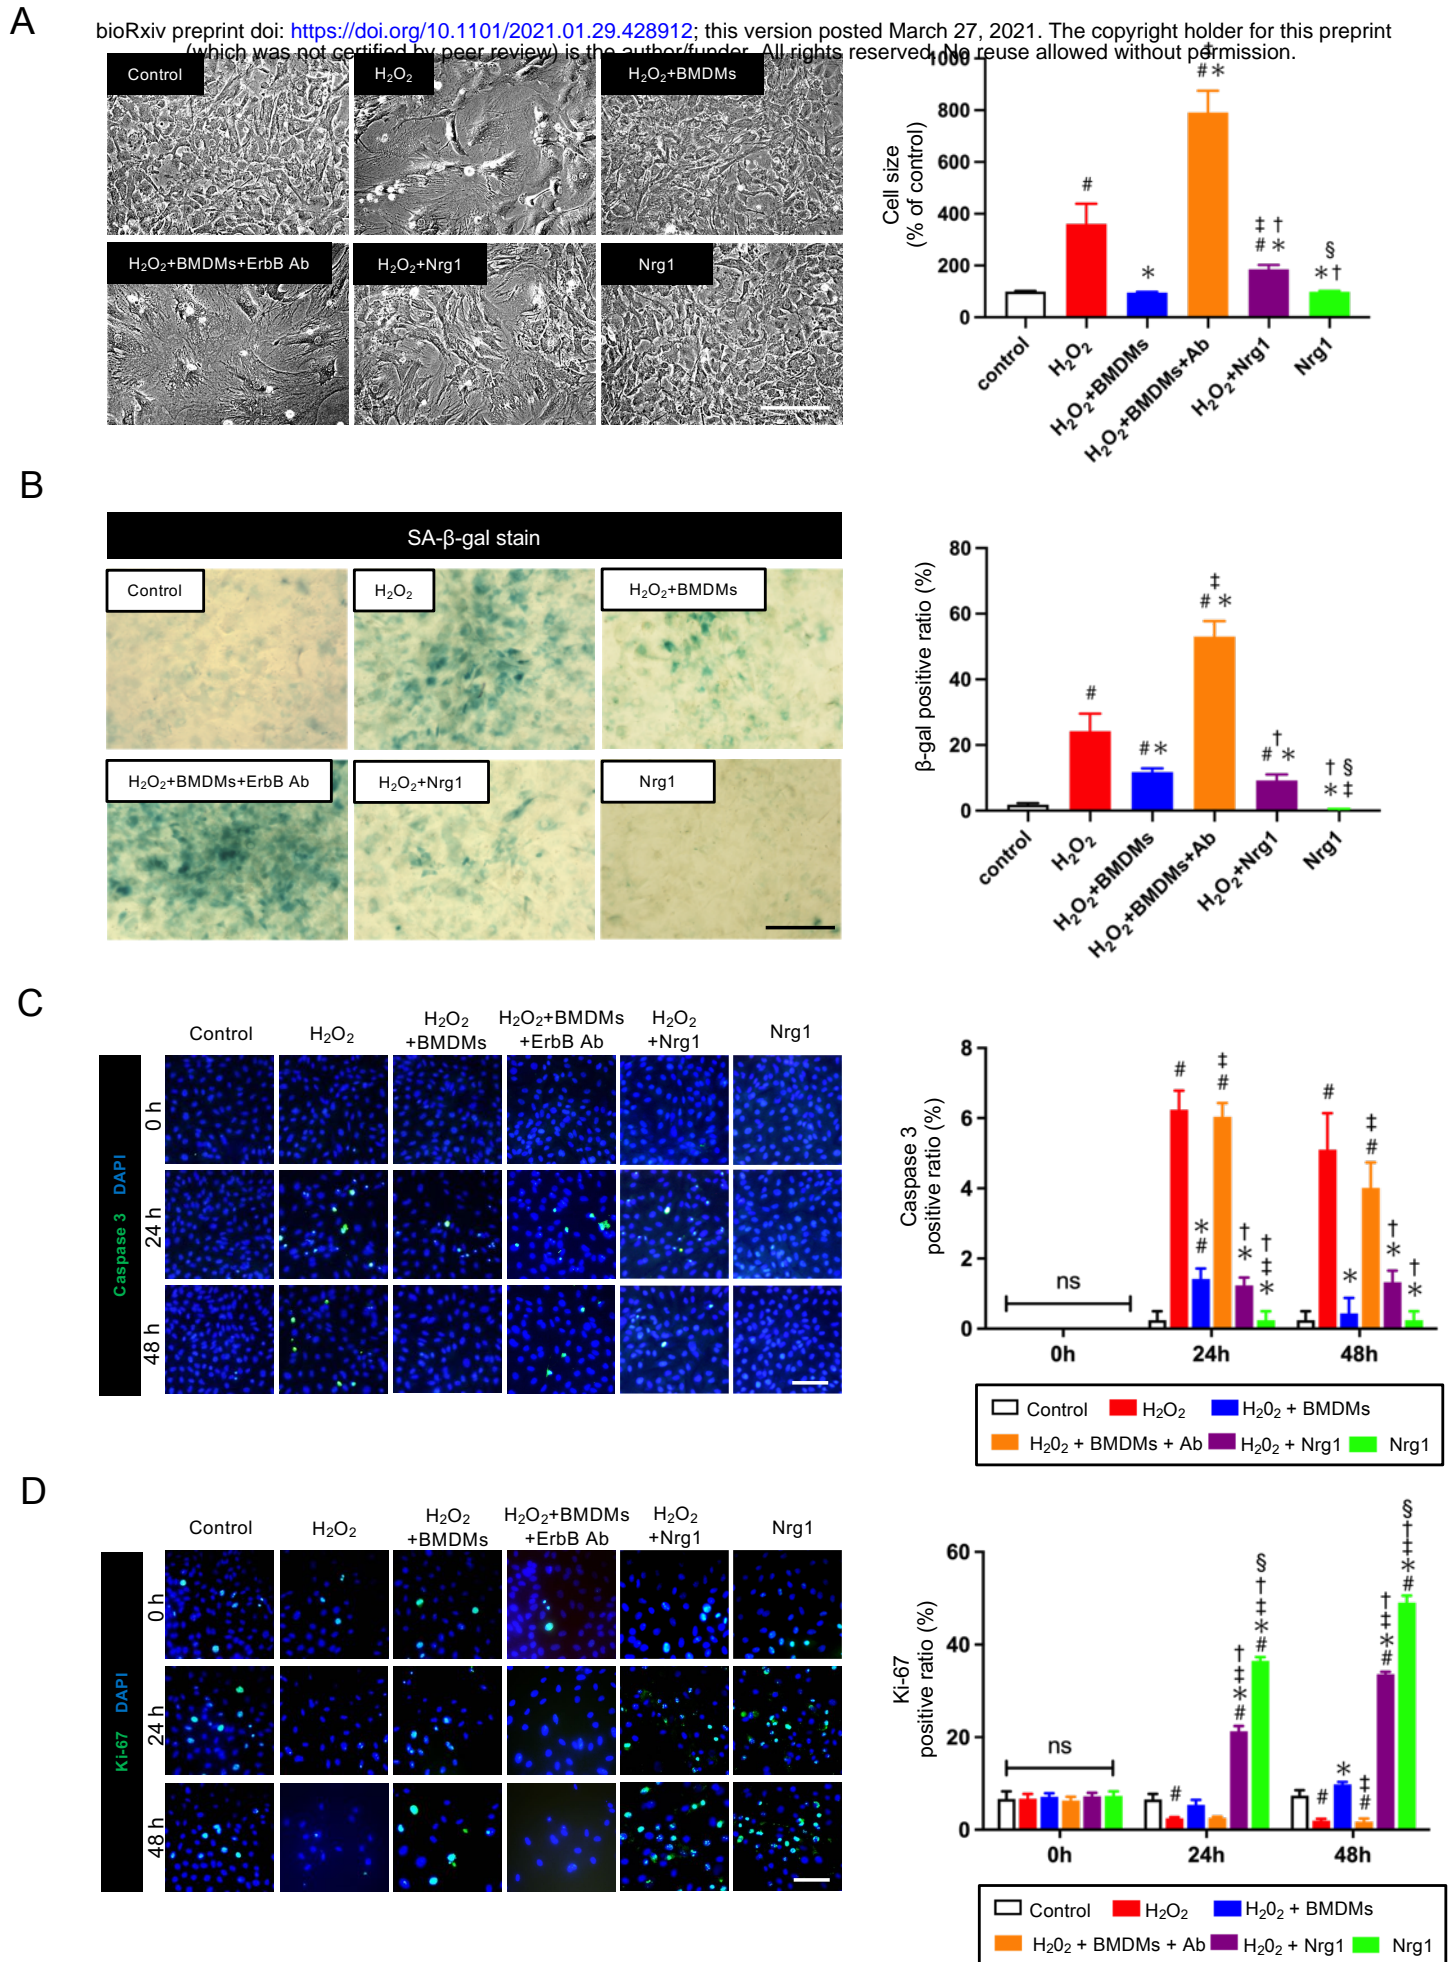

**Figure 5.**

**A**

bioRxiv preprint doi: <https://doi.org/10.1101/2021.01.29.428912>; this version posted March 27, 2021. The copyright holder for this preprint (which was not certified by peer review) is the author/funder. All rights reserved. No reuse allowed without permission.

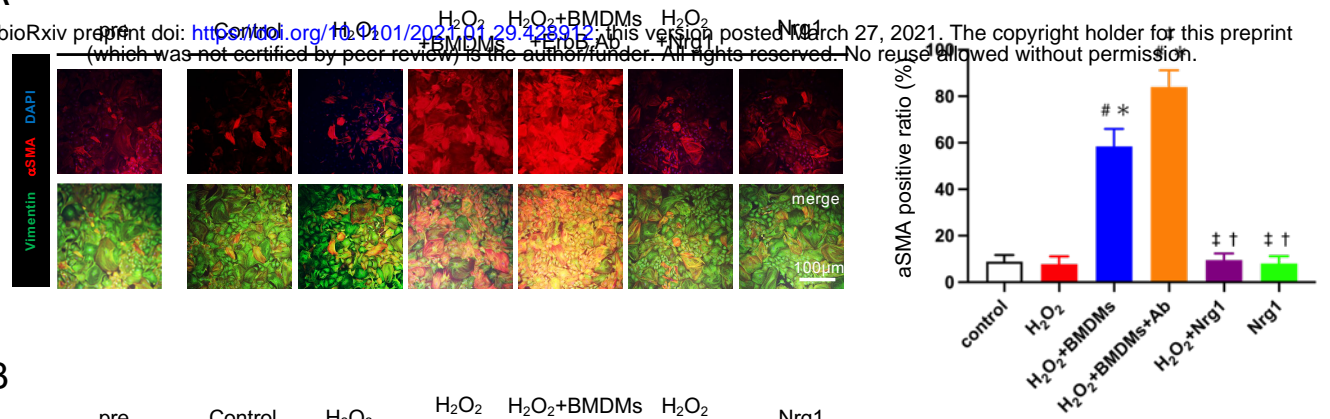

**B**

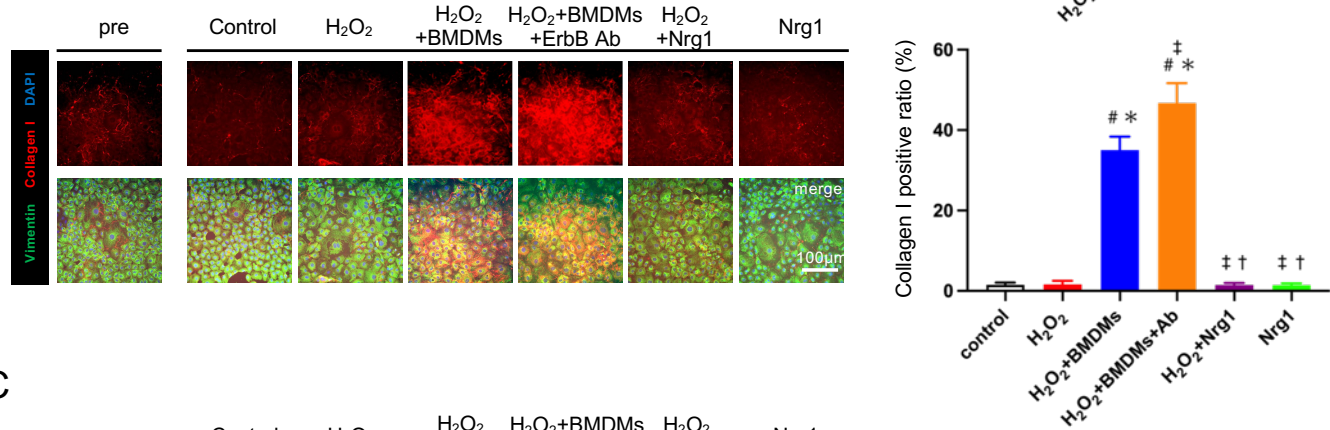

**C**

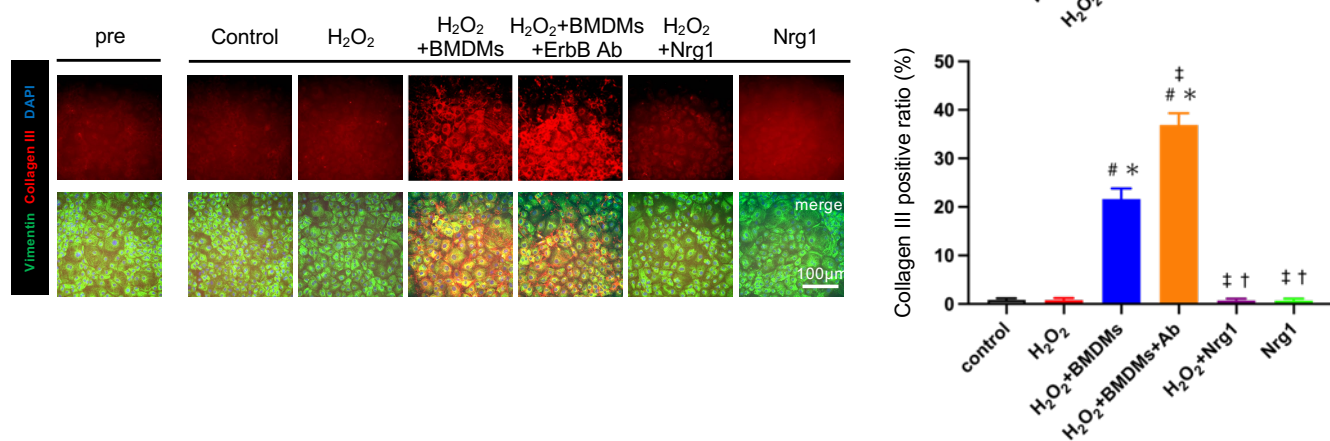



**Figure 6.**

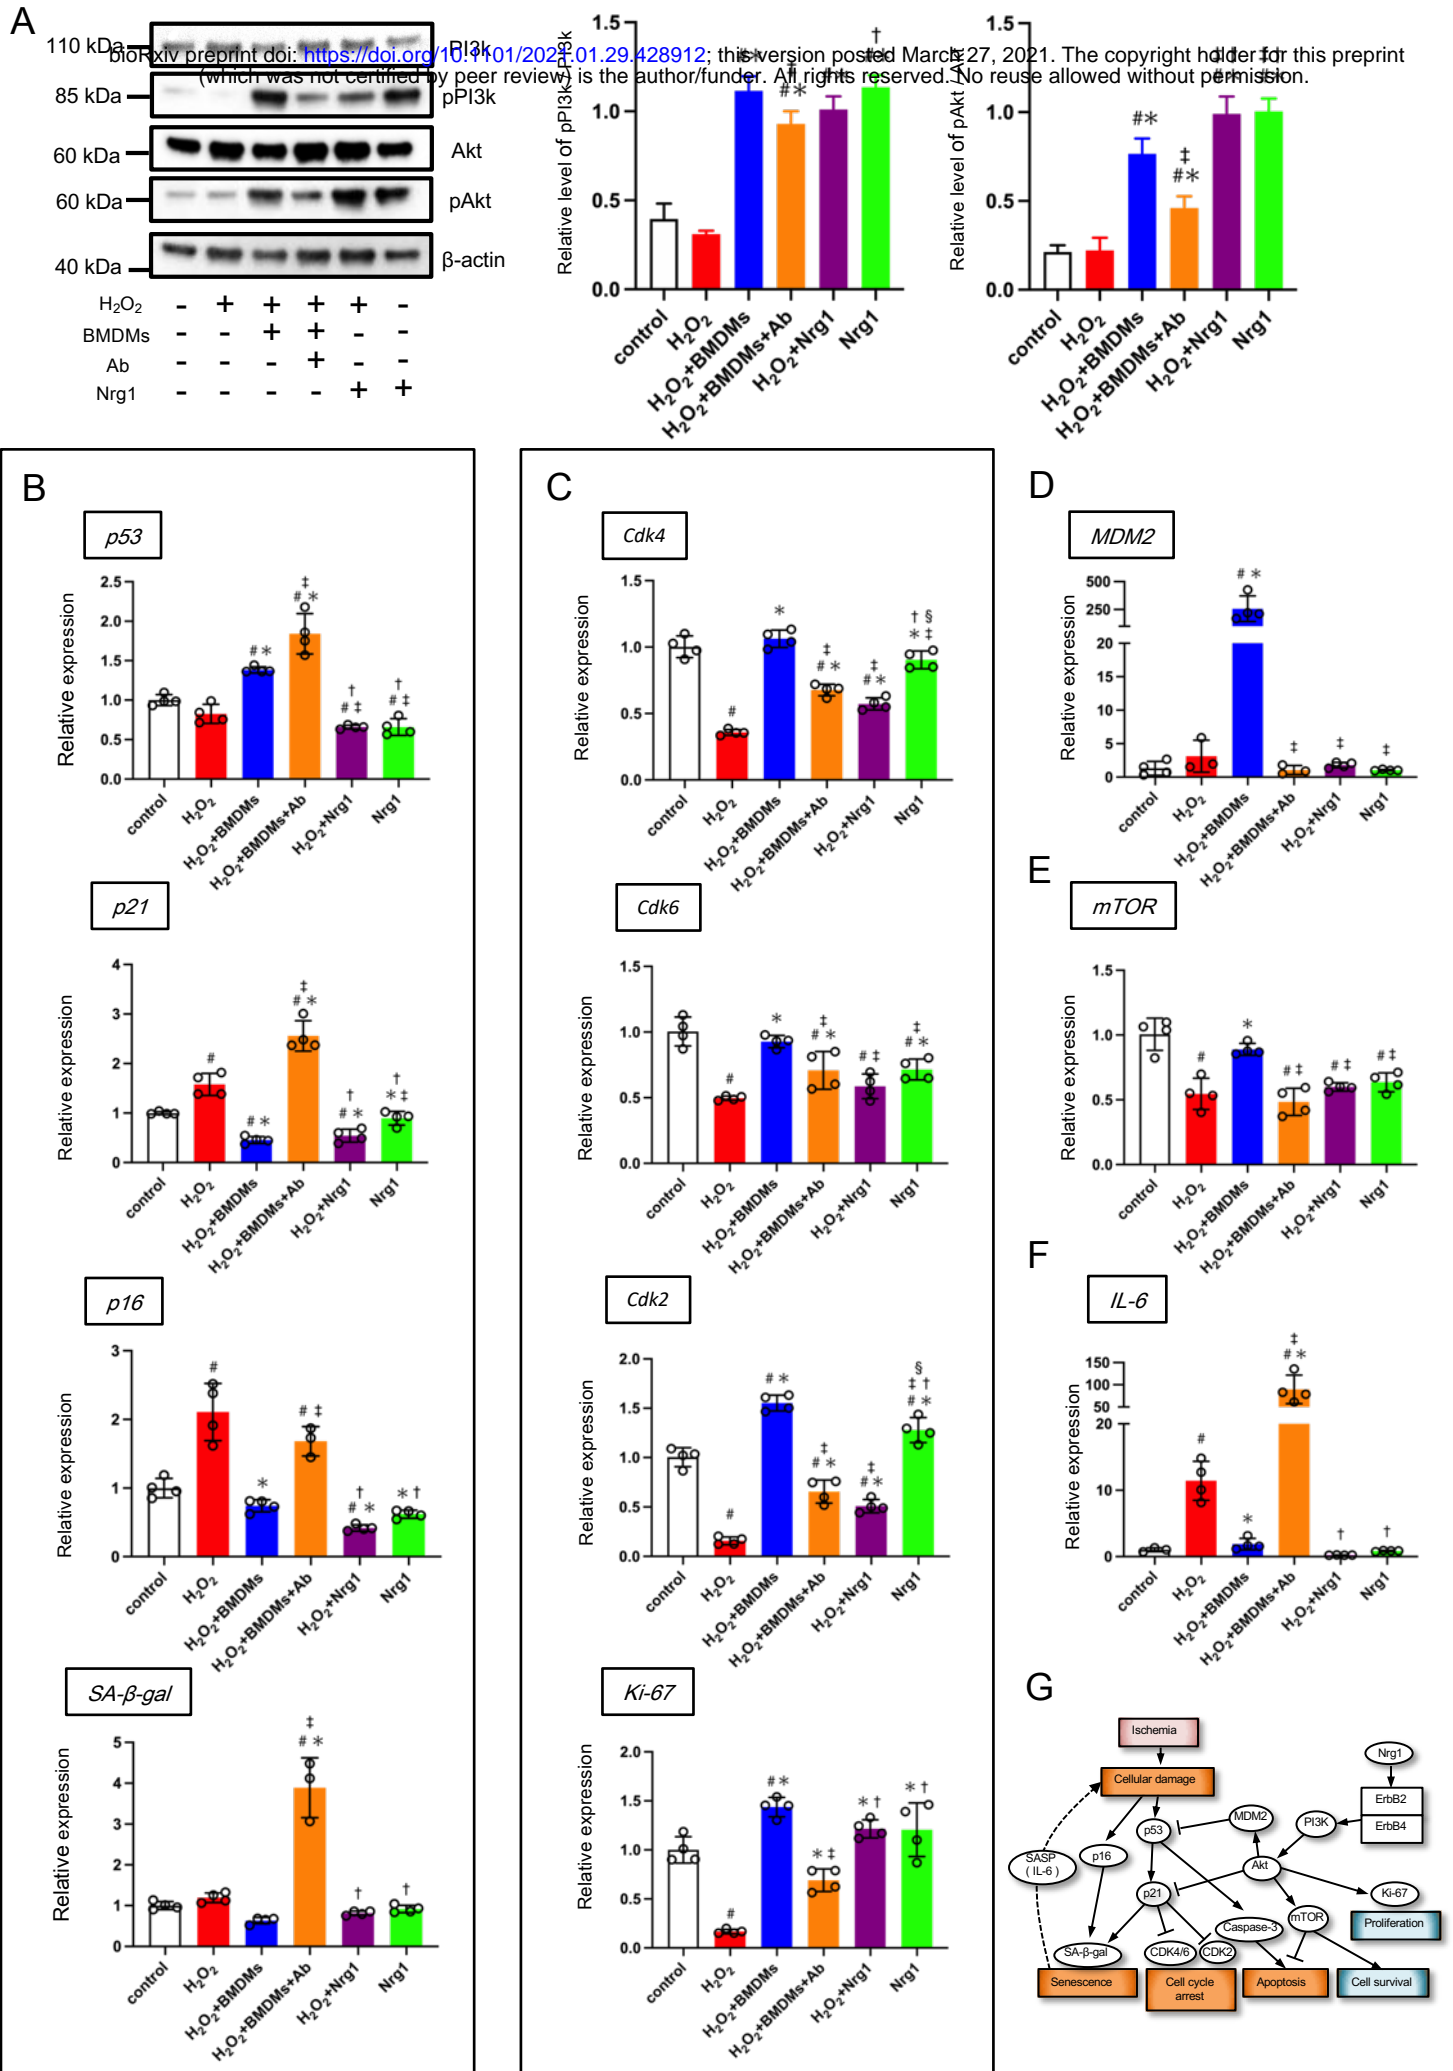

**Figure 7.**

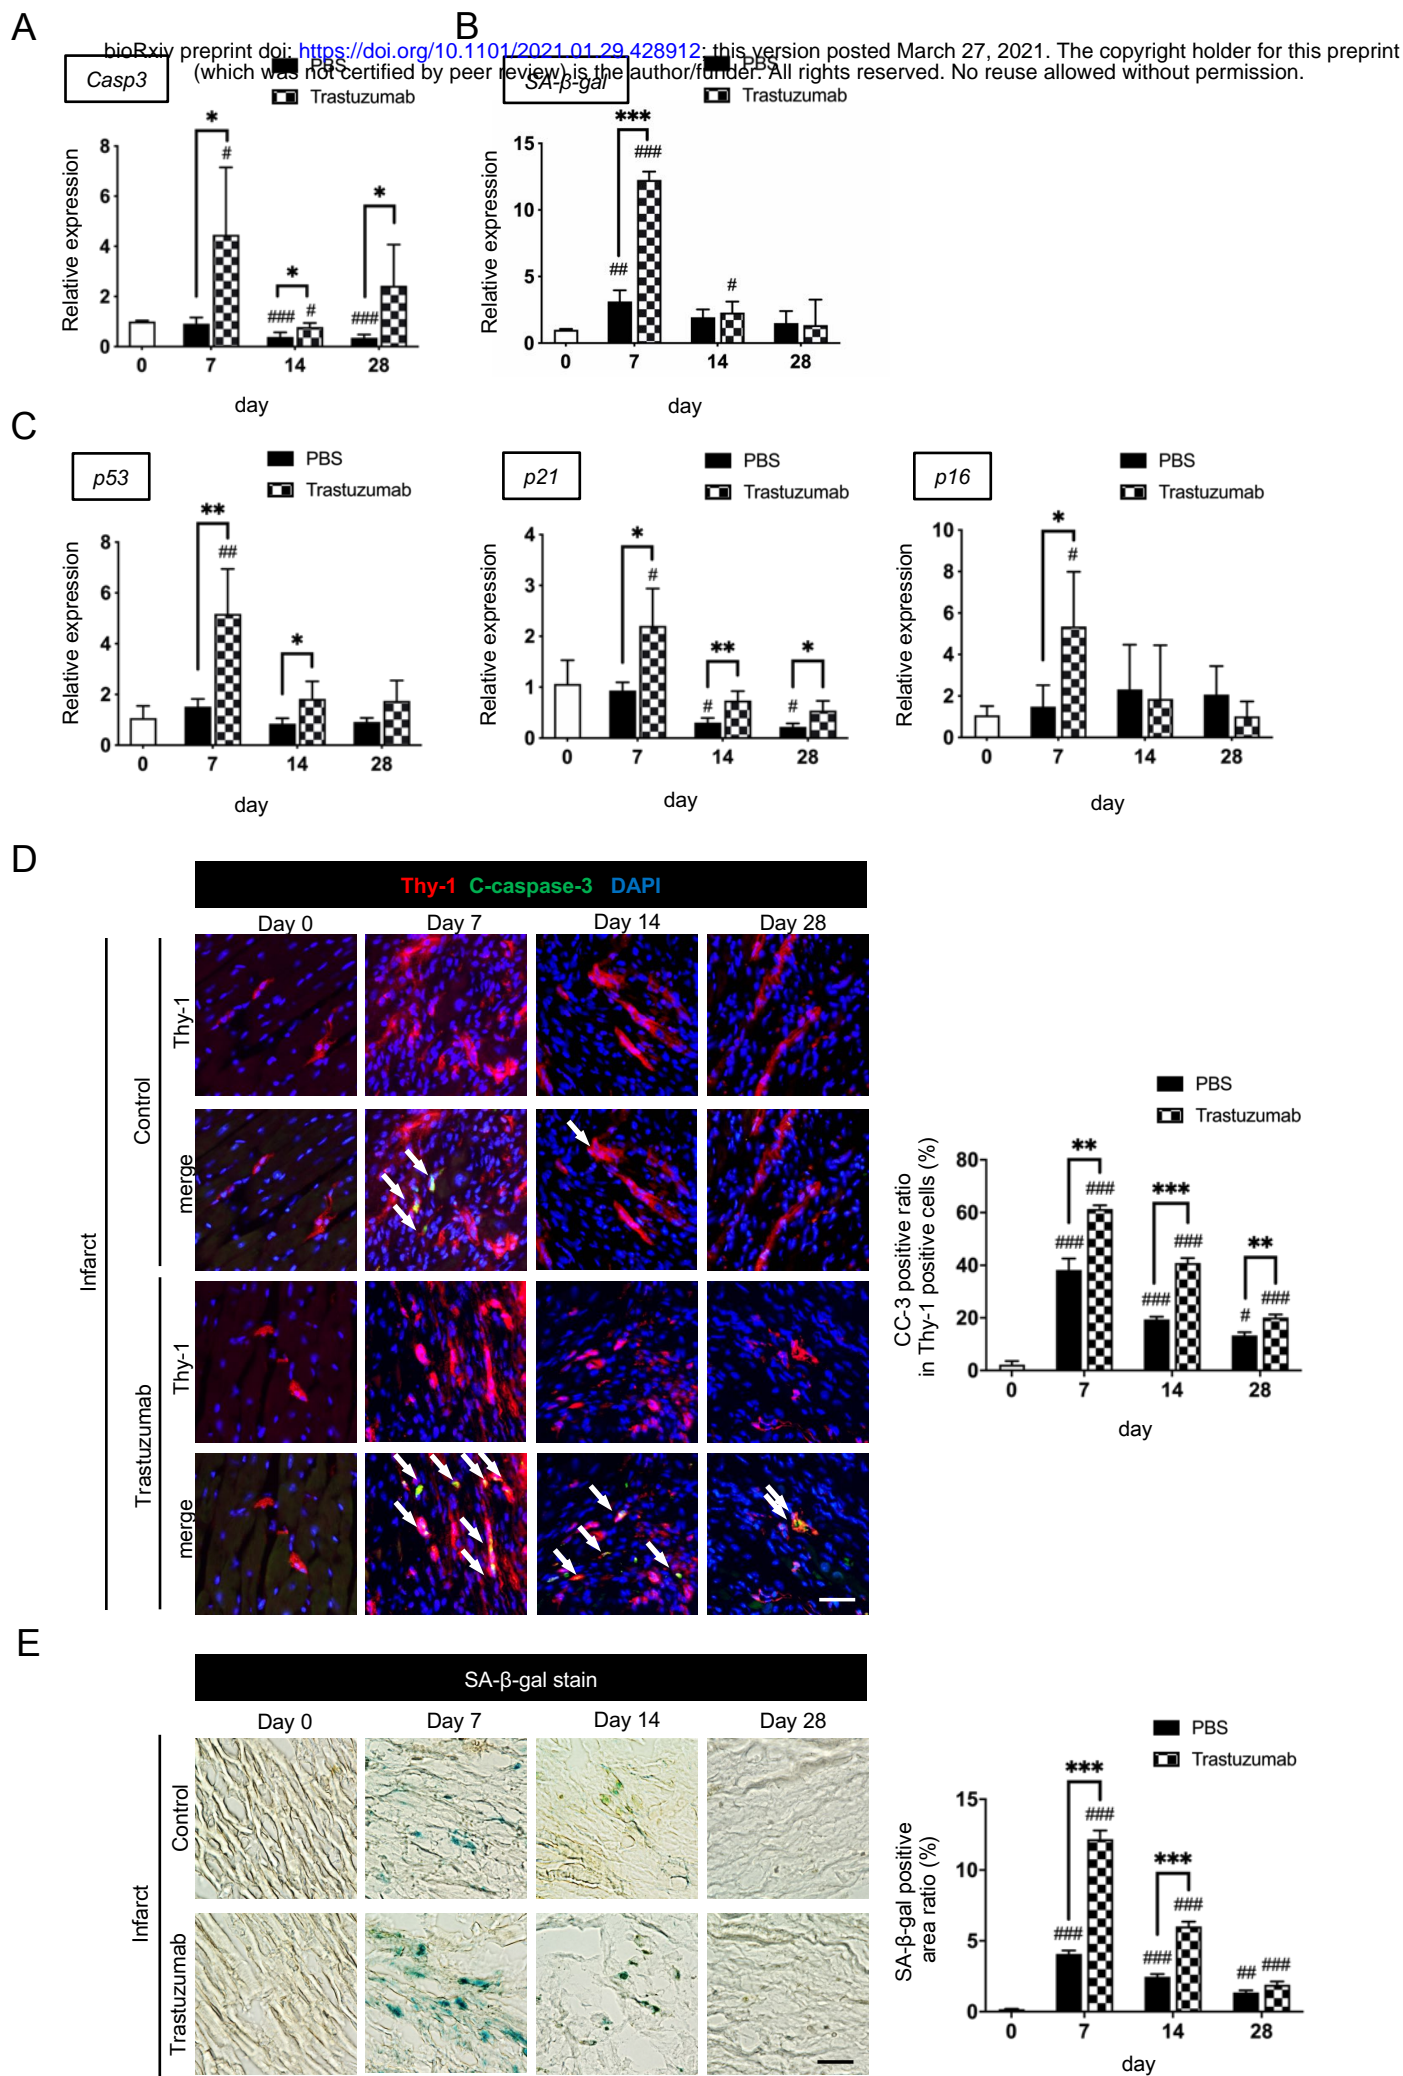

**Figure 8.**

**A**

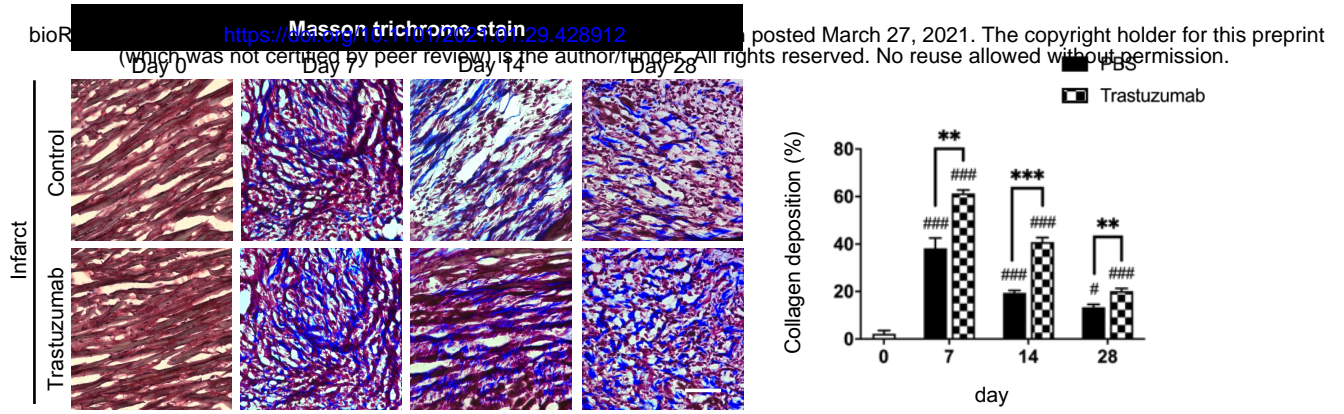

**B**

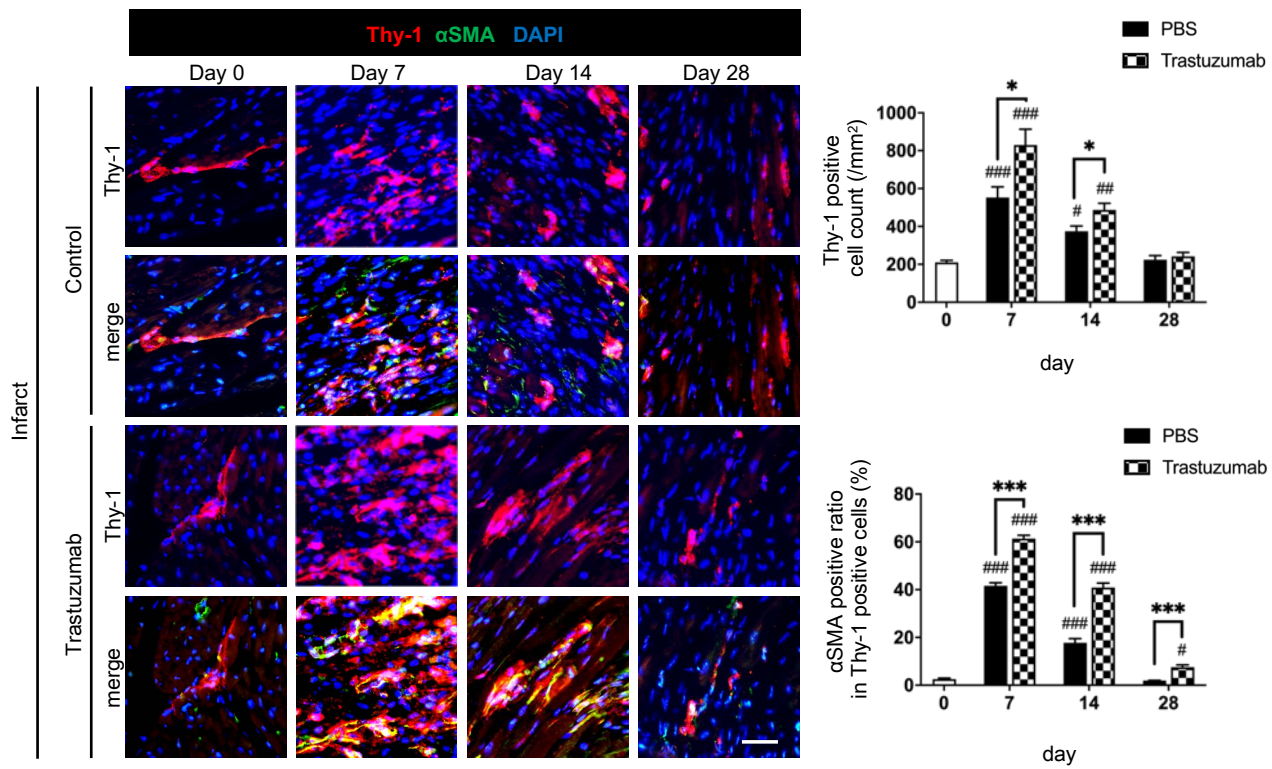

**C**

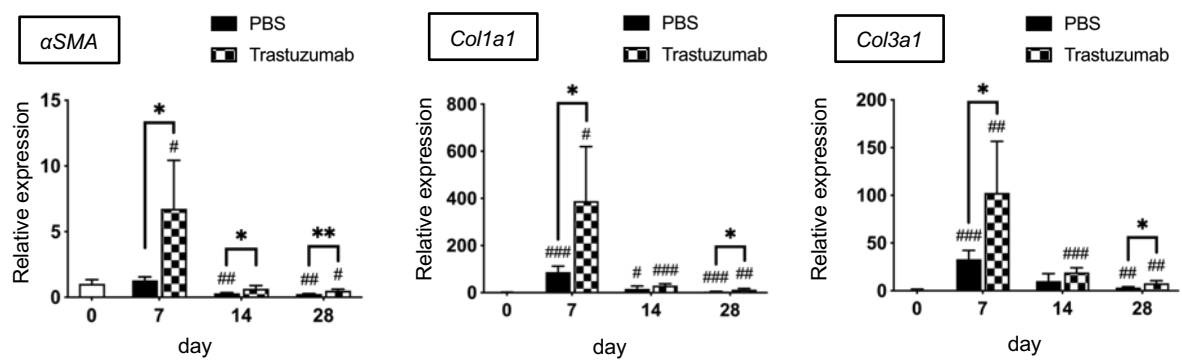

**Figure 9.**

**A** bioRxiv preprint doi: <https://doi.org/10.1101/2021.01.29.428912>; this version posted March 27, 2021. The copyright holder for this preprint (which was not certified by peer review) is the author/funder. All rights reserved. No reuse allowed without permission.

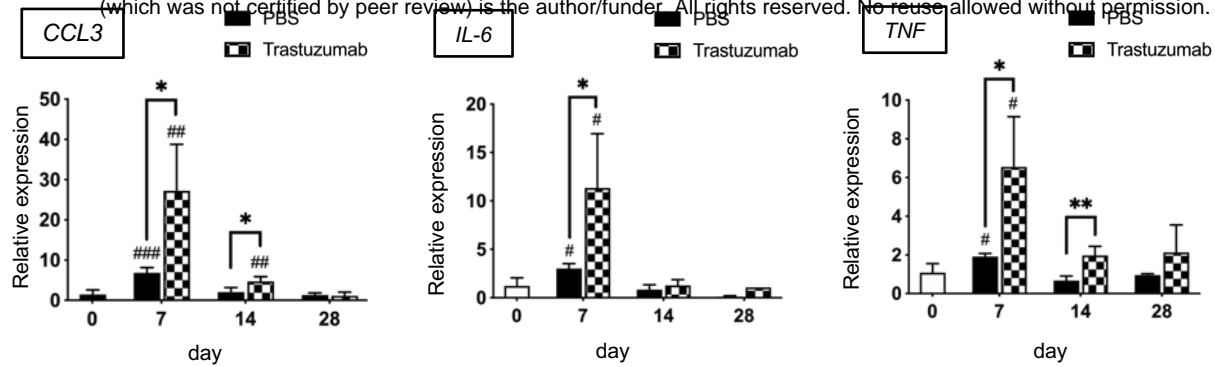

**B**

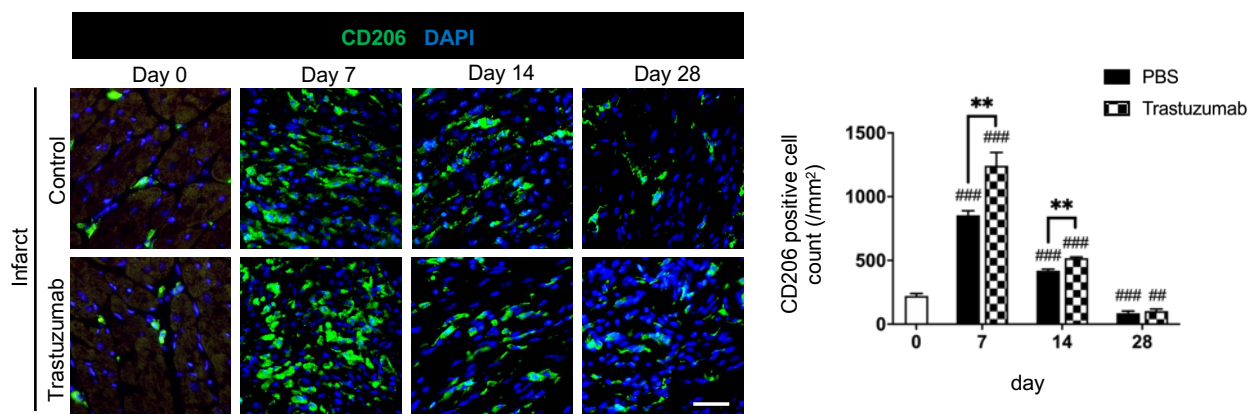

Figure 10.

bioRxiv preprint doi: <https://doi.org/10.1101/2021.01.29.428912>; this version posted March 27, 2021. The copyright holder for this preprint (which was not certified by peer review) is the author/funder. All rights reserved. No reuse allowed without permission.

A

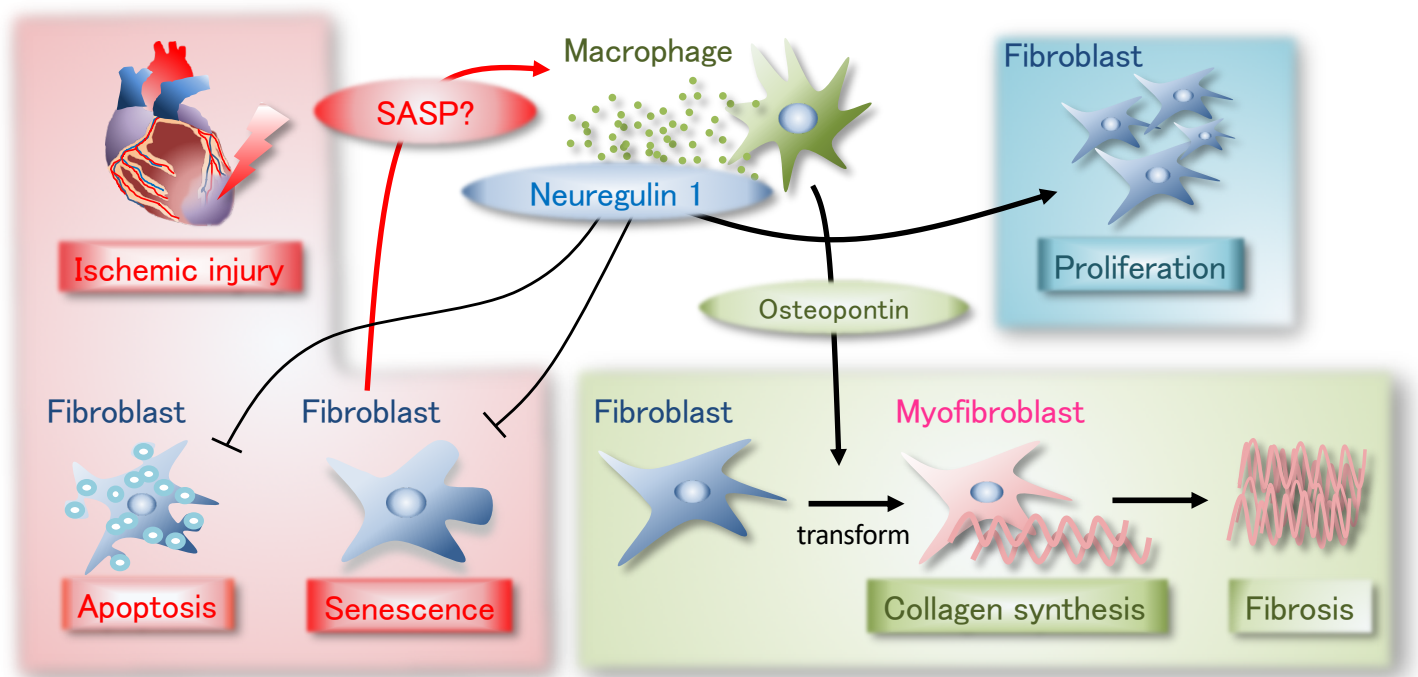

Source: https://www.biorxiv.org/content/10.1101/2021.01.29.428912v3.full.pdf
