1           **Nrg1/ErbB Signaling-Mediated Regulation of Fibrosis After Myocardial Infarction**

2

3

4   Manabu Shiraishi MD, PhD,<sup>1,2</sup> Atsushi Yamaguchi MD, PhD,<sup>1</sup> Ken Suzuki MD, PhD<sup>2</sup>

5

6   <sup>1</sup>Department of Cardiovascular Surgery, Saitama Medical Center, Jichi Medical University,

7   Saitama 330-0834, Japan.

8   <sup>2</sup>William Harvey Research Institute, Barts and The London School of Medicine and Dentistry,

9   Queen Mary University of London, London EC1M 6BQ, United Kingdom.

10

11   **Short title:** Regulatory mechanism of fibrosis after MI

12

13   **Address correspondence to:**

14   Manabu Shiraishi, Department of Cardiovascular Surgery, Saitama Medical Center, Jichi

15   Medical University, Saitama 330-0834, Japan.

16   Tel: +81-48-647-2111; E-mail: manabu@omiya.jichi.ac.jp

17

18   **Word count: 7526**

19

20   **Subject Terms**

21   Cell signaling

22   Fibrosis

23   Ischemia

24   Myocardial Infarction

25 **Abstract**

26 **RATIONALE:** Appropriate fibrotic tissue formation after myocardial infarction (MI) is crucial  
27 to maintenance of the heart's structure. Reparative or M2-like macrophages play a vital role in  
28 post-MI fibrosis by activating cardiac fibroblasts. However, the mechanism by which post-MI  
29 cardiac fibrosis is regulated is not fully understood.

30 **OBJECTIVE:** We investigated the cellular and molecular mechanisms of post-MI fibrotic tissue  
31 formation, especially those related to regulation of cellular senescence and apoptosis.

32 **METHODS AND RESULTS:** *In vivo* and *in vitro* experiments were used to investigate the  
33 molecular and cellular mechanisms through which post-MI fibrosis occurs, with a focus on the  
34 role of M2-like macrophages. Microarray analysis revealed that CD206<sup>+</sup>F4/80<sup>+</sup>CD11b<sup>+</sup> M2-like  
35 macrophages collected from mouse hearts on post-MI day 7 showed increased expression of  
36 neuregulin 1 (Nrg1). Nrg1 receptor epidermal growth factor receptor ErbB was expressed on  
37 cardiac fibroblasts in the infarct area. In cardiac fibroblasts in which hydrogen peroxide-induced  
38 senescence, M2-like macrophage-derived Nrg1 suppressed both senescence and apoptosis of the  
39 fibroblasts, whereas blockade of ErbB function significantly accelerated. M2-like macrophage-  
40 derived Nrg1/ErbB/PI3K/Akt signaling, which was shown to be related to anti-senescence, was  
41 activated in damaged cardiac fibroblasts. Interestingly, systemic blockade of ErbB function in MI  
42 model mice enhanced senescence and apoptosis of cardiac fibroblasts and exacerbated  
43 inflammation. Further, increased accumulation of M2-like macrophages resulted in excessive  
44 progression of fibrosis in post-MI murine hearts. The molecular mechanism underlying  
45 regulation of fibrotic tissue formation in the infarcted myocardium was shown in part to be  
46 attenuation of apoptosis and senescence of cardiac fibroblasts by activation of  
47 Nrg1/ErbB/PI3K/Akt signaling.

48 **CONCLUSIONS:** M2-like macrophage-mediated regulation of Nrg1/ErbB signaling, ~~shown to~~  
49 have a substantial effect on fibrotic tissue formation in the infarcted adult mouse heart, is critical  
50 for suppressing the progression of senescence and apoptosis of cardiac fibroblasts.

51

52 **Key Words:**

53 apoptosis; cardiac fibroblast; fibrosis; macrophage; myocardial infarction; senescence

54

55 **Nonstandard Abbreviations and Acronyms**

56 **Akt** protein kinase B

57  **$\alpha$ SMA** alpha-smooth muscle actin

58 **BMDM** bone marrow-derived macrophage

59 **Cdk** cyclin-dependent kinase

60 **ErbB** epidermal growth factor receptor

61 **GEO** Gene Expression Omnibus

62 **Glb1** galactosidase beta 1

63 **H<sub>2</sub>O<sub>2</sub>** hydrogen peroxide

64 **IL-6** interleukin-6

65 **MDM2** murine double minute 2

66 **MI** myocardial infarction

67 **mTOR** mechanistic target of rapamycin

68 **M2** M2-like macrophage

69 **Nrg1** neuregulin 1

70 **Pdgfa** platelet derived growth factor subunit A

- 71 **PI3K** phosphatidylinositol 3-kinase
- 72 **qRT-PCR** quantitative reverse transcription-polymerase chain reaction
- 73 **SA- $\beta$ -gal** senescence-associated  $\beta$ -galactosidase
- 74 **SASP** senescence-associated secretory phenotype
- 75 **Spp1** secreted phosphoprotein 1
- 76 **Tgfb** transforming growth factor beta
- 77 **Thy1** thymocyte antigen 1
- 78

## 79 INTRODUCTION

80 Myocardial infarction (MI) is a leading cause of mortality and disability worldwide. Heart failure  
81 is common among survivors of acute MI, resulting from the adverse ventricular remodeling that  
82 follows MI.<sup>1,2</sup> Because the regenerative capacity of the human heart does not fully compensate  
83 for the loss of cardiomyocytes that occurs with MI, formation of connective tissue is essential to  
84 maintenance of the integrity and rigidity of the heart. However, the mechanism by which cardiac  
85 fibrosis is regulated after MI is not fully understood.

86 MI results in permanent loss of hundreds of millions of cardiomyocytes.<sup>3</sup> Studies have shown  
87 that in the infarct area even non-cardiomyocytes, including fibroblasts, disappear in large  
88 quantities by apoptosis and that cellular senescence-associated defects occur in cardiac repair  
89 after MI.<sup>4,5</sup> Apoptosis plays an important role in the disappearance of infiltrated immune cells  
90 and cardiac interstitial cells after MI.<sup>5</sup> Because senescence and apoptosis of both cardiomyocytes  
91 and fibroblasts are deeply involved in the pathophysiology of adverse left ventricular remodeling  
92 and myocardial rupture after MI,<sup>6</sup> understanding the molecular mechanisms by which senescence  
93 and apoptosis are regulated during the post-MI tissue repair process is important. Cellular  
94 senescence and apoptosis are processes of growth arrest that occur with age and in response to  
95 cellular stress and damage, and they limit proliferation of cells.<sup>7,8</sup> Senescent cells possess a  
96 complex phenotype and are characterized by cell cycle arrest mediated via p16 and p53/p21  
97 pathways, with some ultimately manifesting a unique secretory phenotype known as the  
98 senescence-associated secretory phenotype (SASP).<sup>9</sup> Cell cycle arrest plays a central role in the  
99 senescent phenotype of adult cardiomyocytes, and induction of cell cycle reentry of adult  
100 cardiomyocytes promotes post-MI cardiac repair.<sup>10</sup> Administration of anti-apoptotic substances  
101 to rats after MI has been shown to suppress cardiomyocyte apoptosis, which in turn decreases

102 infarct size and ameliorates the cardiac dysfunction that typically follows MI.<sup>11</sup> Even non-  
103 cardiomyocytes in the infarct area, including fibroblasts, undergo apoptosis.<sup>4,5</sup> Therefore,  
104 senescence and/or apoptosis of cardiac fibroblasts may be involved in the tissue repair process  
105 that follows MI. Senescent cardiac fibroblasts, in which expression of the major senescence  
106 regulator p53 is significantly upregulated, have been shown to accumulate markedly in the  
107 mouse heart after MI, with the upregulation of p53 shown to limit cardiac collagen production,  
108 and conversely, the inhibition of p53 shown to increase reparative fibrosis.<sup>1</sup> However, the  
109 methods used in the aforementioned studies are limited in their ability to identify the particular  
110 subset of immune cells involved in the post-MI fibrotic process as well as the inherent cellular  
111 and molecular mechanisms by which fibroblast senescence and collagen production are  
112 regulated. Whereas fibrosis after MI is crucial to maintaining myocardial structure, excessive  
113 fibrosis leads to eventual heart failure. Therefore, achieving equilibrium between profibrotic and  
114 anti-fibrotic environments is important for a good regenerative outcome. For an understanding of  
115 the fibrosis-based tissue repair process, intercellular communication between senescent and  
116 apoptotic fibroblasts and surrounding immune cells must be clarified.

117       Investigators have shown macrophages to be essential for regeneration of the neonatal mouse  
118 heart,<sup>12</sup> and we have shown that reparative or M2-like macrophages play a pivotal role in the  
119 formation of fibrous tissue following MI by promoting proliferation and activation of cardiac  
120 fibroblasts.<sup>13</sup> We hypothesized that M2-like macrophages play a vital role in attenuating  
121 apoptosis and senescence of cardiac fibroblasts, both of which are profoundly involved in the  
122 regulation of fibrotic processes after MI, and we investigated the molecular mechanism by which  
123 this particular subset of immune cells effectuates this regulation.

124 Neuregulin 1 (*Nrg1*) is one of the neuregulin genes (*Nrg1–Nrg4*) belonging to the family of  
125 epidermal growth factor genes,<sup>14,15</sup> and Nrg1/epidermal growth factor receptor (ErbB) signaling  
126 systems play essential roles in the protection and proliferation of cardiomyocytes in response to  
127 injury.<sup>16-19</sup> Although association between Nrg1 and protection of cardiomyocytes has been  
128 studied over several decades,<sup>16-19</sup> the exact mechanism through which Nrg1 protects cardiac  
129 fibroblasts and the mechanism through which Nrg1 participates in post-MI regeneration have not  
130 been elucidated. A recent study showed that Nrg1 enhances proliferation and viability of normal  
131 human ventricular cardiac fibroblasts, with the Nrg1 activity linked to Nrg1/ErbB signaling.<sup>20</sup>  
132 Results of a study in a mouse model of myocardial hypertrophy indicated that Nrg1 has an anti-  
133 fibrotic effect in the heart, generated by anti-inflammatory Nrg1/ErbB signaling in  
134 macrophages.<sup>21</sup> Furthermore, Nrg1-loaded poly-microparticles were used in a later study to  
135 induce macrophage polarization toward an anti-inflammatory phenotype, which prevented their  
136 transition toward the inflammatory phenotype and enhanced cardiac repair after MI.<sup>22</sup> However,  
137 whether M2-like macrophages function to ameliorate senescence and apoptosis of cardiac  
138 fibroblasts through Nrg1/ErbB signaling activity *in vivo* under post-MI conditions is unknown.  
139 Although the contribution of Nrg1/ErbB signaling in macrophages and macrophage polarization  
140 toward an anti-inflammatory phenotype to cardiac tissue repair was investigated in these studies,  
141 the significance of Nrg1/ErbB signaling activity in cardiac fibroblasts with respect to the anti-  
142 fibrotic effect of Nrg1 has not been clarified. We established what we believe to be an  
143 appropriate *in vitro* model for delineation of the precise roles of M2-like macrophage-derived  
144 Nrg1 after MI in anti-senescence, anti-apoptosis, and the fibrotic phenotype of fibroblasts.  
145 Moreover, we used this model and an *in vivo* model to investigate the molecular and cellular  
146 mechanisms by which post-MI fibrosis occurs, with a focus on the role of M2-like macrophages.

147 We aimed to shed light on the pathophysiology of fibrosis after MI and provide information that  
148 will contribute to ultimate development of new therapeutic strategies that exploit Nrg1-driven  
149 senescence and apoptosis of cardiac fibroblasts.

150

## 151 **METHODS**

### 152 **Data Availability**

153 Microarray data: Gene Expression Omnibus GSE69879

154 (<https://www.ncbi.nlm.nih.gov/geo/query/acc.cgi?acc=GSE69879>)

155

156 Please see the Supplemental Materials for Methods and Major Resources.

157

## 158 **RESULTS**

### 159 **Cardiac Fibroblasts Undergo Apoptosis and Senescence After MI**

160 We investigated cellular senescence and apoptosis in a mouse MI model, which was established  
161 by means of coronary artery ligation. Obvious fibrotic tissue formation and increased myocardial  
162 expression of fibrosis-associated genes (*αSMA* [alpha-smooth muscle actin gene], *Coll1a1*, and  
163 *Col3a1*) were observed in the infarct area as soon as post-MI day 7 (Figure IA–B in the Data  
164 Supplement). These changes were associated with an increase in the number of thymocyte  
165 antigen 1 (Thy1)<sup>+</sup> fibroblasts and Thy1<sup>+</sup>αSMA<sup>+</sup> myofibroblasts in the infarct area (Figure IC–D  
166 in the Data Supplement), which peaked on post-MI day 7. Interestingly, approximately 40% of  
167 Thy1<sup>+</sup> fibroblasts in the infarct area were positive for cleaved caspase 3 on post-MI day 7, and  
168 approximately 15% were positive for cleaved caspase 3 on post-MI day 28, indicative of robust  
169 apoptosis of cardiac fibroblasts (Figure 1A). Senescence-associated β-galactosidase (SA-β-gal)-



170 positive cells were also found in the infarct area. Numerous SA- $\beta$ -gal-positive cells were spindle-  
171 shaped and had many cytoplasmic processes and thus appeared to be fibroblasts (Figure 1B).  
172 Additionally, myocardial expression of senescence-associated genes (*p16*, *p2*, and *Glb1* [beta 1  
173 galactosidase gene])<sup>1,7,8,23,24</sup> and inflammation-associated genes (*CCL3*, *IL-6*, and *TNF*) was  
174 upregulated in the infarct area in comparison to that in the non-infarct (remote) area (Figure 1C  
175 and IE in the Data Supplement). Importantly, myocardial expression of reparative gene *Nrg1* was  
176 upregulated in the infarct area, peaking on post-MI day 7 (Figure 1D). Immunohistochemistry  
177 (IHC) showed that most Thy1<sup>+</sup> cardiac fibroblasts that had accumulated in both the infarct and  
178 remote areas expressed ErbB2 and ErbB4, which are *Nrg1* coreceptors<sup>19,25,26</sup> (Figure 1E). Taken  
179 together, these results indicate that apoptosis and senescence of cardiac fibroblasts occur during  
180 fibrotic tissue formation in the post-MI heart and that cardiac fibroblasts express 2 *Nrg1*  
181 receptors, ErbB2 and ErbB4, in response to ischemic injury.

182

### 183 **M2-Like Macrophages Accumulate in the Infarct Area and Express *Nrg1***

184 IHC showed that CD206<sup>+</sup> M2-like macrophages had accumulated in the infarct area, with peak  
185 accumulation observed on post-MI day 7 (Figure 2A). Interestingly, this change in M2-like  
186 macrophages corresponded to the change that occurred in cardiac fibroblasts after MI (Figure 1C  
187 in the Data Supplement). We further confirmed that CD206<sup>+</sup> cells were also positive for F4/80 in  
188 both normal and infarcted hearts (Figure 2B). Microarray analysis showed that the molecular  
189 signature of CD206<sup>+</sup>F4/80<sup>+</sup>CD11b<sup>+</sup> M2-like macrophages collected from infarcted hearts on  
190 post-MI day 7 differed from that of M2-like macrophages collected from normal hearts (Figure  
191 IIA in the Data Supplement). A range of anti-inflammatory and reparative genes was upregulated  
192 in M2-like macrophages in comparison to expression of the same genes in M2-like macrophages

193 obtained from normal hearts (Figure IIB in the Data Supplement; the full dataset is available in  
194 the Gene Expression Omnibus [GEO] database; GSE69879). Importantly, gene ontology analysis  
195 showed association between M2-like macrophages obtained from infarcted hearts and regulation  
196 of apoptosis and cell death (Figure IIC in the Data Supplement). By searching HomoloGene  
197 (<https://www.ncbi.nlm.nih.gov/homologene>) for genes related to proliferation and viability, we  
198 focused on the increased expression level of *Nrg1* in M2-like macrophages obtained from  
199 infarcted hearts (Figure 2C), which was confirmed by quantitative reverse transcription-  
200 polymerase chain reaction (qRT-PCR) and IHC (Figure 2D–E). The data indicate that M2-like  
201 macrophages are a source of *Nrg1* after MI.

202

### 203 **Bone Marrow-Derived Macrophages Attenuate Hydrogen Peroxide (H<sub>2</sub>O<sub>2</sub>)-Induced** 204 **Apoptosis and Senescence of Cardiac Fibroblasts Via *Nrg1* Secretion**

205 We investigated the role of macrophages in regulating senescence and apoptosis of fibroblasts in  
206 an *in vitro* coculture model using a Boyden Chamber system in which cells can be independently  
207 cultured or genetically analyzed without being mixed together<sup>13,27</sup> (Figure IIIA in the Data  
208 Supplement). Hydrogen peroxide (H<sub>2</sub>O<sub>2</sub>) was used to induce senescence of fibroblasts (Figure  
209 IIIB–C in the Data Supplement). Bone marrow-derived macrophages (BMDMs) that were  
210 cocultured with the senescent fibroblasts were of an M2-like macrophage phenotype (Figure  
211 IVA–B in the Data Supplement). As observed *in vivo* after MI (Figure 2C–E and Figure 1E),  
212 increased expression of *Nrg1* was seen in BMDMs (Figure VA in the Data Supplement) and  
213 increased expression of *ErbB2* and *ErbB4* was seen in cardiac fibroblasts (Figure VB–C in the  
214 Data Supplement) 48 hours after the start of coculture. Phase-contrast microscopy (Figure 3A)  
215 showed that fibroblasts treated with H<sub>2</sub>O<sub>2</sub> had an enlarged, flattened, senescent morphology, but

216 after coculture with BMDMs the fibroblasts took on a healthy, spindle-shaped form. Importantly,  
217 addition of anti-ErbB antibody (Ab), which is a competitive inhibitor of Nrg1, changed the gross  
218 morphology of fibroblasts such that they resembled the fibroblasts treated with H<sub>2</sub>O<sub>2</sub>. Treatment  
219 with recombinant Nrg1 restored the senescent fibroblasts to a healthy spindle-shaped form.  
220 Approximately 20% of fibroblasts treated with H<sub>2</sub>O<sub>2</sub> were found to be positive for senescence-  
221 associated  $\beta$ -galactosidase (SA- $\beta$ -gal) (Figure 3B). This change was significantly attenuated by  
222 coculture with BMDMs, whereas addition of anti-ErbB Ab eliminated the anti-senescence effect  
223 of the BMDMs. Furthermore, treatment with recombinant Nrg1 suppressed senescence.  
224 Expression of apoptosis-related cleaved caspase 3 (Figure 3C) was similar to that of SA- $\beta$ -gal.  
225 Conversely, expression of proliferation-related Ki-67 was significantly attenuated by H<sub>2</sub>O<sub>2</sub>  
226 treatment and restored by co-culture with BMDMs. Effects of the BMDMs were diminished by  
227 anti-ErbB Ab, whereas recombinant Nrg1 improved H<sub>2</sub>O<sub>2</sub>-induced functional deterioration.  
228 Together, these results show that Nrg1 derived from BMDMs reduces both apoptosis and  
229 senescence of cultured fibroblasts and promotes their proliferation.

230

### 231 **BMDMs Promote Activation of Fibroblasts and Collagen Synthesis**

232 Immunocytological staining showed that, although treatment with H<sub>2</sub>O<sub>2</sub> alone did not affect  
233 conversion of cardiac fibroblasts into  $\alpha$ SMA<sup>+</sup> myofibroblasts, the phenotypic change progressed  
234 in coculture of cardiac fibroblasts with BMDMs. Furthermore, addition of anti-ErbB Ab  
235 enhanced this BMDM-induced activation of fibroblasts. Addition of recombinant Nrg1 did not  
236 affect conversion of cardiac fibroblasts (Figure 4A). Changes in synthesis of types I and III  
237 collagen in fibroblasts in response to H<sub>2</sub>O<sub>2</sub>, BMDMs, and recombinant Nrg1 were similar to  
238 changes in  $\alpha$ SMA expression (Figure 4B–C). These results suggest that BMDMs, which are of

239 an M2-like phenotype (Figure IVA–B in the Data Supplement), induce activation of fibroblasts  
240 for conversion to myofibroblasts and progression of collagen synthesis. The important take-away  
241 point to be drawn from these results is that that cellular senescence and apoptosis alone do not  
242 induce activation of fibroblasts for conversion to myofibroblasts and progression of collagen  
243 synthesis; the presence of BMDMs is required. Osteopontin (secreted phosphoprotein 1 [SPP1])  
244 is a major mediator of M2-like macrophage-induced cardiac fibroblast activation.<sup>13</sup> *Spp1*  
245 expression was found to be increased in BMDMs in response to H<sub>2</sub>O<sub>2</sub> (Figure VIA in the Data  
246 Supplement). Conversely, other profibrotic factors, including transforming growth factor beta  
247 and platelet derived growth factor subunit A,<sup>28,29</sup> were found not to be upregulated in M2-like  
248 macrophages (Figure VIB in the Data Supplement).

249

### 250 **Phosphatidylinositol 3-Kinase/Protein Kinase B Signaling is Associated with BMDM-** 251 **Attenuated Apoptosis and Senescence of Cardiac Fibroblasts Through Nrg1**

252 We next investigated the molecular mechanism underlying attenuation of apoptosis and  
253 senescence of cardiac fibroblasts by BMDM-derived Nrg1 in an *in vitro* setting. The  
254 phosphatidylinositol 3-kinase (PI3K)/protein kinase B (Akt) signaling pathway is downstream of  
255 the ErbB pathway. Western blot analysis showed that H<sub>2</sub>O<sub>2</sub> treatment suppressed PI3K/Akt  
256 activation in fibroblasts (Figure 5A). Coculture with BMDMs and treatment with recombinant  
257 Nrg1 upregulated the signaling activity, whereas addition of anti-ErbB Ab suppressed the  
258 signaling activity. To determine the possible relation between senescence-associated p21/p16 and  
259 Nrg1/ErbB/PI3K/Akt signaling pathways, we examined mRNA expression levels of senescence-  
260 associated genes (*p21*, *p16*, and *Glb1*) (Figure 5B), cell cycle-associated genes (cyclin-dependent  
261 kinase 4 [*Cdk4*], cyclin-dependent kinase 6 [*Cdk6*], cyclin-dependent kinase 2 [*Cdk2*], and *Ki-*

262 67) (Figure 5C), a p53 suppressor gene (murine double minute 2 [*MDM2*]) (Figure 5D), a cell  
263 survival-associated gene (mechanistic target of rapamycin [*mTOR*]) (Figure 5E), and an SASP-  
264 associated gene (interleukin-6 [*IL-6*]) (Figure 5F). Expression levels of senescence-associated  
265 genes (*p16* and *p21*) and the SASP-associated gene (*IL-6*) were significantly higher and  
266 expression levels of cell cycle-associated genes (*Cdk4*, *Cdk6*, *Cdk2*, and *Ki-67*) were markedly  
267 lower in fibroblasts treated with H<sub>2</sub>O<sub>2</sub> than in non-treated (control) fibroblasts. Importantly, these  
268 changes in expression were reversed by coculture with BMDMs. Anti-ErbB Ab exacerbated  
269 senescence and cell cycle arrest, whereas recombinant Nrg1 suppressed senescence and  
270 enhanced proliferation. BMDMs enhanced or restored expression of p53 suppressor-related  
271 *MDM2* and cell survival-related *mTOR*. These results indicate that the PI3K/Akt signaling  
272 pathway activation in cardiac fibroblasts operates downstream of the BMDM-derived Nrg1/ErbB  
273 system and has a suppressive effect on cell cycle arrest and senescence. This signaling activity is  
274 also likely to increase cell proliferation and survival (Figure 5G).

275

### 276 **In Vivo Inhibition of Nrg1 Signaling Exacerbates Fibrosis**

277 We used trastuzumab to clarify the role of Nrg1 in suppressing post-MI senescence and apoptosis  
278 of cardiac fibroblasts *in vivo*. Trastuzumab is an anti-ErbB type 2 (ErbB2) monoclonal Ab that  
279 binds to the extracellular juxtamembrane domain of ErbB2.<sup>30,31</sup> On the basis of the *in vitro*  
280 coculture model, we hypothesized that trastuzumab administration would eliminate the anti-  
281 apoptotic and anti-senescence effects of Nrg1 and therefore allow senescence of cardiac  
282 fibroblasts to proceed, which would result in excessive fibrosis in the infarcted myocardium.  
283 Intraperitoneal trastuzumab injections did not affect mRNA expression levels of genes associated  
284 with senescence, the SASP, or activation of fibroblasts to myofibroblasts in the normal mouse

285 heart (Figure VIIA–C in the Data Supplement). We induced MI in mice surgically and then  
286 injected either trastuzumab or vehicle intraperitoneally (Figure VIIIA in the Data Supplement).  
287 Trastuzumab did not affect post-MI mortality or body weight (Figure VIIIB–C in the Data  
288 Supplement). Gene expression profiles in cardiac fibroblasts resident in infarcted myocardium  
289 suggested that senescence was augmented by trastuzumab administration in the infarct area  
290 (Figure 6A). The changes in gene expression corresponded to increases in the number of  
291 senescent cardiac fibroblasts and cardiac cells in the infarct area (Figure 6B–C). Additionally,  
292 trastuzumab administration increased the proportion of fibrotic tissue in the infarct area (Figure  
293 7A). In fact, the numbers of Thy-1<sup>+</sup> fibroblasts and  $\alpha$ SMA<sup>+</sup>Thy1<sup>+</sup> myofibroblasts were increased  
294 in association with upregulation of  *$\alpha$ SMA*, *Colla1*, and *Col3a1* in the infarct area (Figure 7B–C).  
295 Considering these *in vitro* experimental results, increased inflammation (Figure 8A) and boosted  
296 accumulation of M2-like macrophages (Figure 8B) in this area by ErbB2 blockade may explain  
297 the increased fibroblast activation and augmented fibrosis. Interestingly, trastuzumab  
298 administration induced expression of apoptosis- and senescence-associated genes even in the  
299 remote area (Figure IXA–C in the Data Supplement) where there was little or no direct ischemic  
300 damage after the MI. This corresponded to the increased inflammation (Figure XA in the Data  
301 Supplement) and the augmented accumulation of both M2-like macrophages and cardiac  
302 fibroblasts in the remote myocardium (Figure XB and Figure XIA in the Data Supplement).  
303 Conversion of fibroblasts to myofibroblasts and expression of fibrosis-associated genes were  
304 also induced (Figure XI–B in the Data Supplement). Consequently, acute exacerbation of fibrosis  
305 occurred even in the remote area (Figure XII in the Data Supplement). Thus, administration of  
306 trastuzumab augmented apoptosis and senescence of cardiac fibroblasts following MI, resulting  
307 in excessive fibrosis, even in the remote non-infarct area.

308

## 309 **DISCUSSION**

310 Despite the clinical importance of cellular and molecular processes underlying post-MI fibrosis,  
311 the processes are not well understood. To precisely determine the roles of cardiac M2-like  
312 macrophages in apoptosis and senescence of fibroblasts, we established an *in vitro* model in  
313 which senescent cardiac fibroblasts<sup>32</sup> were cocultured with BMDMs. This *in vitro* coculture  
314 model reflects the *in vivo* post-MI conditions because, under pathological conditions, senescent  
315 cells attract macrophages.<sup>33</sup> Expression of both *Cdk4/6* and *Cdk2* should be stable or increased in  
316 senescent cells, but expression levels were decreased in the cardiac fibroblasts in which  
317 senescence was induced by H<sub>2</sub>O<sub>2</sub>. The mechanism is expected to involve increased expression of  
318 *p16* and *p21*, which downregulate *Cdk4/6* and *Cdk2* expression, respectively.<sup>8,34,35</sup> Conversely,  
319 the addition of BMDMs decreased *p16* and *p21* expression and promoted the cell cycle (as  
320 evidenced by increased expression of *Cdk 4/6* and *Cdk2*). The hypertrophic response to Nrg1 is  
321 mainly dependent on Ras, whereas the anti-apoptotic and cell proliferation effects are likely  
322 dependent on Akt.<sup>36,37</sup> Therefore, Nrg1 may attenuate expression of senescence-associated genes  
323 *p21*, *p16*, and *Glb1* through PI3K/Akt pathways (Figure 5G). We observed a transient increase in  
324 *p21*, *p16*, and *Glb1* expression in the infarcted myocardium and in cultured fibroblasts. Stress-  
325 induced *p53* expression increases *p21* expression in response to DNA damage and induces  
326 reversible proliferative arrest that provides time for DNA repair and facilitates survival of  
327 cells.<sup>38,39</sup> *p21*, which binds to and inhibits CDK2, is important for initiation of senescence in  
328 some settings, but *p21* expression does not persist in senescent cells.<sup>8,34,40,41</sup> Increased *p16*  
329 expression is found in infarcted tissue. Irreversible proliferative arrest can be induced by *p16*,  
330 which inhibits CDK4 and CDK6.<sup>8,35</sup> Therefore, the change in expression levels of these genes

331 (i.e., *p21* and *p16*) in both the *in vivo* and *in vitro* experiments suggests that Nrg1 is a crucial  
332 factor that controls reversible and irreversible senescence of cardiac cells after MI. Another  
333 possible mechanism for the temporal change in *p21* and *p16* expression in the *in vivo* experiment  
334 is as follows: There could be multiple types of *p21*- and *p16*-positive cells. Therefore, whereas  
335 some *p21*- and *p16*-positive cell populations disappear, other *p21*- and *p16*-positive cells may  
336 remain. We showed a possible mechanism linking M2-like macrophages and cardiac fibroblasts,  
337 which contributes to various processes that are critical to many aspects of cellular function,  
338 including cell growth and survival.<sup>42</sup> Together, results of our *in vivo* and *in vitro* experiments  
339 suggest that macrophage-derived Nrg1 suppresses senescence and promotes proliferation of  
340 cardiac fibroblasts after myocardial injury by activating the ErbB/PI3K/Akt signaling pathway.

341 ErbB is expressed not only on the surface of fibroblasts but also on the surface of  
342 macrophages, and myeloid-specific *ErbB* deletion exacerbates myocardial fibrosis.<sup>21</sup>  
343 Furthermore, Nrg1-induced macrophage polarization from an inflammatory phenotype toward an  
344 anti-inflammatory phenotype enhances cardiac repair after MI.<sup>22</sup> Therefore, the question was  
345 raised whether ErbB signaling in BMDMs was simultaneously affected when anti-ErbB Ab was  
346 added to the culture medium in our coculture experiments. The exacerbated phenotypic changes  
347 characterizing senescence and apoptosis of fibroblasts might not be due to inhibition of  
348 Nrg1/ErbB signaling in the fibroblasts. However, we showed that the phenotypic changes and  
349 expression of genes denoting the senescence and apoptosis of H<sub>2</sub>O<sub>2</sub>-treated cells, with the  
350 Nrg1/ErbB signaling-induced activation of BMDMs having been excluded, were similar to those  
351 in the H<sub>2</sub>O<sub>2</sub>+BMDM+anti-ErbB Ab treated cells (Figure 3A–C and Figure 5B–C). Therefore, our  
352 data suggest that Nrg1/ErbB signaling activity has a greater anti-senescence and anti-apoptotic  
353 effect in fibroblasts than does the signaling activity related to macrophage polarization.



354 Nrg1 is a cytokine that belongs to a family of proteins structurally related to epidermal growth  
355 factor, and it plays essential roles in protection and proliferation of cardiomyocytes in response  
356 to injury.<sup>16-19</sup> Injecting Nrg1 into adult mice induces cardiomyocyte cell cycle activity and  
357 promotes myocardial regeneration, leading to improved function after MI.<sup>16,18</sup> Nrg1 also  
358 significantly decreases apoptosis of adult cardiomyocytes under hypoxia-reoxygenation  
359 conditions.<sup>17</sup> However, its function in cardiac fibroblasts in this context has not been well  
360 studied. We present new *in vivo* and *in vitro* evidence suggesting that M2-like macrophages play  
361 a vital role in attenuating senescence and apoptosis of fibroblasts through Nrg1/ErbB/PI3K/Akt  
362 signaling pathways. This inherent reparative function allows senescent cardiac fibroblasts to  
363 recover to a certain degree. Conversely, incomplete rescue of fibroblasts from senescence might  
364 lead to undesired fibrosis.

365 Previous studies have shown that trastuzumab efficiently stops or slows the growth of ErbB2<sup>+</sup>  
366 cells *in vitro* and inhibits the ability of cells to repair damaged DNA.<sup>30,31</sup> As inflammation  
367 worsens after MI, M2-like macrophages from bone marrow accumulate at the site of damaged  
368 tissue.<sup>43</sup> Our study showed that progression of senescence and apoptosis in cardiac fibroblasts  
369 and exacerbation of inflammation induced by trastuzumab increased the accumulation of M2-  
370 like macrophages, which in turn promoted activation of fibroblasts and excessive fibrosis. These  
371 results are consistent with our previous report indicating that interleukin 4-mediated M2-like  
372 macrophage activation induces conversion of fibroblasts into myofibroblasts for progression of  
373 fibrosis.<sup>13</sup> Although we analyzed mRNA expression levels in sections of heart tissue and not in  
374 single cells, increased expression levels of senescence-associated genes in the trastuzumab-  
375 treated samples were considered to reflect progression of senescence. These results corresponded  
376 to results obtained *in vitro* with use of anti-ErbB Ab. We administered trastuzumab systemically,

377 which has unclarified cardiotoxicity, to explore ErbB signaling in cardiac fibroblasts. Because  
378 cardiotoxicity of trastuzumab is non-specific, our study was limited by the fact that the ErbB  
379 receptor block achieved with anti-ErbB Ab is not specific to cardiac fibroblasts. Moreover, M2-  
380 like macrophages are not the only source of Nrg1 after MI. Apart from the M2-like macrophages  
381 we studied, endothelial cells have been identified as a potential cell type for neuregulin  
382 production and are responsible for the healing response after myocardial injury.<sup>16-19</sup> Therefore,  
383 further mechanistic studies are needed to clarify the signaling pathways downstream of these  
384 factors and the clear role of Nrg1, i.e., studies that incorporate cardiac fibroblast-specific  
385 conditional *ErbB2/ErbB4*-knockout mice and macrophage-specific conditional *Nrg1*-knockout  
386 mice.

387 Interestingly, senescence and SASP-associated gene expression peaked a little later in the  
388 remote area than in the infarct area. One possible pathological mechanism of the remote non-  
389 infarct area is assumed to be indirect damage via SASP rather than direct cytotoxicity due to  
390 ischemia. Senescent cells autonomously induce senescence-like gene expression in surrounding  
391 non-senescent cells through the SASP.<sup>44</sup> Increased release of SASP-associated substances in the  
392 infarct area might not simply induce senescence and apoptosis of cells in the infarct area; it  
393 might also have a harmful influence on non-senescent cells in the remote non-infarct area.

394 Although this study focused on Nrg1-induced anti-apoptosis and anti-senescence of cardiac  
395 fibroblasts, M2-like macrophages are likely to mediate supplementary benefits for cardiac repair  
396 after MI. These benefits may include reduced inflammation, activation of fibroblasts, and  
397 neovascularization, as shown in our previous study.<sup>13</sup> To develop potential therapies mediated by  
398 M2-like macrophages, studies are needed to determine how the gene that encodes Nrg1 is

399 switched on by MI and to identify other molecules that regulate apoptosis, senescence, and  
400 proliferation of cardiac fibroblasts.

401 In conclusion, our data provide evidence that the Nrg1/ErbB/PI3K/Akt signaling system  
402 regulates senescence and apoptosis of cardiac fibroblasts in the infarcted adult murine heart. This  
403 process might play a vital role in repair of the infarcted myocardium by regulating collagen  
404 synthesis. Therefore, this tissue repair mechanism controls the degree of rigidity and contraction  
405 of the infarcted heart, thereby determining the prognosis of MI. Better understanding of the  
406 molecular mechanism at play in the healing process of MI and subsequent remodeling may  
407 ultimately lead to new treatments. Targeted activation of M2-like macrophages might enhance  
408 the endogenous repair mechanism in senescent cardiac fibroblasts and serve as an approach to  
409 treatment for MI.

410

#### 411 **Acknowledgments**

412 MS and KS conceived and designed the study. MS conducted most of the experiments and  
413 acquired the data with support from AY and KS. All authors participated in the analysis and  
414 interpretation of the data. MS and KS primarily wrote and edited the manuscript with input from  
415 all other authors. We thank Ellen Knapp, PhD, and Mitchell Arico from Edanz Group ([https://en-  
416 author-services.edanz.com/ac](https://en-author-services.edanz.com/ac)) for editing a draft of this manuscript. We wish to thank Ms.  
417 Wendy Alexander-Adams for her assistance in reporting our findings in English.

418

419

#### 420 **Sources of Funding**

421 This project was funded by the Uehara Memorial Foundation, SENSHIN Medical Research  
422 Foundation, a Grant-in-Aid for Scientific Research (C), the Mochida Memorial Foundation for  
423 Medical and Pharmaceutical Research, Takeda Science Foundation, and Public Trust Surgery  
424 Research Fund.

425

426 **Disclosures**

427 The authors have that no conflicts of interest to disclose.

428

429 **SUPPLEMENTAL MATERIALS**

430 Supplemental Methods

431 Online Figures I–XII

432

433 **References**

- 434 1. Zhu F, Li Y, Zhang J, Piao C, Liu T, Li HH, Du J. Senescent cardiac fibroblast is critical for  
435 cardiac fibrosis after myocardial infarction. *PLoS One*. 2013;8:e74535.
- 436 2. Dickstein K, Cohen-Solal A, Filippatos G, et al.; ESC Committee for Practice Guidelines  
437 (CPG). ESC Guidelines for the diagnosis and treatment of acute and chronic heart failure  
438 2008: the Task Force for the Diagnosis and Treatment of Acute and Chronic Heart Failure  
439 2008 of the European Society of Cardiology. Developed in collaboration with the Heart  
440 Failure Association of the ESC (HFA) and endorsed by the European Society of Intensive  
441 Care Medicine (ESICM). *Eur Heart J*. 2008;29:2388-2442.
- 442 3. Gemberling M, Karra R, Dickson AL, Poss KD. Nrg1 is an injury-induced cardiomyocyte  
443 mitogen for the endogenous heart regeneration program in zebrafish. *Elife*. 2015;4.
- 444 4. Gould KE, Taffet GE, Michael LH, et al. Heart failure and greater infarct expansion in  
445 middle-aged mice: a relevant model for postinfarction failure. *Am J Physiol Heart Circ*  
446 *Physiol*. 2002;282:H615-21.
- 447 5. Takemura G, Ohno M, Hayakawa Y, Misao J, Kanoh M, Ohno A, Uno Y, Minatoguchi S,  
448 Fujiwara T, Fujiwara H. Role of apoptosis in the disappearance of infiltrated and  
449 proliferated interstitial cells after myocardial infarction. *Circ Res*. 1998;82:1130-1138.
- 450 6. Shih H, Lee B, Lee RJ, Boyle AJ. The aging heart and post-infarction left ventricular  
451 remodeling. *J Am Coll Cardiol*. 2011;57:9-17.
- 452 7. Sharpless NE, Sherr CJ. Forging a signature of in vivo senescence. *Nat Rev Cancer*.  
453 2015;15:397-408.
- 454 8. Munoz-Espin D, Serrano M. Cellular senescence: from physiology to pathology. *Nat Rev*  
455 *Mol Cell Biol*. 2014;15:482-496.

- 456 9. Coppe JP, Desprez PY, Krtolica A, Campisi J. The senescence-associated secretory  
457 phenotype: the dark side of tumor suppression. *Annu Rev Pathol.* 2010;5:99-118.
- 458 10. Alam P, Haile B, Arif M, et al. Inhibition of senescence-associated genes Rb1 and Meis2 in  
459 adult cardiomyocytes results in cell cycle reentry and cardiac repair post-myocardial  
460 infarction. *J Am Heart Assoc.* 2019;8:e012089.
- 461 11. Hayakawa K, Takemura G, Kanoh M, et al. Inhibition of granulation tissue cell apoptosis  
462 during the subacute stage of myocardial infarction improves cardiac remodeling and  
463 dysfunction at the chronic stage. *Circulation.* 2003;108:104-109.
- 464 12. Aurora AB, Porrello ER, Tan W, Mahmoud AI, Hill JA, Bassel-Duby R, Sadek HA, Olson  
465 EN. Macrophages are required for neonatal heart regeneration. *J Clin Invest.*  
466 2014;124:1382-1392.
- 467 13. Shiraishi M, Shintani Y, Shintani Y, Ishida H, Saba R, Yamaguchi A, Adachi H, Yashiro K,  
468 Suzuki K. Alternatively activated macrophages determine repair of the infarcted adult  
469 murine heart. *J Clin Invest.* 2016;126:2151-2166.
- 470 14. Meyer D, Yamaai T, Garratt A, Riethmacher-Sonnenberg E, Kane D, Theill LE, Birchmeier  
471 C. Isoform-specific expression and function of neuregulin. *Development.* 1997;124:3575-  
472 3586.
- 473 15. Fuller SJ, Sivarajah K, Sugden PH. ErbB receptors, their ligands, and the consequences of  
474 their activation and inhibition in the myocardium. *J Mol Cell Cardiol.* 2008;44:831-854.
- 475 16. Bersell K, Arab S, Haring B, Kuhn B. Neuregulin1/ErbB4 signaling induces cardiomyocyte  
476 proliferation and repair of heart injury. *Cell.* 2009;138:257-270.

- 477 17. Hedhli N, Huang Q, Kalinowski A, Palmeri M, Hu X, Russell RR, Russell KS.  
478 Endothelium-derived neuregulin protects the heart against ischemic injury. *Circulation*.  
479 2011;123:2254-2262.
- 480 18. Polizzotti BD, Ganapathy B, Walsh S, Choudhury S, Ammanamanchi N, Bennett DG, dos  
481 Remedios CG, Haubner BJ, Penninger JM, Kuhn B. Neuregulin stimulation of  
482 cardiomyocyte regeneration in mice and human myocardium reveals a therapeutic window.  
483 *Sci Transl Med*. 2015;7:281ra45.
- 484 19. Lemmens K, Doggen K, De Keulenaer GW. Role of neuregulin-1/ErbB signaling in  
485 cardiovascular physiology and disease: implications for therapy of heart failure.  
486 *Circulation*. 2007;116:954-960.
- 487 20. Kirabo A, Ryzhov S, Gupte M, Sengsayadeth S, Gumina RJ, Sawyer DB, Galindo CL.  
488 Neuregulin-1beta induces proliferation, survival and paracrine signaling in normal human  
489 cardiac ventricular fibroblasts. *J Mol Cell Cardiol*. 2017;105:59-69.
- 490 21. Vermeulen Z, Hervent AS, Dugaucquier L, et al. Inhibitory actions of the NRG-1/ErbB4  
491 pathway in macrophages during tissue fibrosis in the heart, skin, and lung. *Am J Physiol*  
492 *Heart Circ Physiol*. 2017;313:H934-H945.
- 493 22. Pascual-Gil S, Abizanda G, Iglesias E, Garbayo E, Prosper F, Blanco-Prieto MJ. NRG1  
494 PLGA MP locally induce macrophage polarisation toward a regenerative phenotype in the  
495 heart after acute myocardial infarction. *J Drug Target*. 2019;27:573-581.
- 496 23. Krizhanovsky V, Yon M, Dickins RA, Hearn S, Simon J, Miething C, Yee H, Zender L,  
497 Lowe SW. Senescence of activated stellate cells limits liver fibrosis. *Cell*. 2008;134:657-  
498 667.
- 499 24. van Deursen JM. The role of senescent cells in ageing. *Nature*. 2014;509:439-446.

- 500 25. Olayioye MA, Neve RM, Lane HA, Hynes NE. The ErbB signaling network: receptor  
501 heterodimerization in development and cancer. *EMBO J.* 2000;19:3159-3167.
- 502 26. Uray IP, Connelly JH, Thomazy V, Shipley GL, Vaughn WK, Frazier OH, Taegtmeier H,  
503 Davies PJ. Left ventricular unloading alters receptor tyrosine kinase expression in the  
504 failing human heart. *J Heart Lung Transplant.* 2002;21:771-782.
- 505 27. Suzuki T, Arumugam P, Sakagami T, et al. Pulmonary macrophage transplantation therapy.  
506 *Nature.* 2014;514:450-454.
- 507 28. van den Borne SW, Diez J, Blankesteyn WM, Verjans J, Hofstra L, Narula J. Myocardial  
508 remodeling after infarction: the role of myofibroblasts. *Nat Rev Cardiol.* 2010;7:30-7.
- 509 29. Shinde AV, Frangogiannis NG. Fibroblasts in myocardial infarction: a role in inflammation  
510 and repair. *J Mol Cell Cardiol.* 2014;70:74-82.
- 511 30. Park S, Jiang Z, Mortenson ED, et al. The therapeutic effect of anti-HER2/neu antibody  
512 depends on both innate and adaptive immunity. *Cancer Cell.* 2010;18:160-170.
- 513 31. ElZarrad MK, Mukhopadhyay P, Mohan N, Hao E, Dokmanovic M, Hirsch DS, Shen Y,  
514 Pacher P, Wu WJ. Trastuzumab alters the expression of genes essential for cardiac function  
515 and induces ultrastructural changes of cardiomyocytes in mice. *PLoS One.* 2013;8:e79543.
- 516 32. Bladier C, Wolvetang EJ, Hutchinson P, de Haan JB, Kola I. Response of a primary human  
517 fibroblast cell line to H<sub>2</sub>O<sub>2</sub>: senescence-like growth arrest or apoptosis? *Cell Growth Differ.*  
518 1997;8:589-598.
- 519 33. Sasaki M, Miyakoshi M, Sato Y, Nakanuma Y. Modulation of the microenvironment by  
520 senescent biliary epithelial cells may be involved in the pathogenesis of primary biliary  
521 cirrhosis. *J Hepatol.* 2010;53:318-325.



- 522 34. Childs BG, Durik M, Baker DJ, van Deursen JM. Cellular senescence in aging and age-  
523 related disease: from mechanisms to therapy. *Nat Med.* 2015;21:1424-435.
- 524 35. Serrano M, Lin AW, McCurrach ME, Beach D, Lowe SW. Oncogenic ras provokes  
525 premature cell senescence associated with accumulation of p53 and p16INK4a. *Cell.*  
526 1997;88:593-602.
- 527 36. Kuramochi Y, Cote GM, Guo X, Lebrasseur NK, Cui L, Liao R, Sawyer DB. Cardiac  
528 endothelial cells regulate reactive oxygen species-induced cardiomyocyte apoptosis through  
529 neuregulin-1beta/erbB4 signaling. *J Biol Chem.* 2004;279:51141-51147.
- 530 37. Baliga RR, Pimental DR, Zhao YY, Simmons WW, Marchionni MA, Sawyer DB, Kelly  
531 RA. NRG-1-induced cardiomyocyte hypertrophy. Role of PI-3-kinase, p70(S6K), and  
532 MEK-MAPK-RSK. *Am J Physiol.* 1999;277:H2026-H2037.
- 533 38. Deng C, Zhang P, Harper JW, Elledge SJ, Leder P. Mice lacking p21CIP1/WAF1 undergo  
534 normal development, but are defective in G1 checkpoint control. *Cell.* 1995;82:675-684.
- 535 39. Wang YA, Elson A, Leder P. Loss of p21 increases sensitivity to ionizing radiation and  
536 delays the onset of lymphoma in atm-deficient mice. *Proc Natl Acad Sci U S A.*  
537 1997;94:14590-14595.
- 538 40. Alcorta DA, Xiong Y, Phelps D, Hannon G, Beach D, Barrett JC. Involvement of the cyclin-  
539 dependent kinase inhibitor p16 (INK4a) in replicative senescence of normal human  
540 fibroblasts. *Proc Natl Acad Sci U S A.* 1996;93:13742-7.
- 541 41. Stein GH, Drullinger LF, Soulard A, Dulic V. Differential roles for cyclin-dependent kinase  
542 inhibitors p21 and p16 in the mechanisms of senescence and differentiation in human  
543 fibroblasts. *Mol Cell Biol.* 1999;19:2109-2117.

- 544 42. Yu JS, Cui W. Proliferation, survival and metabolism: the role of PI3K/AKT/mTOR  
545 signalling in pluripotency and cell fate determination. *Development*. 2016;143:3050-3060.
- 546 43. Ikeda N, Asano K, Kikuchi K, et al. Emergence of immunoregulatory Ym1(+)Ly6C(hi)  
547 monocytes during recovery phase of tissue injury. *Sci Immunol*. 2018;3.eaat0207.
- 548 44. Acosta JC, Banito A, Wuestefeld T, et al. A complex secretory program orchestrated by the  
549 inflammasome controls paracrine senescence. *Nat Cell Biol*. 2013;15:978-990.
- 550 45. Tano N, Narita T, Kaneko M, Ikebe C, Coppen SR, Campbell NG, Shiraishi M, Shintani Y,  
551 Suzuki K. Epicardial placement of mesenchymal stromal cell-sheets for the treatment of  
552 ischemic cardiomyopathy; in vivo proof-of-concept study. *Mol Ther*. 2014;22:1864-1871.
- 553 46. Leicht M, Greipel N, Zimmer H. Comitogenic effect of catecholamines on rat cardiac  
554 fibroblasts in culture. *Cardiovasc Res*. 2000;48:274-284.
- 555 47. Shintani Y, Kapoor A, Kaneko M, et al. TLR9 mediates cellular protection by modulating  
556 energy metabolism in cardiomyocytes and neurons. *Proc Natl Acad Sci U S A*.  
557 2013;110:5109-14.  
558

559 **Figure legends**

560

561 **Figure 1. Myocardial infarction (MI) induces apoptosis and senescence of cardiac**

562 **fibroblasts and upregulates *Nrg1* expression in infarcted myocardium.**

563 **A,** Double immunofluorescence staining for Thy1 and cleaved caspase 3 (CC3), performed on

564 post-MI days 7 and 28, revealed a significantly increased number of apoptotic cardiac

565 fibroblasts in the infarct area, relative to the number seen in the remote area. Scale bars: 100

566  $\mu\text{m}$ .  $n=4$  samples each.

567 **B,** Staining for senescence-associated beta-galactosidase (SA- $\beta$ -gal) on post-MI days 7 and 28

568 revealed a significantly increased accumulation of spindle-shaped senescent cells in the

569 infarct area relative to that in the remote area. Scale bars: 100  $\mu\text{m}$ .

570 **C,** Quantitative reverse transcription-polymerase chain reaction (qRT-PCR) revealed significant

571 upregulation of senescence-associated genes (*p16* and *Glb1*) in the infarct area on post-MI

572 day 7 or 28 or both.  $n=4$  samples each.

573 **D,** qRT-PCR analysis confirmed significant upregulation of *Nrg1* in the infarct area on post-MI

574 day 7.  $n=4$  samples each.

575 **E,** On immunohistochemistry, the Thy1<sup>+</sup>ErbB2<sup>+</sup> fibroblast/Thy1<sup>+</sup> fibroblast ratio and the

576 Thy1<sup>+</sup>ErbB4<sup>+</sup> fibroblast/Thy1<sup>+</sup> fibroblast ratio determined on post-MI day 7 and 28 were

577 found to be significantly increased. Scale bars: 100  $\mu\text{m}$ .  $n=4$  samples each. Gene expression

578 levels relative to those in non-MI heart (Day 0) are given. Mean $\pm$ SEM values are shown

579 \* $P<0.05$ , \*\* $P<0.01$ , \*\*\* $P<0.005$  versus the remote area; # $P<0.05$ , ## $P<0.01$ , ### $P<0.005$

580 versus non-MI heart; 1-way ANOVA.

581

582 **Figure 2. M2-like macrophages accumulate in the infarct area and express Nrg1.**

583 **A,** Immunohistochemistry revealed increased accumulation of CD206<sup>+</sup> M2-like macrophages in  
584 the infarct area, which peaked on post-MI day 7. Scale bars: 100  $\mu$ m.  $n=4$  samples each.

585 Mean $\pm$ SEM values are shown.

586 \* $P<0.05$ , \*\* $P<0.01$ , \*\*\* $P<0.005$  versus the remote area; # $P<0.05$ , ## $P<0.01$ , ### $P<0.005$   
587 versus non-MI heart; 1-way ANOVA.

588 **B,** Flow cytometric analysis confirmed the presence of CD206<sup>+</sup>F4/80<sup>+</sup>CD11b<sup>+</sup> M2-like  
589 macrophages in normal (non-MI) hearts of adult C57BL/6 mice and in hearts of mice  
590 subjected to MI.  $n=6$  samples each.

591 **C,** Microarray analysis showed the M2 macrophages after MI to have a different expression  
592 profile from that of M2 macrophages in hearts not subjected to MI. The scatter plot shows  
593 upregulation of 70 genes and downregulated of 39 genes in M2-like macrophages after MI  
594 compared to M2-like macrophages. Among the upregulated genes is neuregulin 1 (*Nrg1*).

595 **D,** Quantitative reverse transcription-polymerase chain reaction confirmed post-MI upregulation  
596 of *Nrg1* in CD206<sup>+</sup>F4/80<sup>+</sup>CD11b<sup>+</sup> cardiac M2-like macrophages after MI.  $n=4$  samples each.  
597 Gene expression levels relative to those in M2-like macrophages from normal hearts are  
598 shown. Mean $\pm$ SEM values are shown.

599 # $P<0.05$ , ## $P<0.01$ , ### $P<0.005$  versus M2-like macrophages from normal hearts, 2-tailed,  
600 unpaired Student's *t*-test.

601 **E,** Double immunofluorescence staining revealed Nrg1 expression on the surface of CD206<sup>+</sup>  
602 M2-like macrophages. Scale bars: 100  $\mu$ m.  $n=4$  samples each.

603

604 **Figure 3. Bone marrow-derived macrophages (BMDMs) attenuate H<sub>2</sub>O<sub>2</sub>-induced apoptosis**  
605 **and senescence of cardiac fibroblasts via Nrg1 secretion.**

606 **A,** Representative phase-contrast microscopy images. Treatment with a hydrogen peroxide  
607 (H<sub>2</sub>O<sub>2</sub>) solution changed the spindle-shaped appearance of cardiac fibroblasts to a  
608 significantly enlarged, flattened morphology. Addition of bone marrow-derived macrophages  
609 (BMDMs) altered the senescent morphology to a normal, spindle-shaped morphology. After  
610 addition of anti-ErbB antibody (Ab), fibroblasts displayed the same gross morphology as that  
611 of senescent fibroblasts treated with H<sub>2</sub>O<sub>2</sub>. Likewise, addition of recombinant neuregulin 1  
612 (Nrg1) changed the gross morphology to a spindle shape. Scale bars: 100 μm. *n*=4 samples  
613 each.

614 **B.** Staining for SA-β-gal showed that senescence was exacerbated in H<sub>2</sub>O<sub>2</sub>-treated fibroblasts but  
615 not in fibroblasts cocultured with BMDMs. This suppression of senescence was attenuated by  
616 coculture with the anti-ErbB Ab. Nrg1 suppressed fibroblast senescence. Scale bars: 100 μm.  
617 *n*=4 samples each.

618 **C.** Apoptosis of cardiac fibroblasts (ratio of cleaved caspase 3<sup>+</sup>DAPI<sup>+</sup> fibroblasts to DAPI<sup>+</sup>  
619 fibroblasts) was increased in coculture with H<sub>2</sub>O<sub>2</sub> but decreased in coculture with BMDMs.  
620 This decrease in apoptosis was eliminated by the anti-ErbB Ab. Nrg1 suppressed apoptosis.  
621 Nuclei were counterstained with 4',6-diamidino-2-phenylindole (DAPI). *n*=4 samples each.  
622 Scale bars: 100 μm.

623 **D,** Proliferation of cardiac fibroblasts (ratio of Ki-67<sup>+</sup> and DAPI<sup>+</sup> fibroblasts to DAPI<sup>+</sup>  
624 fibroblasts) was decreased under H<sub>2</sub>O<sub>2</sub> treatment but increased when cells were cocultured  
625 with BMDMs. This enhanced proliferation was suppressed by the anti-ErbB Ab. Nrg1

626 accelerated proliferation. Nuclei were counterstained with DAPI. Scale bars: 50  $\mu\text{m}$ .  $n=4$   
627 samples each. Mean $\pm$ SEM values are shown.  
628 <sup>#</sup> $P<0.05$  versus normal cardiac fibroblasts (control), <sup>\*</sup> $P<0.05$  versus  $\text{H}_2\text{O}_2$ , <sup>‡</sup> $P<0.05$  versus  
629  $\text{H}_2\text{O}_2$ +BMDMs, <sup>†</sup> $P<0.05$  versus  $\text{H}_2\text{O}_2$ +BMDMs+Ab, <sup>§</sup> $P<0.05$  versus  $\text{H}_2\text{O}_2$ +Nrg1; 1-way  
630 ANOVA.

631

632 **Figure 4. Bone marrow-derived macrophages (BMDMs) promote fibroblast activation and**  
633 **collagen synthesis.**

634 **A–C.** Representative images of cardiac fibroblasts stained immunocytochemically for (A)  
635 vimentin and  $\alpha\text{SMA}$ , (B) vimentin and collagen I, and (C) vimentin and collagen III. The  
636 staining was performed 48 hours after the start of culture.

637 **A,** Activation of cardiac fibroblasts (ratio of vimentin<sup>+</sup> and  $\alpha\text{SMA}$ <sup>+</sup> myofibroblasts to vimentin<sup>+</sup>  
638 fibroblasts) was equal under treatment with hydrogen peroxide ( $\text{H}_2\text{O}_2$ ) but markedly  
639 increased when cells were cocultured with bone marrow-derived macrophages (BMDMs).  
640 This increase in activation was accelerated by the anti-ErbB antibody (Ab). Addition of  
641 recombinant neuregulin 1 (Nrg1) did not affect activation. Scale bars: 100  $\mu\text{m}$ .  $n=4$  samples  
642 each.

643 **B.** Collagen I synthesis was equal under treatment with  $\text{H}_2\text{O}_2$  but significantly increased when  
644 cells were cocultured with BMDMs. This increase in production was enhanced by treatment  
645 with anti-ErbB Ab. Addition of Nrg1 did not affect collagen I synthesis. Scale bars: 100  $\mu\text{m}$ .  
646  $n=4$  samples each.

647 **C.** Collagen III synthesis was similar to collagen I synthesis. Scale bars: 100  $\mu\text{m}$ .  $n=4$  samples  
648 each. Mean $\pm$ SEM values are shown.

649 <sup>#</sup> $P < 0.05$  versus normal cardiac fibroblasts (control), <sup>\*</sup> $P < 0.05$  versus  $H_2O_2$ , <sup>‡</sup> $P < 0.05$  versus  
650  $H_2O_2$ +BMDMs, <sup>†</sup> $P < 0.05$  versus  $H_2O_2$ +BMDMs+Ab, <sup>§</sup> $P < 0.05$  versus  $H_2O_2$ +Nrg1; 1-way  
651 ANOVA.

652

653 **Figure 5. PI3K/Akt signaling pathway is associated with BMDM-attenuated apoptosis and**  
654 **senescence of cardiac fibroblasts through Nrg1.**

655 **A.** Representative bands of PI3K, pPI3K, Akt, pAkt, and  $\beta$ -actin in cardiac fibroblasts treated (or  
656 not treated ) with hydrogen peroxide ( $H_2O_2$ ), in those cocultured with bone marrow-derived  
657 macrophages (BMDMs), and those treated (or not treated) with anti-ErbB antibody  
658 (Ab)/recombinant neuregulin 1 (Nrg1). Treatment and coculture lasted 48 hours. Bar graph  
659 shows quantification of relative pPI3k/PI3k and pAkt/Akt.  $H_2O_2$  alone did not affect activation  
660 of PI3K/AKT signaling in fibroblasts. Addition of BMDMs significantly activated the signaling  
661 pathway and, conversely, addition of the anti-ErbB Ab impaired it. Nrg1 re-stimulated the  
662 signaling pathway.  $n=4$  samples each.

663 **B.** Quantitative reverse transcription-polymerase chain reaction analysis of cardiac fibroblasts  
664 having been treated (or not) with  $H_2O_2$ , co-cultured with BMDMs, and treated (or not) with  
665 anti-ErbB Ab/Nrg1. Treatment and coculture lasted 48 hours. Expression levels of  
666 senescence-associated genes (*p21*, *p16*, and *Glb1*) were increased in cells treated with  $H_2O_2$   
667 but decreased with the addition of BMDMs. Addition of the anti-ErbB Ab exacerbated  
668 senescence and, conversely, addition of Nrg1 suppressed it.  $n=4$  samples each.

669 **C.** Expression of cell cycle-associated genes (*Cdk4*, *Cdk6*, *Cdk2*, and *Ki-67*) were suppressed in  
670 cells treated with  $H_2O_2$  but restored in cells cocultured with BMDMs. Addition of anti-ErbB

671 Ab decreased such expression and, conversely, addition of Nrg1 restored such expression.

672  $n=4$  samples each.

673 **D**, Expression of the p53 suppressor gene (*MDM2*) was significantly increased in cells

674 cocultured with BMDMs.  $n=4$  samples each.

675 **E**, Expression of cell survival-associated gene (*mTOR*) was suppressed in cells treated with  $H_2O_2$

676 but restored in cells cocultured with BMDMs. Addition of anti-ErbB Ab re-suppressed the

677 expression and, conversely, addition of Nrg1 restored the *mTOR* expression.

678 **F**, Expression of senescence-associated secretory phenotype-associated gene (*IL-6*) was

679 significantly increased in cells treated with  $H_2O_2$  and in those cocultured with BMDMs, with

680 ErbB Ab having been added.  $n=4$  samples each.

681 **G**, Schematic representation and overview of the Nrg1/PI3K/AKT pathway.  $H_2O_2$  treatment

682 contributes to the development of cellular damage, which leads to senescence, cell cycle

683 arrest. Nrg1 binding to coreceptor ErbB2/ErbB4 leads to activation of PI3K/AKT and

684 inactivation of p53 and p21, which results in anti-senescence, cell survival and proliferation.

685 Arrowheads indicate stimulation, whereas hammerheads represent inhibition. Gene

686 expression levels relative to the normal cardiac fibroblasts (control) are given. Mean $\pm$ SEM

687 values are shown.

688 <sup>#</sup> $P<0.05$  versus control, <sup>\*</sup> $P<0.05$  versus  $H_2O_2$ , <sup>‡</sup> $P<0.05$  versus  $H_2O_2$ +BMDMs, <sup>†</sup> $P<0.05$

689 versus  $H_2O_2$ +BMDMs+Ab, <sup>§</sup> $P<0.05$  versus  $H_2O_2$ +Nrg1; 1-way ANOVA.

690

691 **Figure 6. In vivo inhibition of Nrg1 signaling promotes apoptosis and senescence of cardiac**

692 **fibroblasts.**



693 **A**, Quantitative reverse transcription-polymerase chain reaction (qRT-PCR) analysis showed  
694 post-myocardial infarction (MI) upregulation of senescence-associated genes (*p21*, *p16*, and  
695 *Glb1*) in the infarct area after intraperitoneal injection of the mice with trastuzumab in  
696 comparison to expression of these genes in vehicle injected post-MI heart.  $n=4$  samples each.

697 **B**, Double immunofluorescence staining of Thy1 and cleaved caspase 3 (CC3) showed the ratio  
698 of apoptotic cardiac fibroblasts in the infarct area to be increased on post-MI days 7, 14, and  
699 28 in mice injected intraperitoneally with trastuzumab compared with that in mice injected  
700 with vehicle only. Arrow shows Thy1<sup>+</sup>CC3<sup>+</sup> cells. Scale bars: 100  $\mu\text{m}$ .  $n=4$  samples each.

701 **C**, SA- $\beta$ -gal staining revealed increased senescence of cardiac cells in the infarct area on post-MI  
702 days 7 and 14 after intraperitoneal trastuzumab injection compared with senescence after  
703 vehicle injection. Scale bars: 100  $\mu\text{m}$ .  $n=4$  samples each. Gene expression levels relative to  
704 levels in non-MI heart (day 0) are given. Mean $\pm$ SEM values are shown.

705 \* $P<0.05$ , \*\* $P<0.01$ , \*\*\* $P<0.005$  versus other sample(s); # $P<0.05$ , ## $P<0.01$ , ### $P<0.005$   
706 versus non-MI heart; 1-way ANOVA.

707

708 **Figure 7. In vivo inhibition of Nrg1 signaling activates cardiac fibroblasts and exacerbates**  
709 **fibrosis.**

710 **A**, Masson trichrome staining demonstrated that deposition of collagen fibrils was increased in  
711 the infarct area with a time lapse. Intraperitoneal trastuzumab injection significantly increased  
712 collagen fibrils in the infarct area. Scale bars: 100  $\mu\text{m}$ .  $n=4$  samples each.

713 **B**, Double immunofluorescence staining of Thy1 and  $\alpha$ SMA showed increased accumulation and  
714 activation of cardiac fibroblasts in the infarct area following trastuzumab injection versus  
715 vehicle injection. Scale bars: 100  $\mu\text{m}$ .  $n=4$  samples each.

716 **C**, Quantitative reverse transcription-polymerase chain reaction (qRT-PCR) analysis showed  
717 post-MI upregulation of fibrosis-associated genes (*αSMA*, *Coll1a1*, and *Col3a1*) in mice after  
718 intraperitoneal trastuzumab injection compared with expression in mice after vehicle  
719 injection. *n*=4 samples each. Gene expression levels relative to levels in non-MI heart (day 0)  
720 are given. Mean±SEM values are shown.  
721 \**P*<0.05, \*\**P*<0.01, \*\*\**P*<0.005 versus other sample(s); #*P*<0.05, ##*P*<0.01, ###*P*<0.005  
722 versus the non-MI heart; 1-way ANOVA.

723

724 **Figure 8. *In vivo* inhibition of *Nrg1* signaling exacerbates myocardial inflammation and**  
725 ***promotes accumulation of M2-like macrophages.***

726 **A**, Quantitative reverse transcription-polymerase chain reaction analysis (qRT-PCR) showed  
727 post-myocardial infarction (MI) upregulation of senescence-associated secretory phenotype-  
728 associated genes (*CCL3*, *IL-6*, and *TNF*) in mice given trastuzumab by intraperitoneal  
729 injection compared with expression in vehicle-injected mice. *n*=4 samples each.

730 **B**, Immunohistochemistry showed intraperitoneal trastuzumab injection significantly accelerated  
731 accumulation of CD206<sup>+</sup> M2-like macrophages in the infarct area with a post-MI peak on day  
732 7. Scale bars: 100 μm. *n*=4 samples each. Gene expression levels relative to levels in non-MI  
733 heart (day 0) are given. Mean±SEM values are shown.

734 \**P*<0.05, \*\**P*<0.01, \*\*\**P*<0.005 versus other sample(s); #*P*<0.05 ##*P*<0.01, ###*P*<0.005  
735 versus non-MI heart; 1-way ANOVA.

736

737 **Table I. Primers used in PCR**

|                     | <b>Forward</b>               | <b>Reverse</b>              |
|---------------------|------------------------------|-----------------------------|
| <i>Arg1</i>         | 5'-CAAGACAGGGCTCCTTTTCAG-3'  | 5'-AAGCAAGCCAAGGTTAAAGC-3'  |
| <i>CCL3</i>         | 5'-CATGAAGGTCTCCACCACTG-3'   | 5'-CTCCATATGGCGCTGAGAA-3'   |
| <i>CD11b</i>        | 5'-CTGAGAAATGACGGTGAGGA-3'   | 5'-CAGCAGGCTTTACAAACCAA-3'  |
| <i>CD11c</i>        | 5'-GGTCCTACTGTGCACCCACAC-3'  | 5'-GACACTCCTGCTGTGCAGTT-3'  |
| <i>CD206</i>        | 5'-TGATTACGAGCAGTGGAAGC-3'   | 5'-GTTCCACCGTAAGCCCAATTT-3' |
| <i>p21 (Cdkn1a)</i> | 5'-GATCCACAGCGATATCCAGACA-3' | 5'-AGAGACAACGGCACACTTTG-3'  |
| <i>p16 (Cdkn2a)</i> | 5'-ATAGACTAGCCAGGGCAGCG-3'   | 5'-TTGCCCATCATCATCACCTGT-3' |
| <i>Coll1a1</i>      | 5'-TGAGCCAGCAGATTGAGAAC-3'   | 5'-CCAGTACTCTCCGCTCTTCC-3'  |
| <i>Col3a1</i>       | 5'-AGTCTGGAGTCGGAGGAATG-3'   | 5'-AGGATGTCCAGAGGAACCAG-3'  |
| <i>ErbB2</i>        | 5'-CTGAATACCATGCAGATGGG-3'   | 5'-TCACACCATAGCTCCACACA-3'  |
| <i>ErbB4</i>        | 5'-GAGGAAAGCCCTATGATGGA-3'   | 5'-TCCAACATTTGACCATGACC-3'  |
| <i>F4/80</i>        | 5'-CAACCTGCCACAACACTCTC-3'   | 5'-CCACATCTTCACAGGATTCG-3'  |
| <i>Fizz1</i>        | 5'-AGGAACTTCTTGCCAATCCA-3'   | 5'-ACAAGCACACCCAGTAGCAG-3'  |
| <i>Glb1</i>         | 5'-CGCTACATCTCGGGAAGCAT-3'   | 5'-GGGCACGTACGTCTGGATTG-3'  |
| <i>Gapdh</i>        | 5'-CCCCTGGCCAAGGTCATCCA-3'   | 5'-CGGAAGGCCATGCCAGTGAG-3'  |
| <i>IL-1α</i>        | 5'-CCATGATCTGGAAGAGACCA-3'   | 5'-GACAACTTCTGCCTGACGA-3'   |
| <i>IL-6</i>         | 5'-AGTCCGGAGAGGAGACTTCA-3'   | 5'-TTGCCATTGCACAACCTCTTT-3' |
| <i>Ki-67</i>        | 5'-TATCTGGGCCACCTACCTTC-3'   | 5'-GCTGTTTCCAGTCCGCTTAC-3'  |
| <i>MHC-II</i>       | 5'-ATTGCGAAAGCTGCAGAAC-3'    | 5'-TAGCAGCCAGTCATCCTTTG-3'  |
| <i>Nrg1</i>         | 5'-GAATTTATGGAAGCGGAGGA-3'   | 5'-CAGTAGGCCACCACACACAT-3'  |
| <i>Spp1</i>         | 5'-GAGGAAACCAGCCAAGGTAA-3'   | 5'-TAGTCCCTCAGAATTCAGCCA-3' |
| <i>Pdgfa</i>        | 5'-GAGGAGGAGACAGATGTGAGG-3'  | 5'-ATTGGCAATGAAGCACCATA-3'  |
| <i>Tgfb</i>         | 5'-CAACTTCTGTCTGGGACCCT-3'   | 5'-CGGGTTGTGTTGGTTGTAGA-3'  |
| <i>Tnf</i>          | 5'-TCGTAGCAAACCACCAAGTG-3'   | 5'-TTGTCTTTGAGATCCATGCC-3'  |
| <i>p53(Trp53)</i>   | 5'-GTTCCGAGAGCTGAATGAGG-3'   | 5'-TTATGGCGGGAGGTAGACTG-3'  |
| <i>Vegfr2</i>       | 5'-TGTGGCTTCCTGATGGCAGAA-3'  | 5'-AGAAACCAGTAGACATAGTTT-3' |
| <i>Vegfa</i>        | 5'-GTACCTCCACCATGCCAAGT-3'   | 5'-GCATTCACATCTGCTGTGCT-3'  |

738

739 **Table II. Antibodies used for immunocytochemistry**

| Primary antibodies                  | Host    | Dilution | Company        |          |
|-------------------------------------|---------|----------|----------------|----------|
|                                     |         |          | Catalogue      | No.      |
| AlexaFluor488-conjugated anti-CD206 | Rat     | 1:100    | BioLegend      | 141709   |
| anti-ErbB2                          | Rabbit  | 1:100    | Abcam          | Ab214275 |
| anti-ErbB4                          | Hamster | 1:100    | AbD Serotec    | MCA1369  |
| anti-CD90 (Thy1)                    | Rat     | 1:100    | eBioscience    | 14-0901  |
| anti- $\alpha$ SMA                  | Rabbit  | 1:100    | Abcam          | ab5694   |
| anti-Ki67                           | Rat     | 1:100    | eBioscience    | 14-5698  |
| anti-Cleaved caspase-3              | Rabbit  | 1:200    | Cell Signaling | 9661     |
| anti-Vimentin                       | Chicken | 1:100    | Abcam          | ab24525  |
| <b>Secondary antibodies</b>         |         |          |                |          |
| AlexaFluor 488-conjugated antibody  | Goat    | 1:300    | Invitrogen     | A-11006  |
| AlexaFluor 488-conjugated antibody  | Donkey  | 1:300    | Invitrogen     | A-21208  |
| AlexaFluor 488-conjugated antibody  | Goat    | 1:300    | Invitrogen     | A-11039  |
| AlexaFluor 594-conjugated antibody  | Goat    | 1:300    | Invitrogen     | A-11007  |
| AlexaFluor 594-conjugated antibody  | Goat    | 1:300    | Invitrogen     | A-11012  |

740

741 **Table III. Antibodies used for immunoblotting**

| <b>Primary antibodies</b>          | <b>Host</b> | <b>Dilution</b> | <b>Company<br/>Catalogue No.</b> |
|------------------------------------|-------------|-----------------|----------------------------------|
| Anti-PI3K p85 alpha (phospho Y607) | Rabbit      | 1:1000          | Abcam<br>ab182651                |
| Anti-phospho-Akt (Ser473)          | Rabbit      | 1:2000          | Cell Signaling<br>4060           |
| HRP-conjugated anti-PI3K           | Rabbit      | 1:5000          | Abcam<br>ab200773                |
| HRP-conjugated anti-Akt            | Rabbit      | 1:1000          | Cell Signaling<br>8596           |
| HRP-conjugated anti-beta Actin     | Mouse       | 1:50000         | Abcam<br>ab49900                 |
| <b>Secondary antibody</b>          |             |                 |                                  |
| HRP-conjugated anti-rabbit IgG     | Goat        | 1:1000          | Cell Signaling<br>7074S          |

742

**Figure 1.**

bioRxiv preprint doi: <https://doi.org/10.1101/2021.01.29.428912>; this version posted September 4, 2021. The copyright holder for this preprint (which was not certified by peer review) is the author/funder. All rights reserved. No reuse allowed without permission.

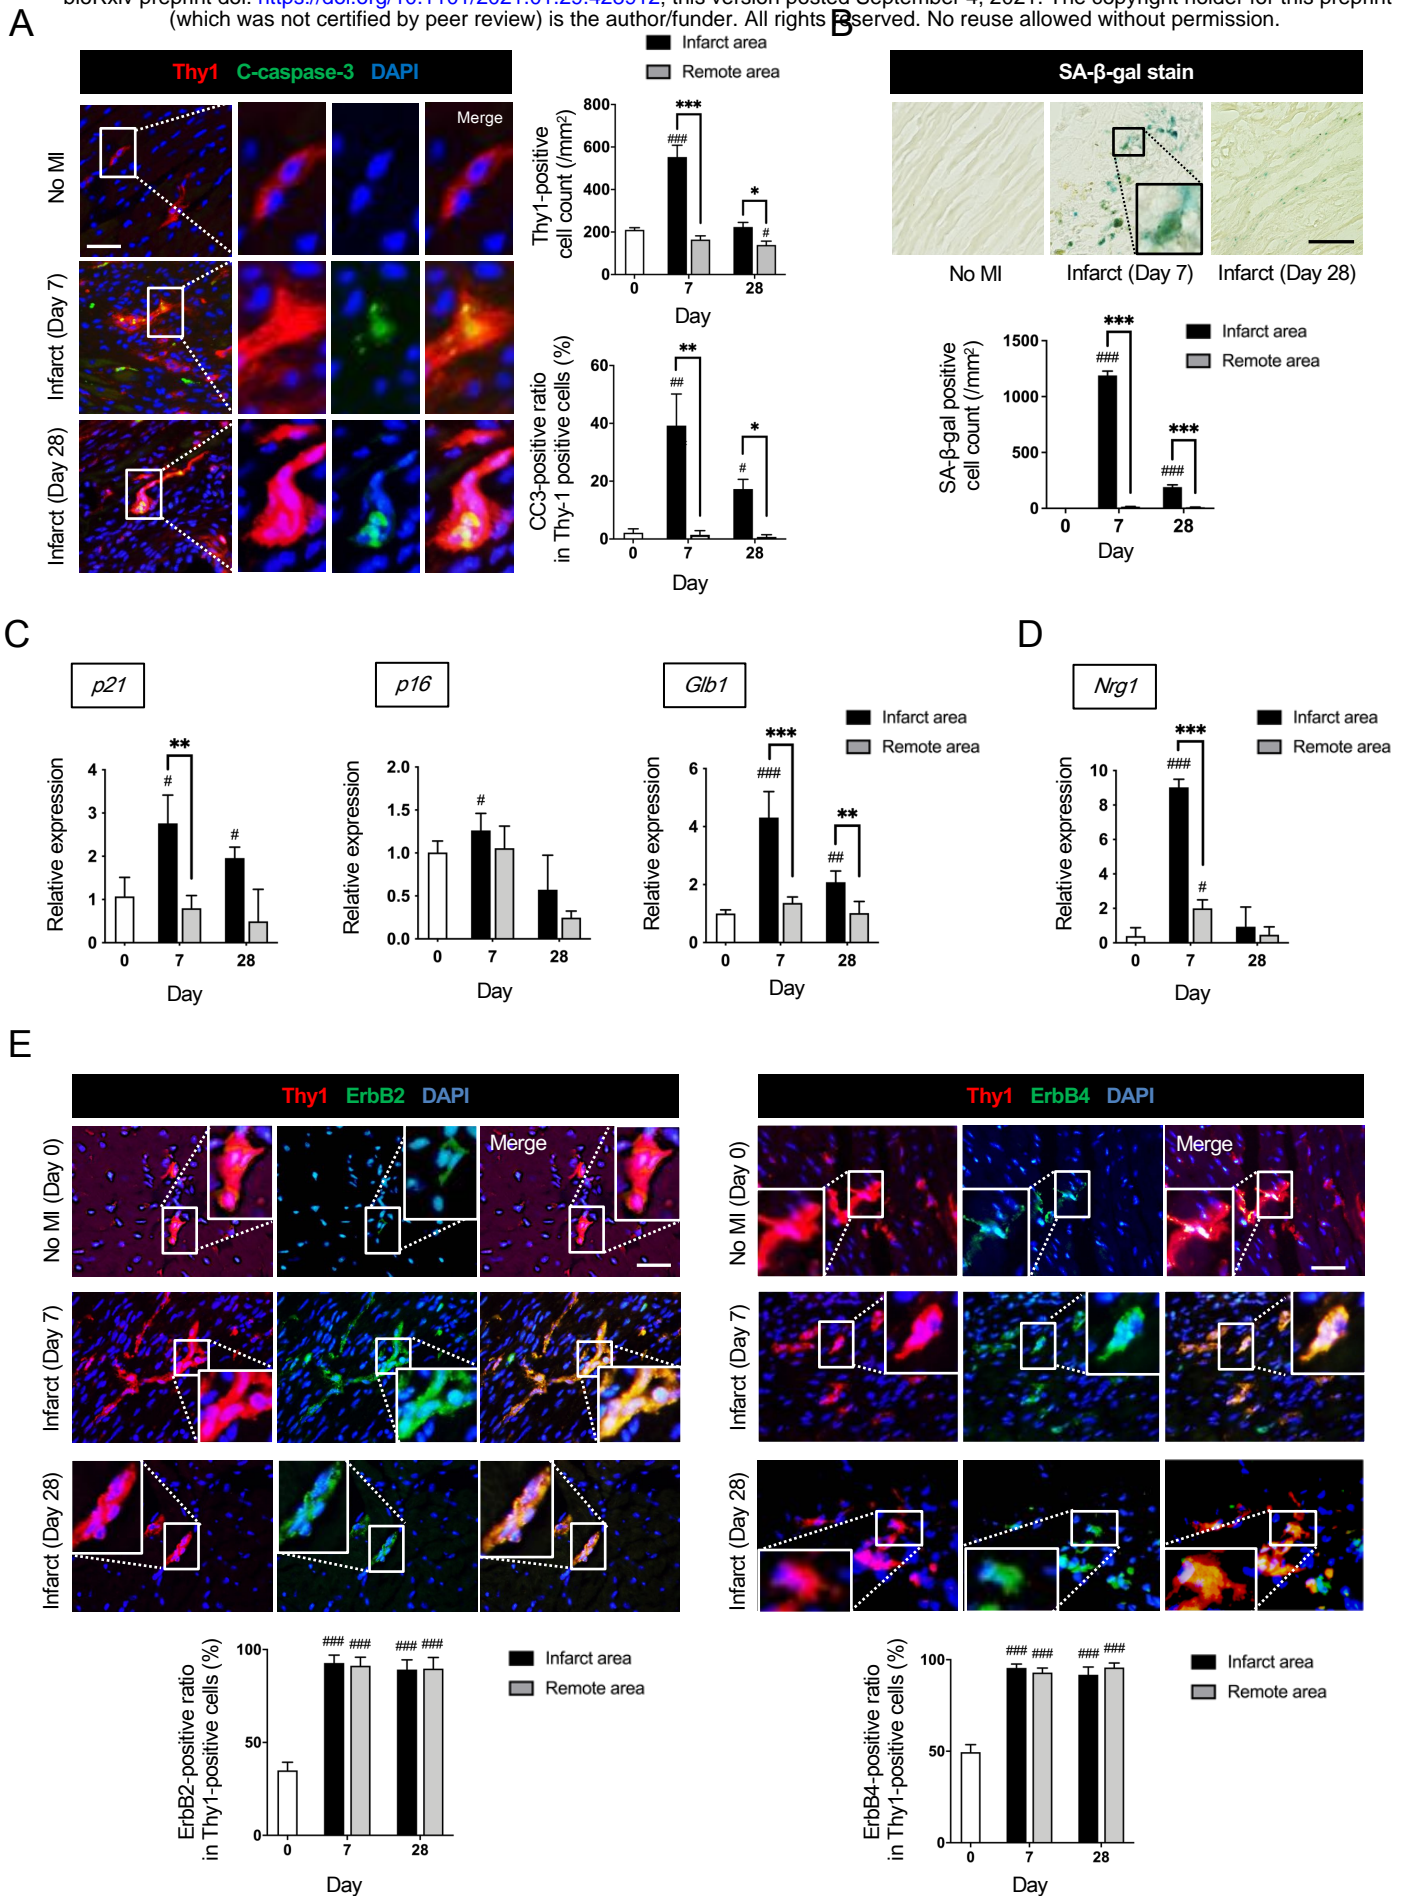

**Figure 2.**

bioRxiv preprint doi: <https://doi.org/10.1101/2021.01.29.428912>; this version posted September 4, 2021. The copyright holder for this preprint (which was not certified by peer review) is the author/funder. All rights reserved. No reuse allowed without permission.

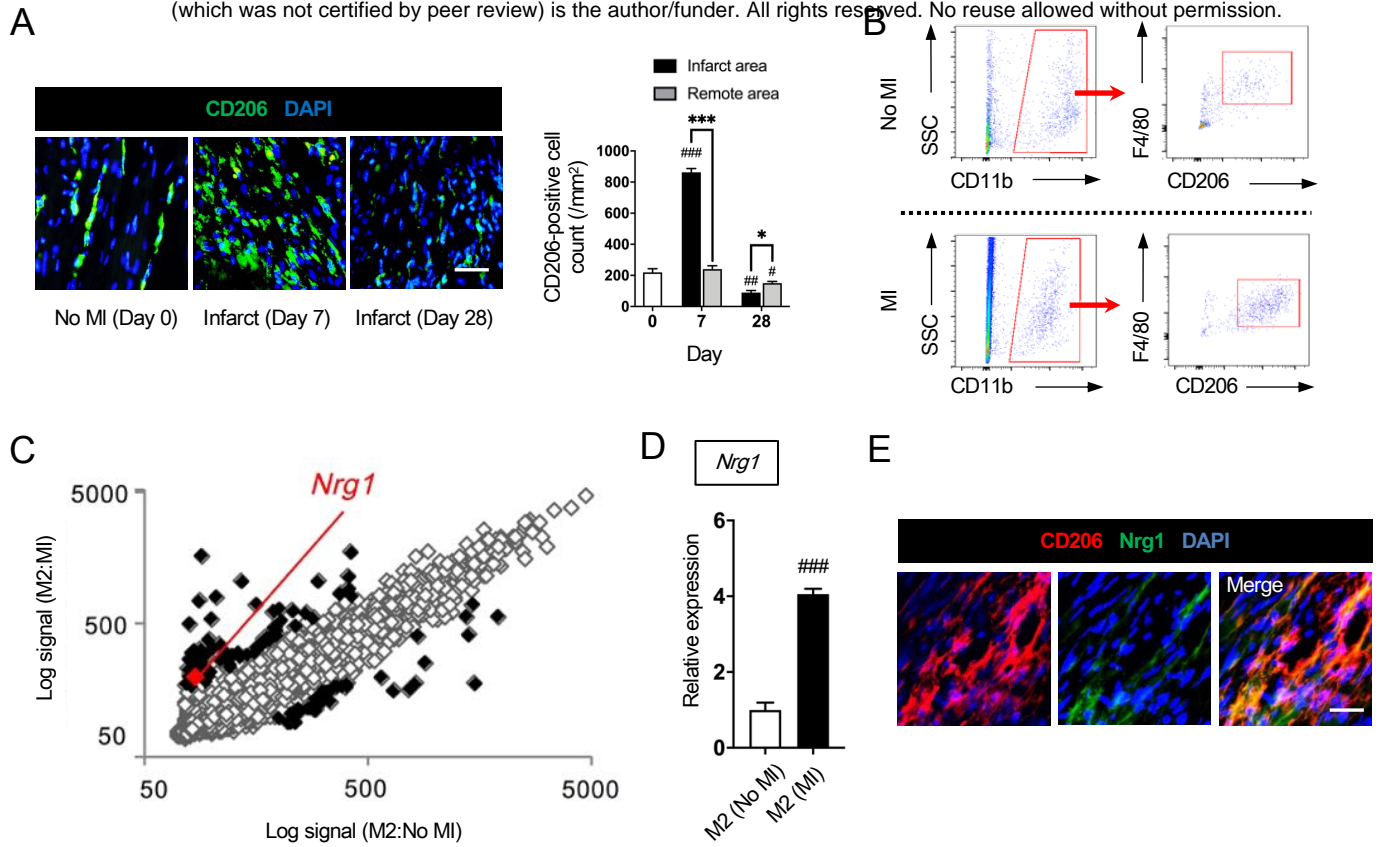

**Figure 3.**

bioRxiv preprint doi: <https://doi.org/10.1101/2021.01.29.428912>; this version posted September 4, 2021. The copyright holder for this preprint (which was not certified by peer review) is the author/funder. All rights reserved. No reuse allowed without permission.

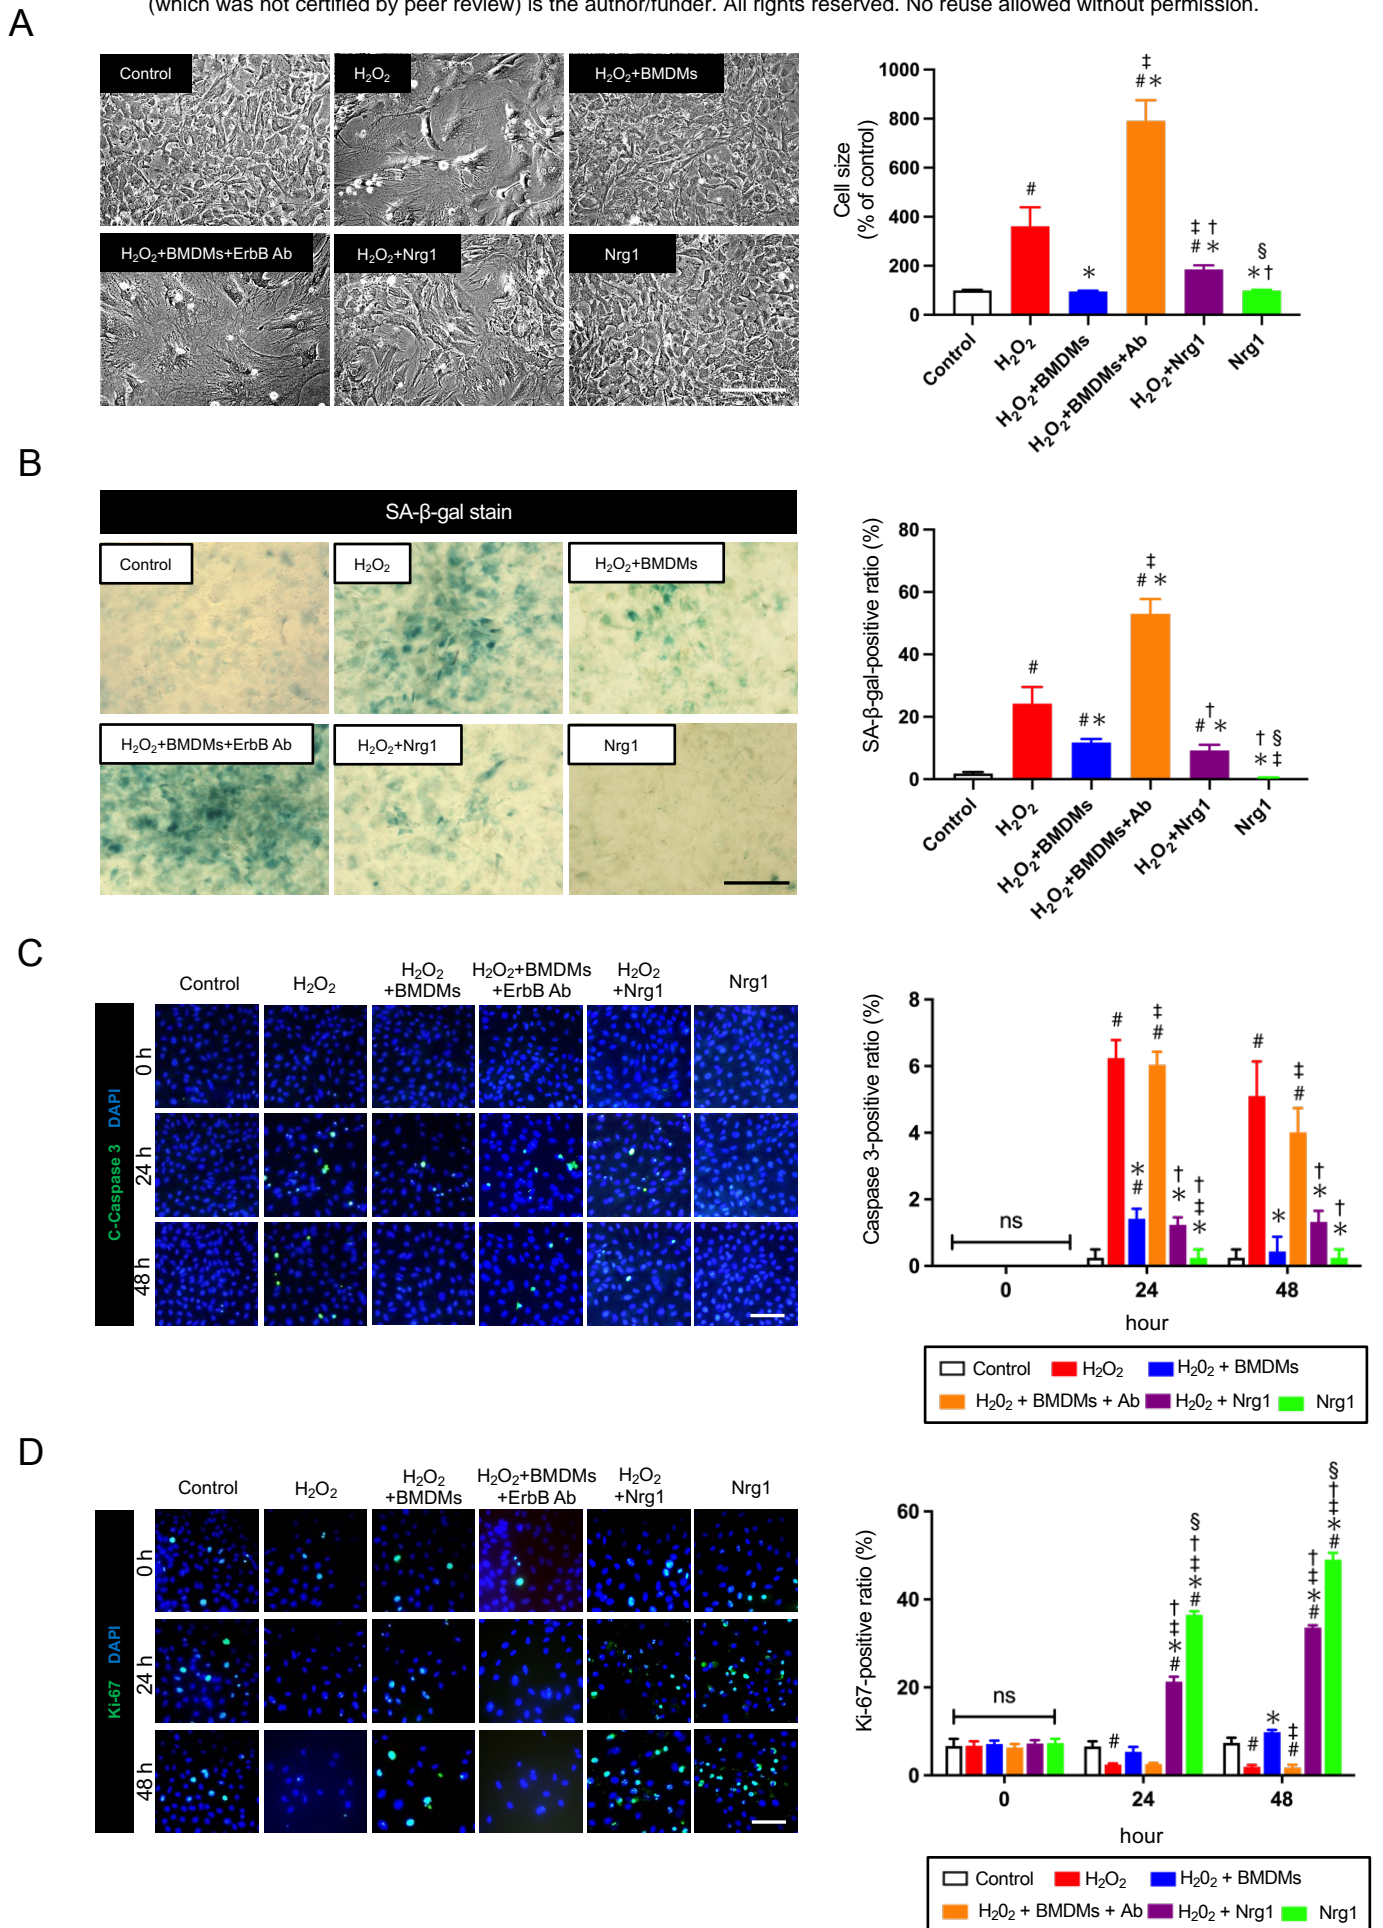



**Figure 4.**

bioRxiv preprint doi: <https://doi.org/10.1101/2021.01.29.428912>; this version posted September 4, 2021. The copyright holder for this preprint (which was not certified by peer review) is the author/funder. All rights reserved. No reuse allowed without permission.

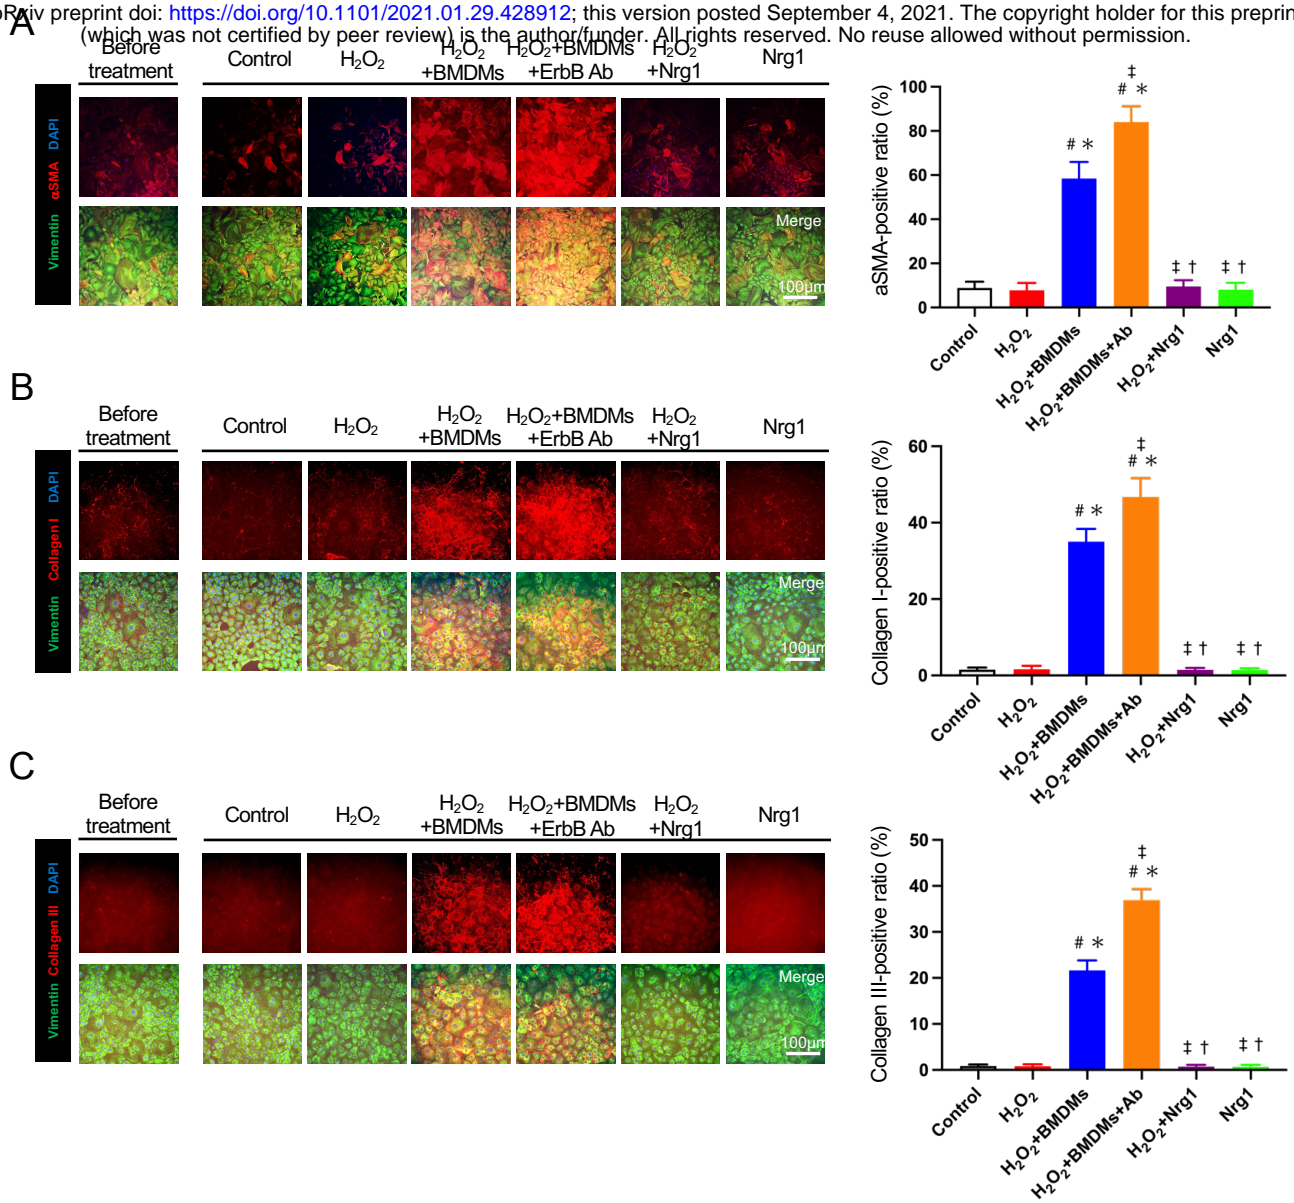

**Figure 5.**

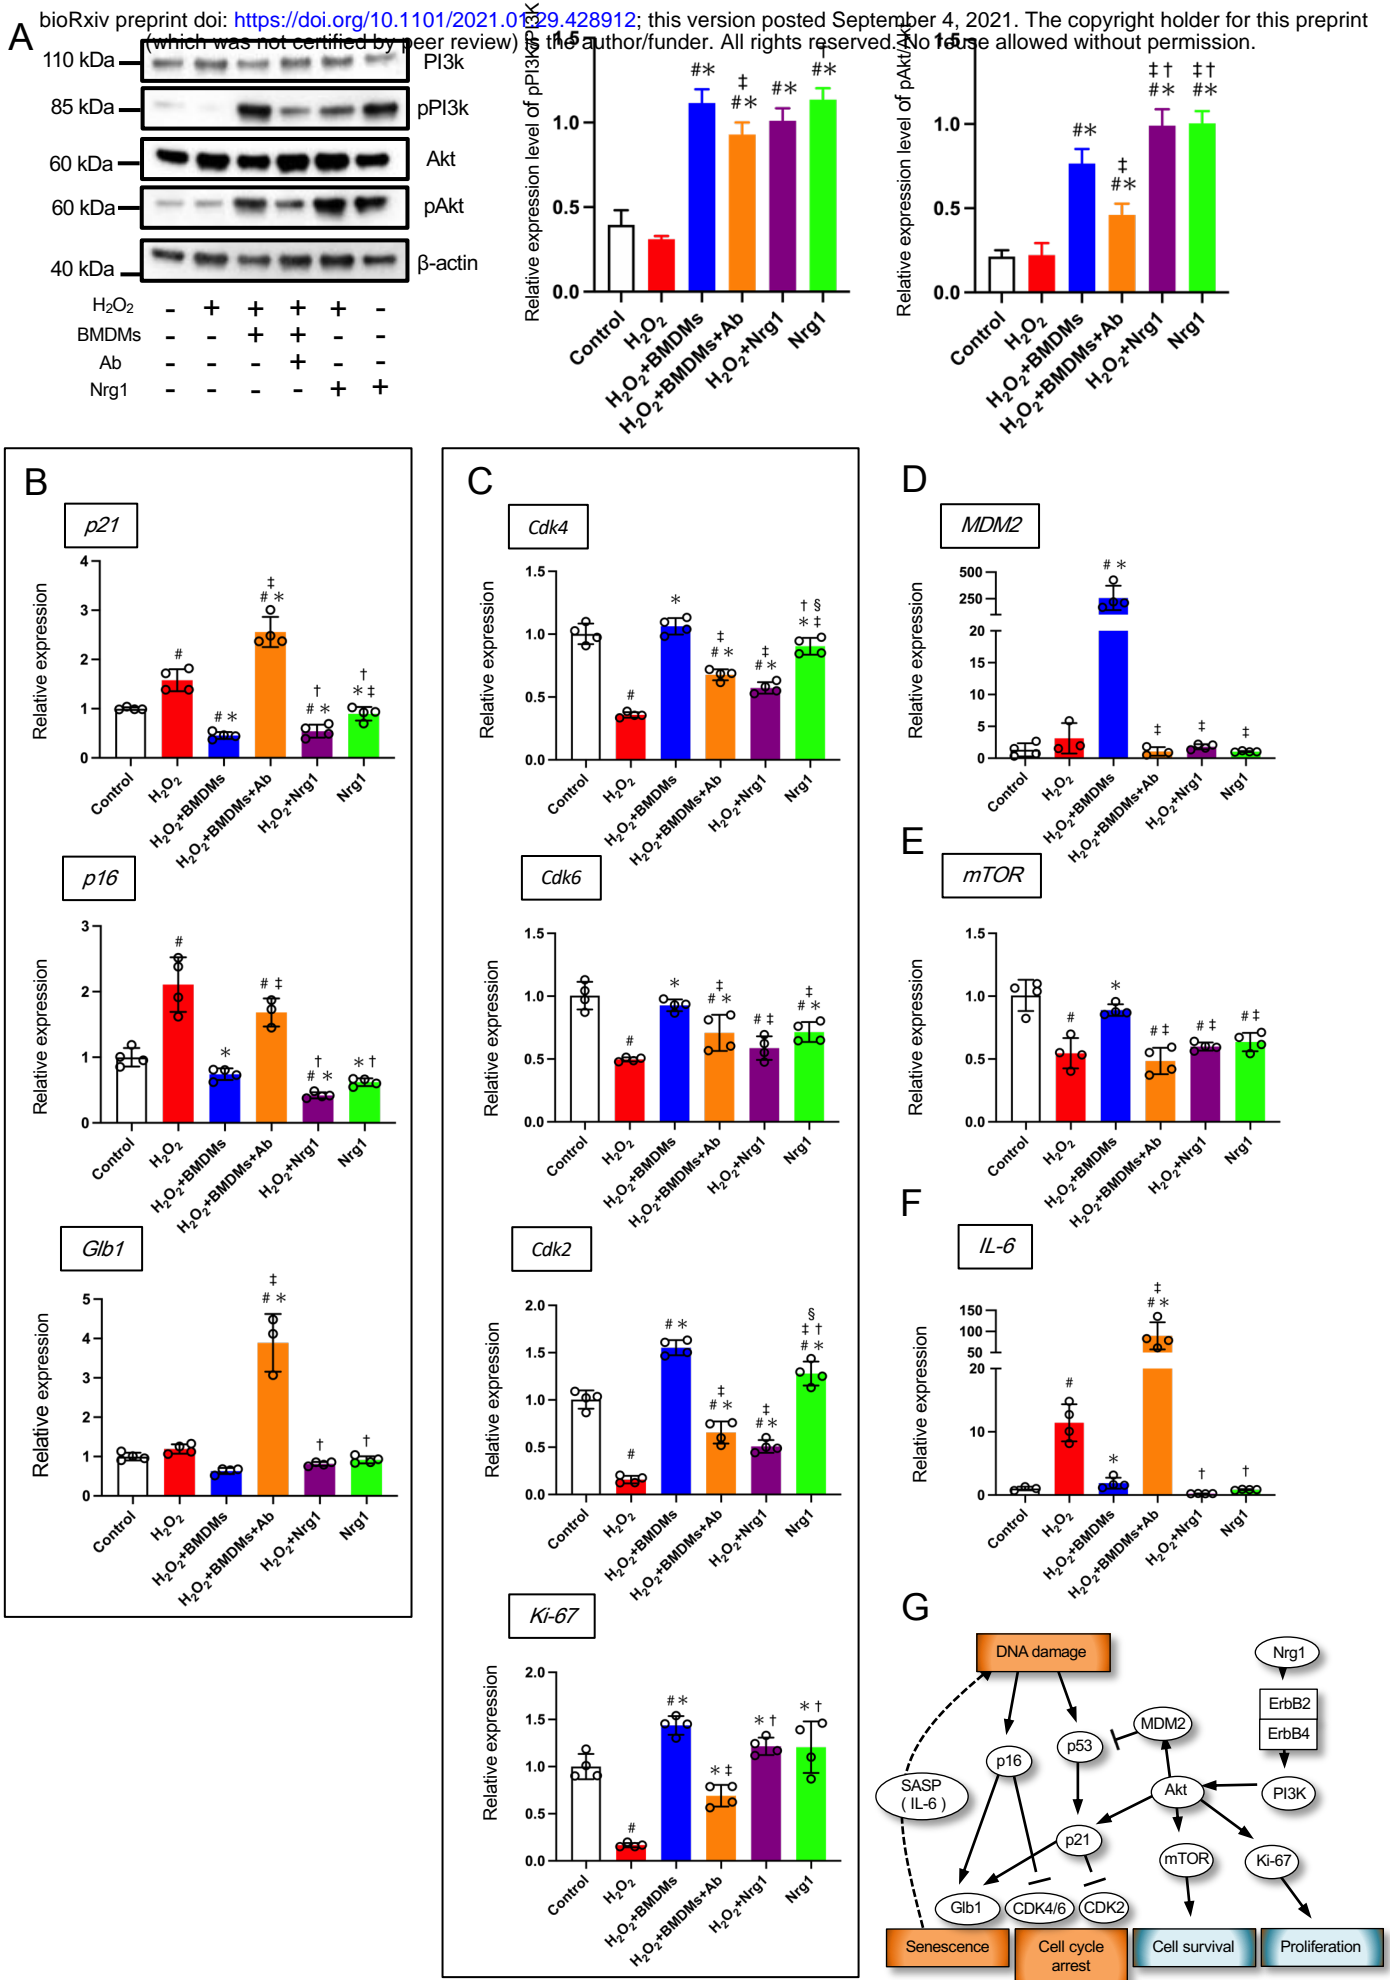

**Figure 6.**

bioRxiv preprint doi: <https://doi.org/10.1101/2021.01.29.428912>; this version posted September 4, 2021. The copyright holder for this preprint (which was not certified by peer review) is the author/funder. All rights reserved. No reuse allowed without permission.

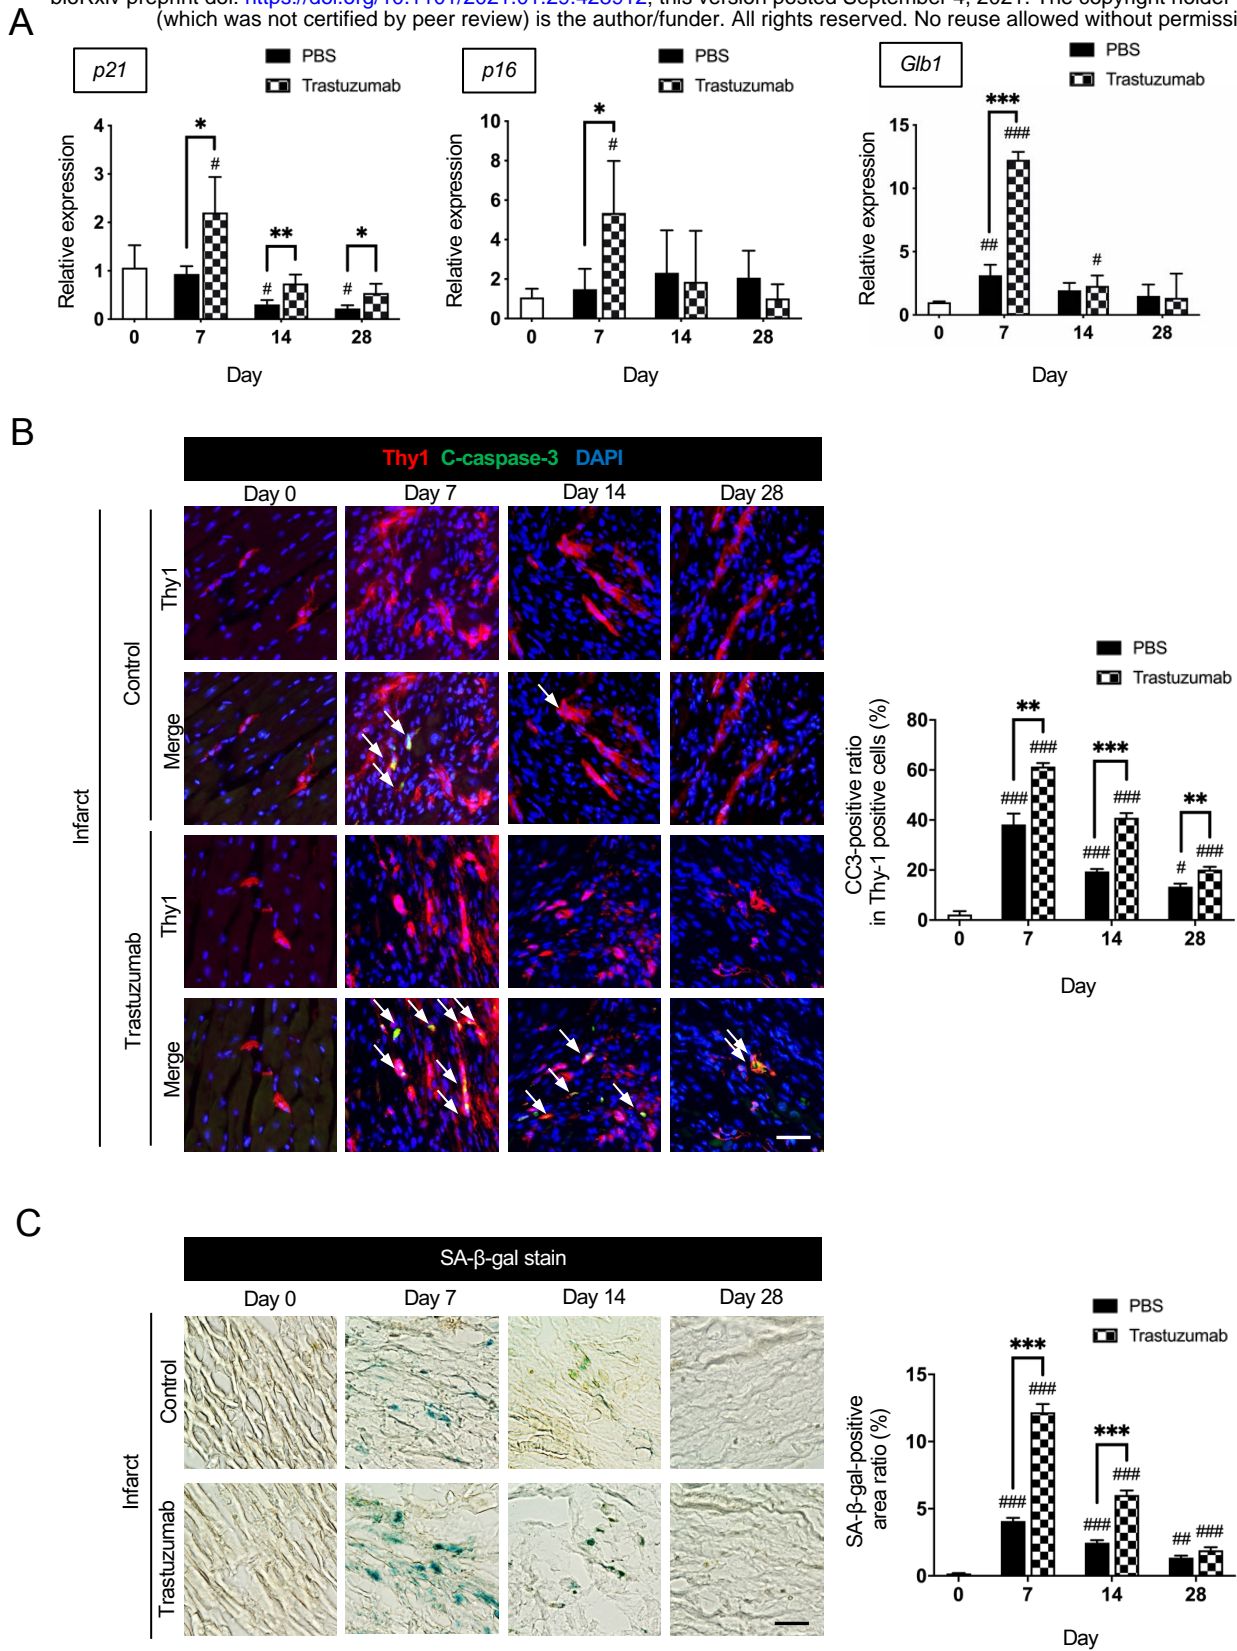

**Figure 7.**

bioRxiv preprint doi: <https://doi.org/10.1101/2021.01.29.428912>; this version posted September 4, 2021. The copyright holder for this preprint (which was not certified by peer review) is the author/funder. All rights reserved. No reuse allowed without permission.

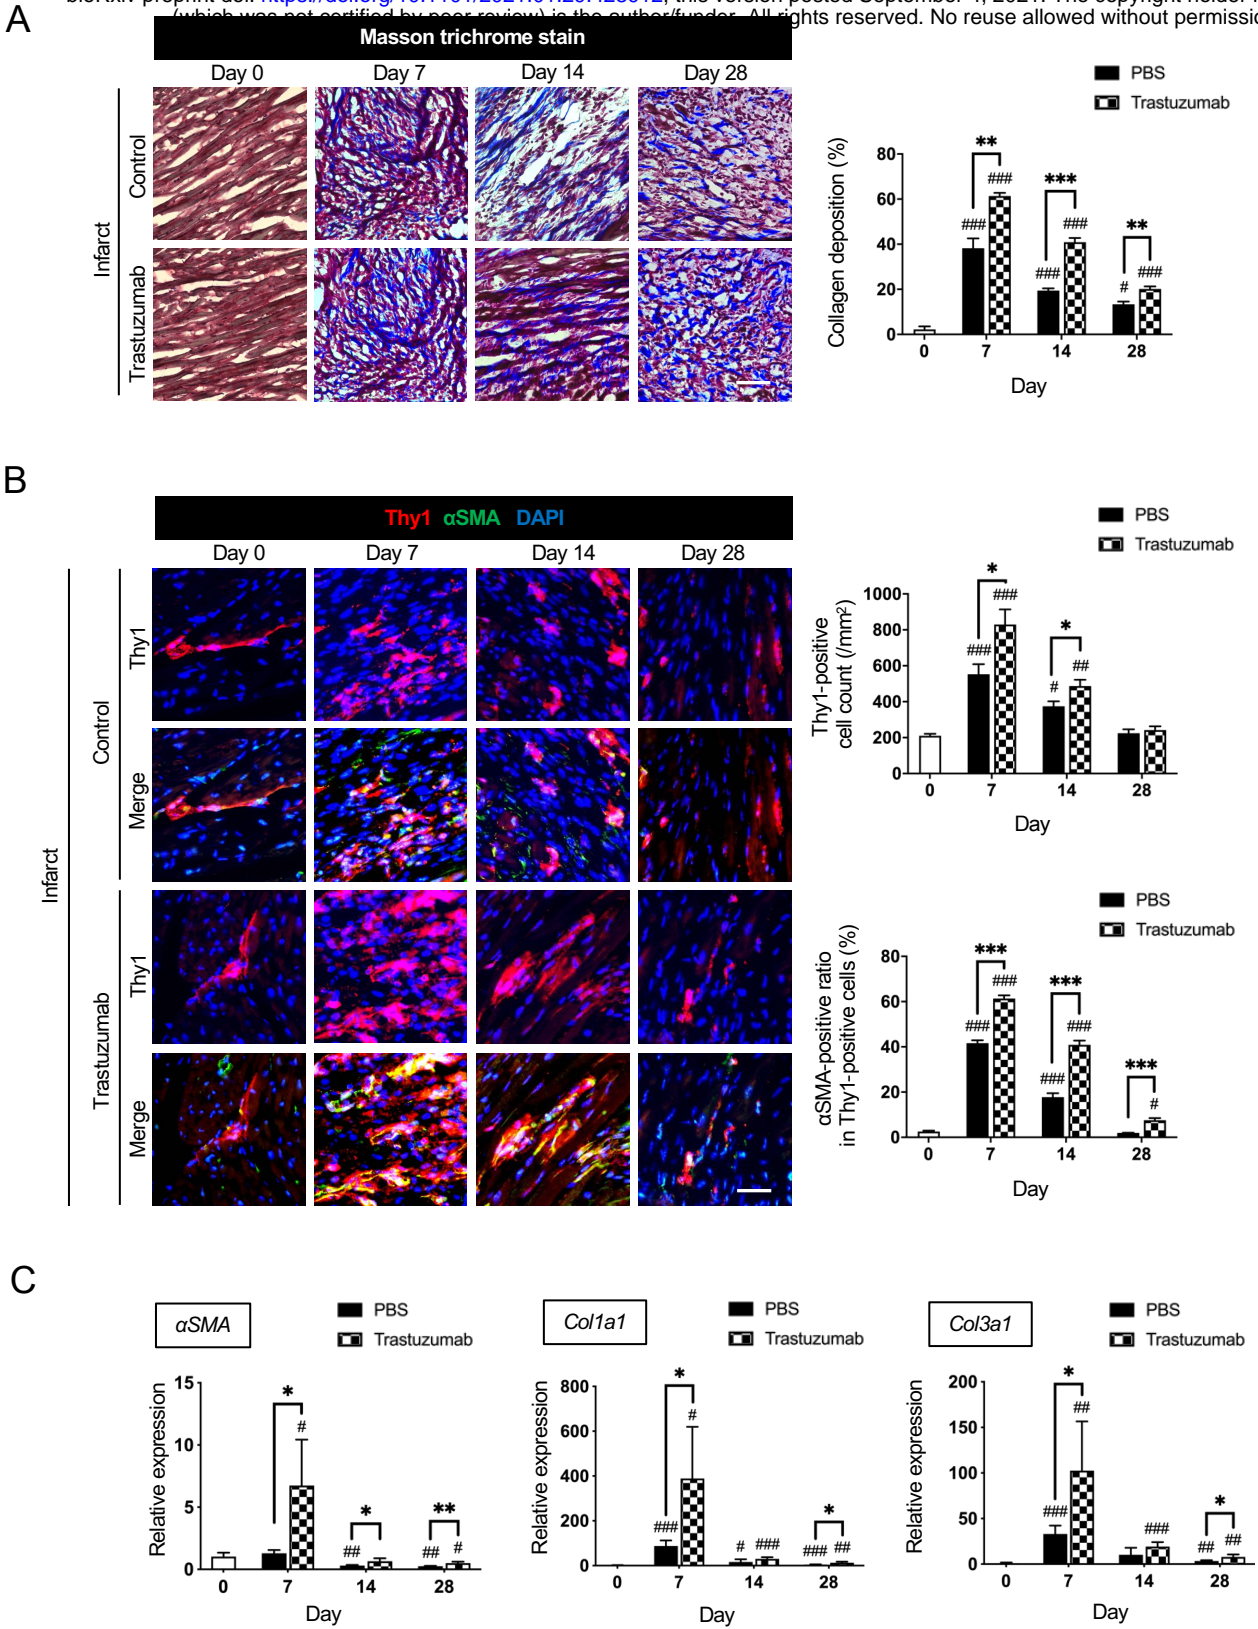

**Figure 8.**

bioRxiv preprint doi: <https://doi.org/10.1101/2021.01.29.428912>; this version posted September 4, 2021. The copyright holder for this preprint (which was not certified by peer review) is the author/funder. All rights reserved. No reuse allowed without permission.

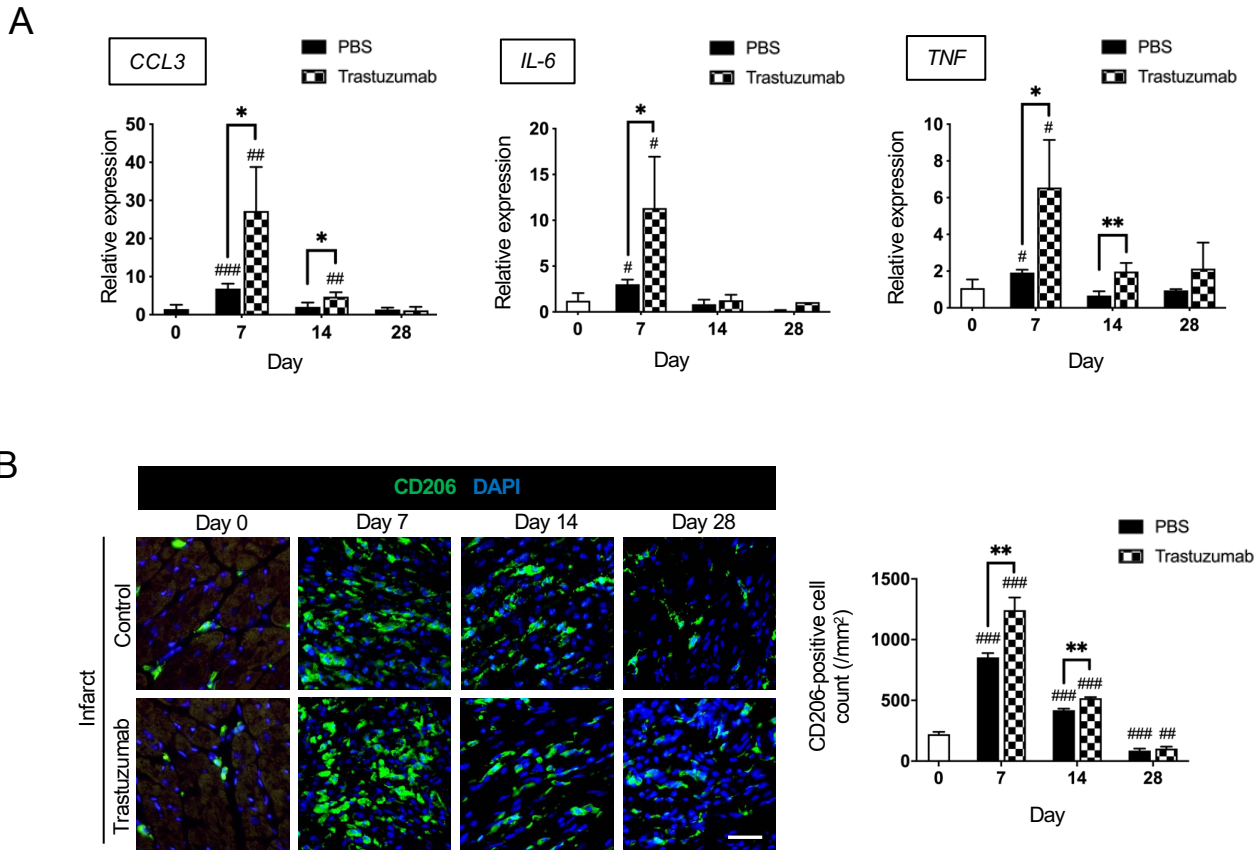

Source: https://www.biorxiv.org/content/biorxiv/early/2021/09/04/2021.01.29.428912.full.pdf
